# Supplementary material for: ANGPTL4-ETV5-CDH5 Signaling Axis: A Novel Pathway Driving Metastasis in Ovarian Cancer
Source: Research Square preprint supplement (doi:10.21203/rs.3.rs-8747059/v1), 2026-02-17
Supplement: Supplementary file 1 [file 10cb01ce19fa13fd88ba4837.xlsx]

## Sheet: Sheet1
significantly up- and down-regulated genes between matched metastatic foci and the primary foci of ovarian cancer patients
gene	locus	sample_1	sample_2	status	value_1	value_2	log2(fold_change)	test_stat	p_value	q_value	significant	C1	C2	C3	C4	S1	S2	S3	S4
ACKR3	chr2:237478379-237490994	C	S	OK	5.69951	21.4938	1.91501	1.72755	5e-05	0.0134871	yes	7.07952	6.00283	4.48983	5.22587	27.7051	11.8053	4.71489	41.7499
ADAM12	chr10:127700953-128077127	C	S	OK	2.63446	16.4457	2.64213	2.43146	5e-05	0.0134871	yes	2.89084	2.8051	1.68967	3.15223	24.6922	28.7866	1.30821	10.9958
ADAMTS2	chr5:178537851-178772431	C	S	OK	7.76362	32.6633	2.07287	1.89255	5e-05	0.0134871	yes	4.7441	3.86362	16.3151	6.13168	45.981	48.4944	13.3522	22.8256
ANGPTL4	chr19:8429010-8439259	C	S	OK	11.4061	75.5989	2.72856	2.05173	5e-05	0.0134871	yes	10.2899	0.266586	28.7632	6.30459	195.14	2.47354	51.3688	53.4129
AOC3	chr17:41003200-41010147	C	S	OK	7.21631	71.1241	3.301	2.46873	5e-05	0.0134871	yes	2.06018	9.95365	15.3164	1.53499	48.9712	19.0841	15.4007	201.04
BGN	chrX:152713122-152775004	C	S	OK	66.4913	745.133	3.48626	2.4497	5e-05	0.0134871	yes	92.5842	46.4411	104.809	22.1306	1046.12	1313	81.2436	540.158
C1QTNF5	chr11:119209643-119217383	C	S	OK	13.283	91.3388	2.78165	2.31733	5e-05	0.0134871	yes	29.9199	4.31583	15.2348	3.66144	123.188	145.066	15.6717	81.4302
C1QTNF6	chr22:37576205-37584330	C	S	OK	9.42296	37.3922	1.98849	1.92265	5e-05	0.0134871	yes	8.68396	7.41905	16.7309	4.85791	34.84	71.9506	13.8025	28.9759
CALML5	chr10:5540657-5541533	C	S	OK	54.2218	1.8801	-4.84999	-3.25275	5e-05	0.0134871	yes	215.408	0	1.47952	0	2.42566	2.20661	2.88813	0
CD300LB	chr17:72517312-72527613	C	S	OK	0.401247	5.20144	3.69635	1.82374	0.00015	0.03129	yes	0.0888925	0.138976	0.501637	0.875483	18.5082	1.00037	0.441966	0.855249
CDH5	chr16:66400524-66438689	C	S	OK	6.4261	21.6978	1.75553	1.776	0.00025	0.0454797	yes	3.71957	4.78502	12.1152	5.08461	22.9602	11.6654	11.5215	40.6442
CEBPA	chr19:33790839-33793470	C	S	OK	6.51086	69.314	3.41223	2.5031	5e-05	0.0134871	yes	1.36178	2.63073	11.0961	10.9548	35.7501	31.8075	12.1096	197.589
CFD	chr19:859664-863610	C	S	OK	27.8164	227.907	3.03444	2.14176	5e-05	0.0134871	yes	3.41977	16.112	66.3767	25.3571	118.491	62.681	80.8132	649.643
CHGB	chr20:5891973-5906005	C	S	OK	9.32463	0.213388	-5.4495	-3.04035	5e-05	0.0134871	yes	0.0546572	37.0007	0.221268	0.0219223	0.191402	0.375205	0.0823494	0.204595
CILP	chr15:65488336-65503840	C	S	OK	5.44443	49.0552	3.17155	2.88354	5e-05	0.0134871	yes	1.19906	6.13291	11.792	2.65378	85.1799	35.9956	12.8456	62.1996
CILP2	chr19:19649073-19657468	C	S	OK	3.60977	36.0993	3.32199	2.69846	5e-05	0.0134871	yes	8.07503	2.83055	2.18931	1.34418	34.8656	89.7193	1.73559	18.0766
COL11A1	chr1:103342022-103574052	C	S	OK	3.08103	59.7966	4.27858	3.03986	5e-05	0.0134871	yes	6.37527	0.238436	0.588319	5.1221	93.7881	123.809	0.437599	21.1518
COL5A1	chr9:137533650-137764464	C	S	OK	39.235	253.464	2.69157	1.71576	0.0002	0.0391125	yes	34.8643	33.3393	65.2329	23.5034	423.496	411.404	65.3793	113.579
COL8A2	chr1:36560836-36590685	C	S	OK	6.21919	24.5672	1.98194	1.97205	5e-05	0.0134871	yes	2.90546	3.29374	9.00713	9.67043	25.4639	48.923	6.80843	17.0737
COLEC12	chr18:319354-500729	C	S	OK	7.90384	28.8307	1.86698	1.90957	0.00025	0.0454797	yes	3.112	11.2211	10.1848	7.09747	29.2855	42.4596	7.91713	35.6606
COMP	chr19:18893582-18902114	C	S	OK	8.74384	180.314	4.3661	2.29581	5e-05	0.0134871	yes	33.7417	0.312744	0.54445	0.376438	518.643	178.012	0.543149	24.0583
COPZ2	chr17:46103532-46115168	C	S	OK	7.34077	40.764	2.47329	2.07206	0.0002	0.0391125	yes	2.7877	9.51402	10.5186	6.54275	40.9379	67.2876	14.1583	40.6721
CPE	chr4:166300096-166419482	C	S	OK	40.709	159.126	1.96675	1.99632	0.0001	0.0240692	yes	18.5019	60.3169	62.9507	21.0667	186.3	166.662	156.896	126.646
CPM	chr12:69244955-69357020	C	S	OK	3.74902	14.9684	1.99733	2.0108	0.00015	0.03129	yes	1.53576	5.6822	6.09033	1.68779	20.9913	21.0914	5.17251	12.6183
CREB3L1	chr11:46299188-46342972	C	S	OK	3.82894	18.3227	2.25862	2.09967	0.0001	0.0240692	yes	3.70885	4.20999	4.3754	3.02151	24.4638	29.7775	4.41724	14.6325
CRISPLD2	chr16:84853586-84943116	C	S	OK	8.35356	60.5524	2.85772	2.24744	5e-05	0.0134871	yes	4.39382	6.33126	20.4101	2.27906	48.1702	124.777	15.6237	53.6385
CTHRC1	chr8:104383742-104395232	C	S	OK	28.9169	150.95	2.38409	2.27647	5e-05	0.0134871	yes	32.6037	5.37983	39.6721	38.0118	189.352	279.588	33.4663	101.396
DGAT2	chr11:75479777-75512581	C	S	OK	6.56416	87.3829	3.73467	2.41416	5e-05	0.0134871	yes	7.59194	2.06489	10.1171	6.48277	27.9191	2.06385	10.7371	308.812
DPT	chr1:168664694-168698442	C	S	OK	3.22574	36.7629	3.51055	2.66572	5e-05	0.0134871	yes	0.377742	6.83614	3.92134	1.76773	47.7583	6.67424	3.62771	88.9915
ECEL1	chr2:233344536-233352569	C	S	OK	26.4945	0.614989	-5.42899	-3.05265	5e-05	0.0134871	yes	0.854635	104.005	0.880207	0.237896	0.556249	0.655145	0.757207	0.491355
ECM1	chr1:150480486-150486265	C	S	OK	10.8596	43.435	1.99989	2.04707	5e-05	0.0134871	yes	9.90664	9.85801	11.1961	12.4777	77.0715	61.071	10.2182	25.3796
EPYC	chr12:91357455-91398803	C	S	OK	0.522419	19.4678	5.21974	3.49412	5e-05	0.0134871	yes	0.81435	0.275307	0.420125	0.579894	32.8071	27.068	0.444486	17.5515
F2R	chr5:76011867-76031595	C	S	OK	9.46038	39.259	2.05305	1.92711	0.00015	0.03129	yes	13.7705	4.17412	15.0495	4.84743	75.2177	43.4886	8.2682	30.0614
FABP5	chr8:82192717-82197012	C	S	OK	31.4551	203.266	2.692	2.49072	5e-05	0.0134871	yes	20.6404	13.5141	50.7517	40.9141	317.378	113.137	60.4012	322.147
FAM150B	chr2:279560-288308	C	S	OK	24.1054	0.614111	-5.29471	-2.85326	0.0001	0.0240692	yes	0.533892	95.1722	0.37307	0.342234	1.09271	0.387936	0.405814	0.569981
FAP	chr2:162970950-163100045	C	S	OK	8.42299	51.2185	2.60426	2.45329	5e-05	0.0134871	yes	6.28256	2.18221	19.2539	5.97325	71.1878	83.7292	16.3279	33.6291
FBLN2	chr3:13590624-13679922	C	S	OK	10.0164	65.3218	2.7052	2.50932	5e-05	0.0134871	yes	4.20804	3.17337	20.4815	12.2026	37.9762	83.875	22.299	117.137
FBP1	chr9:97365420-97402531	C	S	OK	8.9303	41.0859	2.20186	1.95224	0.0001	0.0240692	yes	8.93486	5.16397	9.35618	12.2662	99.4303	39.3605	10.9376	14.6152
FN1	chr2:216225162-216300793	C	S	OK	146.007	1005.52	2.78384	0.435424	5e-05	0.0134871	yes	226.625	96.0832	177.321	83.9985	2079.01	1246.05	212.863	484.174
FNDC1	chr6:159586930-159693140	C	S	OK	3.01062	36.5245	3.60073	2.94174	5e-05	0.0134871	yes	3.68008	5.84428	1.2886	1.22952	52.8947	78.0338	0.927286	14.2422
GATA4	chr8:11534427-11617511	C	S	OK	20.2584	0.21374	-6.56652	-3.42248	5e-05	0.0134871	yes	0.222967	80.6001	0.147031	0.0634703	0.116124	0.210834	0.223109	0.304891
GDF6	chr8:97154557-97173020	C	S	OK	0.175087	2.40391	3.77924	2.08781	0.00015	0.03129	yes	0.0668021	0.198776	0.384368	0.0504018	4.67908	2.41388	0.268428	2.25426
GJB2	chr13:20761603-20767114	C	S	OK	3.40244	25.502	2.90597	2.34024	5e-05	0.0134871	yes	4.27933	0.0666656	3.65336	5.6104	32.6508	52.3982	3.66015	13.299
GREM1	chr15:33010204-33026870	C	S	OK	1.28712	17.1787	3.7384	3.04768	5e-05	0.0134871	yes	2.40296	0.104581	1.20838	1.43257	33.592	22.305	1.11239	11.7054
HTR3A	chr11:113845796-113861034	C	S	OK	33.4628	3.56524	-3.23049	-2.05159	0.00025	0.0454797	yes	12.4964	0.0860655	1.04327	120.225	2.46084	5.63327	1.91579	4.25105
ISM1	chr20:13202417-13281297	C	S	OK	2.60176	16.5985	2.6735	2.11209	5e-05	0.0134871	yes	2.61985	0.144721	4.37529	3.26718	14.3479	36.4408	4.19176	11.4138
ITGA11	chr15:68594041-68724492	C	S	OK	3.65833	21.4301	2.55038	2.39894	5e-05	0.0134871	yes	5.278	4.46714	2.10646	2.78171	28.4513	45.9589	1.1584	10.152
KCNIP2	chr10:103578824-103603677	C	S	OK	2.34657	27.4888	3.55022	2.15383	5e-05	0.0134871	yes	0.959876	2.88917	3.76175	1.77548	5.45377	1.09549	4.28414	99.1217
KIF26B	chr1:245318286-245866428	C	S	OK	1.10548	7.20909	2.70515	2.22801	5e-05	0.0134871	yes	0.836375	0.220663	1.96926	1.39561	7.65352	14.723	1.2642	5.19565
KLHDC8A	chr1:205305192-205326218	C	S	OK	100.675	1.19027	-6.40227	-3.9746	5e-05	0.0134871	yes	3.81511	303.163	0.681912	95.0391	2.25234	0.587834	0.936813	0.984077
LEFTY2	chr1:226124297-226129083	C	S	OK	35.2609	0.33683	-6.70991	-3.49769	5e-05	0.0134871	yes	0.322028	138.547	0.267484	1.90694	0.242836	0.623993	0.0940881	0.386401
LOC643201	chr5:175570087-175626298	C	S	OK	5.75988	0.447664	-3.68555	-2.35258	0.00015	0.03129	yes	1.11776	16.9776	1.44459	3.49958	0.0713725	0.523498	0.949652	0.246131
LOX	chr5:121398889-121414055	C	S	OK	10.3667	52.453	2.33907	1.9816	0.0002	0.0391125	yes	6.44786	6.47259	25.4316	3.11475	121.996	37.9625	26.8791	22.9745
LOXL1	chr15:74209808-74244478	C	S	OK	16.4786	105.221	2.67477	2.49653	5e-05	0.0134871	yes	14.3792	18.5101	20.7693	12.2557	96.4203	212.171	20.9193	91.3745
LOXL2	chr8:23154409-23261722	C	S	OK	8.47673	35.3825	2.06146	1.97363	0.00015	0.03129	yes	12.1227	6.29922	11.9436	3.5414	74.6979	42.3601	11.3754	13.0966
LPL	chr8:19796581-19824770	C	S	OK	5.31094	89.8205	4.08	2.48647	5e-05	0.0134871	yes	0.57559	0.87718	18.024	1.76698	48.1223	19.2521	15.9837	275.924
LRRC15	chr3:194075975-194090472	C	S	OK	0.960614	16.896	4.13658	2.61544	5e-05	0.0134871	yes	1.21243	0.162569	0.0834888	2.38397	16.86	39.9216	0.0636543	10.7386
LSP1	chr11:1874199-1913493	C	S	OK	20.97	89.1846	2.08847	2.14963	5e-05	0.0134871	yes	4.30676	25.2464	30.8936	23.4332	160.262	103.136	28.542	64.7987
MFAP2	chr1:17300998-17308081	C	S	OK	27.2318	133.62	2.29477	2.20791	5e-05	0.0134871	yes	42.3334	41.04	16.8268	8.72697	157.361	288.098	26.6012	62.4181
MGLL	chr3:127407904-127542093	C	S	OK	8.82059	40.8801	2.21245	2.19565	0.0001	0.0240692	yes	6.05682	4.48409	15.4358	9.30568	44.6871	28.7277	14.3855	75.7201
MMP9	chr20:44637546-44645200	C	S	OK	13.3626	267.538	4.32347	2.8644	5e-05	0.0134871	yes	9.76436	13.9421	15.5949	14.1492	565.687	459.702	13.8105	30.952
MOXD1	chr6:132617193-132722673	C	S	OK	1.94605	17.304	3.15248	2.47483	5e-05	0.0134871	yes	1.82008	0.678774	4.19399	1.09136	11.4695	37.2399	2.85627	17.6503
NPC1L1	chr7:44552134-44580914	C	S	OK	1.473	0.115037	-3.67859	-1.76827	5e-05	0.0134871	yes	0.197981	0.105654	0.0865523	5.50183	0.24519	0.039315	0.055212	0.120431
NPNT	chr4:106816596-106892828	C	S	OK	2.34046	21.6245	3.2078	2.27507	5e-05	0.0134871	yes	1.46586	4.06861	3.31264	0.514726	12.4029	58.6168	2.79305	12.6851
NR4A2	chr2:157180943-157189287	C	S	OK	49.7948	2.84016	-4.13195	-2.44301	5e-05	0.0134871	yes	6.50138	183.913	1.05673	7.70774	7.76582	1.56729	1.06107	0.966448
P4HA3	chr11:73977693-74035750	C	S	OK	0.771288	8.70841	3.49707	2.41151	5e-05	0.0134871	yes	0.925464	1.43433	0.529912	0.195444	13.9651	15.4636	1.09161	4.31324
PCOLCE	chr7:100183955-100205798	C	S	OK	63.3096	224.916	1.82889	1.83553	0.00015	0.03129	yes	30.0587	75.1843	104.416	43.5795	229.736	364.25	94.2142	211.461
PIGR	chr1:207101866-207119811	C	S	OK	12.9961	0.304834	-5.41391	-2.91317	5e-05	0.0134871	yes	0.0954096	0.184425	1.15762	50.547	0.0166366	0.598753	0.462908	0.141039
PPP1R1A	chr12:54973023-54982443	C	S	OK	1.74988	20.2886	3.53535	2.22837	0.00015	0.03129	yes	0.691126	2.09966	3.86898	0.339735	7.42044	0.480895	5.15239	68.1008
SAA1	chr11:18287807-18291523	C	S	OK	35.2294	411.677	3.54666	2.54807	5e-05	0.0134871	yes	16.9459	0.764544	60.1363	63.0708	375.47	40.6958	80.3981	1150.15
SCGB2A1	chr11:61976139-61981411	C	S	OK	120.084	21.9861	-2.44938	-2.03767	0.00025	0.0454797	yes	215.285	0	8.05757	256.992	34.8146	41.8114	6.74664	4.57164
SCUBE1	chr22:43599228-43739394	C	S	OK	4.3779	0.153452	-4.83438	-2.69823	5e-05	0.0134871	yes	0.360589	17.0247	0.055797	0.0705184	0.182089	0.237416	0.0613325	0.13297
SFRP2	chr4:154701741-154710228	C	S	OK	6.9705	508.781	6.18964	3.9842	5e-05	0.0134871	yes	3.82738	0.805908	13.0435	10.2052	254.56	1016.37	13.391	750.799
SIGLEC11	chr19:50452249-50464429	C	S	OK	22.2147	1.24843	-4.15333	-2.72934	5e-05	0.0134871	yes	0.190829	87.082	1.47056	0.115551	1.59788	0.809258	1.16599	1.4206
SLC19A3	chr2:228549925-228582745	C	S	OK	3.56785	16.2326	2.18576	1.68122	0.0001	0.0240692	yes	2.28095	0.725228	5.41438	5.85084	4.19602	1.96485	5.73011	53.0393
SLC37A2	chr11:124933012-124960412	C	S	OK	4.53063	19.6911	2.11976	2.0754	0.00015	0.03129	yes	1.35599	2.06131	5.8291	8.87613	24.8427	33.7818	5.3924	14.7477
SORBS1	chr10:97071529-97321177	C	S	OK	5.30206	47.3126	3.1576	1.94104	0.0002	0.0391125	yes	5.43912	2.88605	9.29423	3.58886	16.7442	3.8222	8.2298	160.454
STAR	chr8:38000217-38008600	C	S	OK	51.7265	0.240486	-7.74881	-4.01396	5e-05	0.0134871	yes	1.62087	204.901	0.167422	0.216936	0.226431	0.255537	0.300105	0.17987
TENM3	chr4:183245136-183724177	C	S	OK	0.803076	4.30671	2.42298	2.06665	0.00025	0.0454797	yes	0.215148	1.32171	1.31607	0.359378	3.53189	7.14715	1.085	5.46279
TGFB3	chr14:76424439-76448365	C	S	OK	5.37263	20.2823	1.91652	1.81137	0.0002	0.0391125	yes	1.95967	3.42395	13.3456	2.7613	13.4587	27.7267	9.51983	30.4241
TGFBI	chr5:135364583-135399507	C	S	OK	36.3903	208.35	2.51739	2.11241	5e-05	0.0134871	yes	41.4237	31.4493	42.4298	30.2584	359.567	339.256	52.4305	82.1484
THBS4	chr5:79287118-79379488	C	S	OK	1.68186	27.8978	4.05202	2.96864	5e-05	0.0134871	yes	0.265916	3.32483	2.40969	0.727017	14.9167	13.0381	2.43977	81.1965
TMEM119	chr12:108983621-108991894	C	S	OK	2.9765	30.3168	3.34843	2.71788	5e-05	0.0134871	yes	2.36082	0.376679	7.31691	1.85161	40.1973	48.6363	4.24816	28.1854
TNC	chr9:117781853-117880536	C	S	OK	3.96982	15.5043	1.96552	1.85053	0.00015	0.03129	yes	7.33369	1.92769	2.85137	3.76654	33.5758	15.6995	2.81591	9.92597
WIPF3	chr7:29846169-29956682	C	S	OK	10.4224	0.688494	-3.92009	-2.06069	0.00025	0.0454797	yes	0.78798	38.602	0.74967	1.54983	0.432659	1.07962	0.559238	0.682461
ZDHHC8P1	chr22:23732791-23744799	C	S	OK	19.3366	1.26778	-3.93096	-2.49826	0.0001	0.0240692	yes	0.545534	60.1816	1.6898	14.9296	0.848477	0.873539	2.33137	1.01775
