# Supplementary material for: ANGPTL4-ETV5-CDH5 Signaling Axis: A Novel Pathway Driving Metastasis in Ovarian Cancer
Source: Research Square preprint supplement (doi:10.21203/rs.3.rs-8747059/v1), 2026-02-17
Supplement: Supplementary file 2 [file 8a5c8cb6499fbb70fced1eef.xlsx]

## Sheet: All
gene id	gene name	description	gene_type	GO_id	GO_term	KO_ID	KO_Description	kegg_id	kegg_term	locus	updown
ENSG00000271503	CCL5	C-C motif chemokine ligand 5 [Source:HGNC Symbol;Acc:HGNC:10632]	protein_coding	GO:0040011|GO:0005576|GO:0023052|GO:0042056|GO:0008152|GO:0005623|GO:0098772|GO:0002376|GO:0003824|GO:0009987|GO:0051179|GO:0050896|GO:0030234|GO:0071704|GO:0044237|GO:0040017|GO:0051707|GO:0002684|GO:0007165|GO:0006955|GO:0048870|GO:0033036|GO:0023057|GO:0035821|GO:0050900|GO:0002682|GO:0008283|GO:0016043|GO:0007155|GO:0040012|GO:0016740|GO:0019222|GO:0005515|GO:0007154|GO:0009893|GO:0006950|GO:…	locomotion|extracellular region|signaling|chemoattractant activity|metabolic process|cell|molecular function regulator|immune system process|catalytic activity|cellular process|localization|response to stimulus|enzyme regulator activity|organic substance metabolic process|cellular metabolic process|positive regulation of locomotion|response to other organism|positive regulation of immune system p…	K12499	C-C motif chemokine 5[-]	hsa04060|hsa05168|hsa04062|hsa05164|hsa04621|hsa04668|hsa04620|hsa05142|hsa05323|hsa05120|hsa04623|hsa05020	Cytokine-cytokine receptor interaction - Homo sapiens (human)|Herpes simplex infection - Homo sapiens (human)|Chemokine signaling pathway - Homo sapiens (human)|Influenza A - Homo sapiens (human)|NOD-like receptor signaling pathway - Homo sapiens (human)|TNF signaling pathway - Homo sapiens (human)|Toll-like receptor signaling pathway - Homo sapiens (human)|Chagas disease (American trypanosomiasi…	17:35871491-35880793	DOWN
ENSG00000266820	KPNA2P3	karyopherin subunit alpha 2 pseudogene 3 [Source:HGNC Symbol;Acc:HGNC:52870]	transcribed_unprocessed_pseudogene	-	-	-	-	-	-	17:64749918-64758603	DOWN
ENSG00000128422	KRT17	keratin 17 [Source:HGNC Symbol;Acc:HGNC:6427]	protein_coding	GO:0005576|GO:0040007|GO:0023052|GO:0008152|GO:0005623|GO:0032502|GO:0009987|GO:0004871|GO:0005198|GO:0050896|GO:0071704|GO:0044237|GO:0007165|GO:0043227|GO:0048856|GO:0071944|GO:0050793|GO:0016043|GO:0016049|GO:0019222|GO:0005515|GO:0004872|GO:0007154|GO:0009893|GO:0005622|GO:0038023|GO:0045927|GO:0009653|GO:0005615|GO:0009058|GO:0043229|GO:0006807|GO:0005200|GO:0051716|GO:0040008|GO:0050794|GO:…	extracellular region|growth|signaling|metabolic process|cell|developmental process|cellular process|signal transducer activity|structural molecule activity|response to stimulus|organic substance metabolic process|cellular metabolic process|signal transduction|membrane-bounded organelle|anatomical structure development|cell periphery|regulation of developmental process|cellular component organizat…	-	-	-	-	17:41619437-41624842	DOWN
ENSG00000130477	UNC13A	unc-13 homolog A [Source:HGNC Symbol;Acc:HGNC:23150]	protein_coding	GO:0045202|GO:0040007|GO:0023052|GO:0008152|GO:0005623|GO:0016020|GO:0032502|GO:0009987|GO:0030054|GO:0051179|GO:0050896|GO:0071704|GO:0044237|GO:0098793|GO:0007165|GO:0048786|GO:0043167|GO:0097060|GO:0048856|GO:0031594|GO:0051641|GO:0071944|GO:0050793|GO:0016043|GO:0016049|GO:0016082|GO:0019222|GO:0007269|GO:0005886|GO:0048589|GO:0042995|GO:0005515|GO:0007154|GO:0005622|GO:0045927|GO:0016079|GO:…	synapse|growth|signaling|metabolic process|cell|membrane|developmental process|cellular process|cell junction|localization|response to stimulus|organic substance metabolic process|cellular metabolic process|presynapse|signal transduction|presynaptic active zone|ion binding|synaptic membrane|anatomical structure development|neuromuscular junction|cellular localization|cell periphery|regulation of …	K15293	protein unc-13 A/B/C[-]	hsa04721	Synaptic vesicle cycle - Homo sapiens (human)	19:17601328-17688365	DOWN
ENSG00000129128	SPCS3	signal peptidase complex subunit 3 [Source:HGNC Symbol;Acc:HGNC:26212]	protein_coding	GO:0008152|GO:0005623|GO:0032991|GO:0016020|GO:0003824|GO:0009987|GO:0051179|GO:0071704|GO:0044237|GO:0031090|GO:0043227|GO:0033036|GO:0043234|GO:0051641|GO:0031224|GO:0005789|GO:1902494|GO:0005622|GO:0042175|GO:0012505|GO:0016787|GO:0043229|GO:0006807|GO:0008233|GO:0045184|GO:0034641|GO:0006810|GO:0046907|GO:0016021|GO:0005783|GO:0005787|GO:0008104|GO:0005737|GO:0043231|GO:0051649|GO:0019538|GO:…	metabolic process|cell|macromolecular complex|membrane|catalytic activity|cellular process|localization|organic substance metabolic process|cellular metabolic process|organelle membrane|membrane-bounded organelle|macromolecule localization|protein complex|cellular localization|intrinsic component of membrane|endoplasmic reticulum membrane|catalytic complex|intracellular|nuclear outer membrane-end…	K12948	signal peptidase complex subunit 3 [EC:3.4.-.-][-]	hsa03060	Protein export - Homo sapiens (human)	4:176319964-176332245	DOWN
ENSG00000145623	OSMR	oncostatin M receptor [Source:HGNC Symbol;Acc:HGNC:8507]	protein_coding	GO:0023052|GO:0005623|GO:0032991|GO:0016020|GO:0009987|GO:0004871|GO:0050896|GO:0007165|GO:0071944|GO:0008283|GO:0031224|GO:0005886|GO:0005515|GO:0004872|GO:0007154|GO:0006950|GO:0038023|GO:0009605|GO:0043235|GO:0051716|GO:0050794|GO:0045177|GO:0019838|GO:0031226|GO:0004888|GO:0008284|GO:0016021|GO:0006952|GO:0010033|GO:0007166|GO:0016324|GO:0042127|GO:0071310|GO:0005887|GO:0006954|GO:0050729|GO:…	signaling|cell|macromolecular complex|membrane|cellular process|signal transducer activity|response to stimulus|signal transduction|cell periphery|cell proliferation|intrinsic component of membrane|plasma membrane|protein binding|receptor activity|cell communication|response to stress|signaling receptor activity|response to external stimulus|receptor complex|cellular response to stimulus|regulati…	K05057	oncostatin M receptor[-]	hsa04151|hsa04060|hsa04630	PI3K-Akt signaling pathway - Homo sapiens (human)|Cytokine-cytokine receptor interaction - Homo sapiens (human)|Jak-STAT signaling pathway - Homo sapiens (human)	5:38845858-38945596	DOWN
ENSG00000270181	BIVM-ERCC5	BIVM-ERCC5 readthrough [Source:HGNC Symbol;Acc:HGNC:43690]	protein_coding	GO:0008152|GO:0005623|GO:0003824|GO:0009987|GO:0050896|GO:0071704|GO:0044237|GO:0043227|GO:0097159|GO:0006950|GO:0005622|GO:0016787|GO:0043229|GO:0006807|GO:0051716|GO:0034641|GO:0006139|GO:0016788|GO:0006725|GO:0033554|GO:0003676|GO:0046483|GO:0043231|GO:0005634|GO:0006974|GO:0004518|GO:0006259|GO:0003677|GO:0004519|GO:0003697|GO:0006281|GO:0004536|GO:0090305|GO:0006289|GO:0033683|GO:0004520|GO:…	metabolic process|cell|catalytic activity|cellular process|response to stimulus|organic substance metabolic process|cellular metabolic process|membrane-bounded organelle|organic cyclic compound binding|response to stress|intracellular|hydrolase activity|intracellular organelle|nitrogen compound metabolic process|cellular response to stimulus|cellular nitrogen compound metabolic process|nucleobase…	K10846	DNA excision repair protein ERCC-5[-]	hsa03420	Nucleotide excision repair - Homo sapiens (human)	13:102799110-102876001	DOWN
ENSG00000162407	PLPP3	phospholipid phosphatase 3 [Source:HGNC Symbol;Acc:HGNC:9229]	protein_coding	GO:0040011|GO:0005576|GO:0023052|GO:0008152|GO:0000003|GO:0005623|GO:0022414|GO:0016020|GO:0003824|GO:0009987|GO:0030054|GO:0051179|GO:0050896|GO:0071704|GO:0044237|GO:0040017|GO:0007165|GO:0048870|GO:0043227|GO:0071944|GO:0009892|GO:0031224|GO:0007155|GO:0040012|GO:0019222|GO:0005886|GO:0051091|GO:0005515|GO:0019953|GO:0007154|GO:0006950|GO:0048609|GO:0030155|GO:0005622|GO:0045785|GO:0012505|GO:…	locomotion|extracellular region|signaling|metabolic process|reproduction|cell|reproductive process|membrane|catalytic activity|cellular process|cell junction|localization|response to stimulus|organic substance metabolic process|cellular metabolic process|positive regulation of locomotion|signal transduction|cell motility|membrane-bounded organelle|cell periphery|negative regulation of metabolic p…	K01080	phosphatidate phosphatase[3.1.3.4]	hsa01100|hsa04072|hsa00564|hsa04666|hsa00561|hsa00600|hsa00565|hsa04975	Metabolic pathways - Homo sapiens (human)|Phospholipase D signaling pathway - Homo sapiens (human)|Glycerophospholipid metabolism - Homo sapiens (human)|Fc gamma R-mediated phagocytosis - Homo sapiens (human)|Glycerolipid metabolism - Homo sapiens (human)|Sphingolipid metabolism - Homo sapiens (human)|Ether lipid metabolism - Homo sapiens (human)|Fat digestion and absorption - Homo sapiens (human)	1:56494747-56645301	DOWN
ENSG00000196639	HRH1	histamine receptor H1 [Source:HGNC Symbol;Acc:HGNC:5182]	protein_coding	GO:0040011|GO:0023052|GO:0008152|GO:0005623|GO:0016020|GO:0002376|GO:0009987|GO:0051179|GO:0007610|GO:0004871|GO:0050896|GO:0071704|GO:0044237|GO:0007165|GO:0048870|GO:0050900|GO:0071944|GO:0009628|GO:0031224|GO:0019222|GO:0005886|GO:0004872|GO:0007154|GO:0009893|GO:0006950|GO:0005622|GO:0038023|GO:0023051|GO:0009605|GO:0009058|GO:0051716|GO:0050794|GO:0043647|GO:0044262|GO:0035556|GO:0007611|GO:…	locomotion|signaling|metabolic process|cell|membrane|immune system process|cellular process|localization|behavior|signal transducer activity|response to stimulus|organic substance metabolic process|cellular metabolic process|signal transduction|cell motility|leukocyte migration|cell periphery|response to abiotic stimulus|intrinsic component of membrane|regulation of metabolic process|plasma membr…	K04149	histamine receptor H1[-]	hsa04080|hsa04020|hsa04750	Neuroactive ligand-receptor interaction - Homo sapiens (human)|Calcium signaling pathway - Homo sapiens (human)|Inflammatory mediator regulation of TRP channels - Homo sapiens (human)	3:11137093-11263557	DOWN
ENSG00000101846	STS	steroid sulfatase [Source:HGNC Symbol;Acc:HGNC:11425]	protein_coding	GO:0008152|GO:0000003|GO:0005623|GO:0022414|GO:0016020|GO:0032502|GO:0003824|GO:0009987|GO:0071704|GO:0044237|GO:0043227|GO:0043167|GO:0048856|GO:0071944|GO:0031224|GO:0005886|GO:0005789|GO:0005622|GO:0042175|GO:0012505|GO:0016787|GO:0043229|GO:0006807|GO:0009056|GO:0031982|GO:0009888|GO:0005768|GO:0007565|GO:0016788|GO:1901135|GO:0016021|GO:0005794|GO:0044255|GO:0005783|GO:0097708|GO:0006629|GO:…	metabolic process|reproduction|cell|reproductive process|membrane|developmental process|catalytic activity|cellular process|organic substance metabolic process|cellular metabolic process|membrane-bounded organelle|ion binding|anatomical structure development|cell periphery|intrinsic component of membrane|plasma membrane|endoplasmic reticulum membrane|intracellular|nuclear outer membrane-endoplasm…	K01131	steryl-sulfatase[3.1.6.2]	hsa00140	Steroid hormone biosynthesis - Homo sapiens (human)	X:7219456-7354810	DOWN
ENSG00000267519	AC020916.1	novel transcript	antisense	-	-	-	-	-	-	19:13834516-13836289	DOWN
ENSG00000251201	TMED7-TICAM2	TMED7-TICAM2 readthrough [Source:HGNC Symbol;Acc:HGNC:33945]	protein_coding	GO:0016020|GO:0031224|GO:0016021	membrane|intrinsic component of membrane|integral component of membrane	-	-	-	-	5:115578642-115626161	DOWN
ENSG00000127954	STEAP4	STEAP4 metalloreductase [Source:HGNC Symbol;Acc:HGNC:21923]	protein_coding	GO:0005576|GO:0008152|GO:0005623|GO:0016020|GO:0032502|GO:0003824|GO:0009987|GO:0051179|GO:0031090|GO:0016491|GO:0043227|GO:0043167|GO:0071944|GO:0031224|GO:0005886|GO:0005622|GO:0012505|GO:0005615|GO:0043229|GO:0031982|GO:0005768|GO:0006810|GO:0031226|GO:0016021|GO:0005794|GO:0042592|GO:0055114|GO:0097708|GO:0010008|GO:0005737|GO:0043231|GO:0070062|GO:0016722|GO:1903561|GO:0043169|GO:0005769|GO:…	extracellular region|metabolic process|cell|membrane|developmental process|catalytic activity|cellular process|localization|organelle membrane|oxidoreductase activity|membrane-bounded organelle|ion binding|cell periphery|intrinsic component of membrane|plasma membrane|intracellular|endomembrane system|extracellular space|intracellular organelle|vesicle|endosome|transport|intrinsic component of pl…	-	-	-	-	7:88270892-88306891	DOWN
ENSG00000173166	RAPH1	Ras association (RalGDS/AF-6) and pleckstrin homology domains 1 [Source:HGNC Symbol;Acc:HGNC:14436]	protein_coding	GO:0040007|GO:0023052|GO:0005623|GO:0016020|GO:0032502|GO:0009987|GO:0050896|GO:0007165|GO:0043227|GO:0048856|GO:0071944|GO:0016043|GO:0016049|GO:0005886|GO:0048589|GO:0042995|GO:0005515|GO:0007154|GO:0005622|GO:0009653|GO:0043229|GO:0051716|GO:0031252|GO:0050794|GO:0060560|GO:0048468|GO:0030030|GO:0030027|GO:0048588|GO:0005737|GO:0043231|GO:0048731|GO:0007275|GO:0000902|GO:0048666|GO:0005634|GO:…	growth|signaling|cell|membrane|developmental process|cellular process|response to stimulus|signal transduction|membrane-bounded organelle|anatomical structure development|cell periphery|cellular component organization|cell growth|plasma membrane|developmental growth|cell projection|protein binding|cell communication|intracellular|anatomical structure morphogenesis|intracellular organelle|cellular…	-	-	-	-	2:203394345-203535410	DOWN
ENSG00000166750	SLFN5	schlafen family member 5 [Source:HGNC Symbol;Acc:HGNC:28286]	protein_coding	GO:0005623|GO:0032502|GO:0009987|GO:0097367|GO:0043227|GO:0043167|GO:0097159|GO:0005622|GO:0043229|GO:0036094|GO:0000166|GO:0043231|GO:0032555|GO:0005634|GO:0035639|GO:0030154|GO:0017076|GO:0030554|GO:0032559|GO:0005524	cell|developmental process|cellular process|carbohydrate derivative binding|membrane-bounded organelle|ion binding|organic cyclic compound binding|intracellular|intracellular organelle|small molecule binding|nucleotide binding|intracellular membrane-bounded organelle|purine ribonucleotide binding|nucleus|purine ribonucleoside triphosphate binding|cell differentiation|purine nucleotide binding|ade…	-	-	-	-	17:35243036-35273655	DOWN
ENSG00000136153	LMO7	LIM domain 7 [Source:HGNC Symbol;Acc:HGNC:6646]	protein_coding	GO:0023052|GO:0008152|GO:0005623|GO:0032991|GO:0016020|GO:0003824|GO:0009987|GO:0030054|GO:0071704|GO:0044237|GO:0030055|GO:0043227|GO:0043167|GO:0071944|GO:0031224|GO:0007155|GO:0016740|GO:0005886|GO:0005515|GO:1902494|GO:0030155|GO:0005622|GO:0023051|GO:0043229|GO:0006807|GO:0005911|GO:0045177|GO:0016021|GO:0008022|GO:0005912|GO:0098609|GO:1990234|GO:0005924|GO:0005737|GO:0019787|GO:0016324|GO:…	signaling|metabolic process|cell|macromolecular complex|membrane|catalytic activity|cellular process|cell junction|organic substance metabolic process|cellular metabolic process|cell-substrate junction|membrane-bounded organelle|ion binding|cell periphery|intrinsic component of membrane|cell adhesion|transferase activity|plasma membrane|protein binding|catalytic complex|regulation of cell adhesio…	K06084	F-box protein 20[-]	hsa04520	Adherens junction - Homo sapiens (human)	13:75620434-75859870	DOWN
ENSG00000057149	SERPINB3	serpin family B member 3 [Source:HGNC Symbol;Acc:HGNC:10569]	protein_coding	GO:0040011|GO:0005576|GO:0023052|GO:0008152|GO:0005623|GO:0098772|GO:0002376|GO:0032502|GO:0009987|GO:0051179|GO:0050896|GO:0030234|GO:0071704|GO:0044237|GO:0040017|GO:0007165|GO:0006955|GO:0048870|GO:0043227|GO:0048856|GO:0023057|GO:0050793|GO:0008283|GO:0009892|GO:0040012|GO:0019222|GO:0005515|GO:0004872|GO:0007154|GO:0009893|GO:0006950|GO:0005622|GO:0012505|GO:0065009|GO:0045321|GO:0023051|GO:…	locomotion|extracellular region|signaling|metabolic process|cell|molecular function regulator|immune system process|developmental process|cellular process|localization|response to stimulus|enzyme regulator activity|organic substance metabolic process|cellular metabolic process|positive regulation of locomotion|signal transduction|immune response|cell motility|membrane-bounded organelle|anatomical…	K13963	serpin B[-]	hsa05146	Amoebiasis - Homo sapiens (human)	18:63655197-63661963	DOWN
ENSG00000214736	TOMM6	translocase of outer mitochondrial membrane 6 [Source:HGNC Symbol;Acc:HGNC:34528]	protein_coding	GO:0008152|GO:0005623|GO:0032991|GO:0016020|GO:0009987|GO:0051179|GO:0019867|GO:0044237|GO:0031090|GO:0043227|GO:0033036|GO:0043234|GO:0005622|GO:0043229|GO:0009056|GO:0045184|GO:0006810|GO:0098799|GO:0008104|GO:0031966|GO:0005737|GO:0043231|GO:0006914|GO:0005741|GO:0015031|GO:0071702|GO:0005742|GO:0005739|GO:0005740|GO:0015833|GO:0042886|GO:0016236	metabolic process|cell|macromolecular complex|membrane|cellular process|localization|outer membrane|cellular metabolic process|organelle membrane|membrane-bounded organelle|macromolecule localization|protein complex|intracellular|intracellular organelle|catabolic process|establishment of protein localization|transport|outer mitochondrial membrane protein complex|protein localization|mitochondrial…	-	-	-	-	6:41787662-41789898	DOWN
ENSG00000254087	LYN	LYN proto-oncogene, Src family tyrosine kinase [Source:HGNC Symbol;Acc:HGNC:6735]	protein_coding	GO:0040011|GO:0005576|GO:0045202|GO:0023052|GO:0008152|GO:0005623|GO:0032991|GO:0016020|GO:0002376|GO:0032502|GO:0003824|GO:0009987|GO:0030054|GO:0051179|GO:0004871|GO:0050896|GO:0097367|GO:0071704|GO:0044237|GO:0002683|GO:0031090|GO:0040017|GO:0051707|GO:0002684|GO:0007165|GO:0006955|GO:0048870|GO:0043227|GO:0043167|GO:0048856|GO:0033036|GO:0043234|GO:0023057|GO:0005057|GO:0050900|GO:0002507|GO:…	locomotion|extracellular region|synapse|signaling|metabolic process|cell|macromolecular complex|membrane|immune system process|developmental process|catalytic activity|cellular process|cell junction|localization|signal transducer activity|response to stimulus|carbohydrate derivative binding|organic substance metabolic process|cellular metabolic process|negative regulation of immune system process…	K05854	tyrosine-protein kinase Lyn[2.7.10.2]	hsa05203|hsa05169|hsa05167|hsa04062|hsa04611|hsa04064|hsa04666|hsa04662|hsa05120|hsa04664|hsa04730	Viral carcinogenesis - Homo sapiens (human)|Epstein-Barr virus infection - Homo sapiens (human)|Kaposi's sarcoma-associated herpesvirus infection - Homo sapiens (human)|Chemokine signaling pathway - Homo sapiens (human)|Platelet activation - Homo sapiens (human)|NF-kappa B signaling pathway - Homo sapiens (human)|Fc gamma R-mediated phagocytosis - Homo sapiens (human)|B cell receptor signaling pa…	8:55879813-56014168	DOWN
ENSG00000198947	DMD	dystrophin [Source:HGNC Symbol;Acc:HGNC:2928]	protein_coding	GO:0045202|GO:0040007|GO:0023052|GO:0008152|GO:0005623|GO:0032991|GO:0016020|GO:0032502|GO:0009987|GO:0030054|GO:0051179|GO:0005198|GO:0050896|GO:0008021|GO:0019867|GO:0097367|GO:0071704|GO:0044237|GO:0031090|GO:0030055|GO:0098793|GO:0007165|GO:1990904|GO:0043227|GO:0043167|GO:0097060|GO:0048856|GO:0033036|GO:0043234|GO:0023057|GO:0030672|GO:0051641|GO:0071944|GO:0050793|GO:0009628|GO:0008283|GO:…	synapse|growth|signaling|metabolic process|cell|macromolecular complex|membrane|developmental process|cellular process|cell junction|localization|structural molecule activity|response to stimulus|synaptic vesicle|outer membrane|carbohydrate derivative binding|organic substance metabolic process|cellular metabolic process|organelle membrane|cell-substrate junction|presynapse|signal transduction|ri…	K10366	dystrophin[-]	hsa05414|hsa05410|hsa05412|hsa05416	Dilated cardiomyopathy (DCM) - Homo sapiens (human)|Hypertrophic cardiomyopathy (HCM) - Homo sapiens (human)|Arrhythmogenic right ventricular cardiomyopathy (ARVC) - Homo sapiens (human)|Viral myocarditis - Homo sapiens (human)	X:31097677-33339441	DOWN
ENSG00000154127	UBASH3B	ubiquitin associated and SH3 domain containing B [Source:HGNC Symbol;Acc:HGNC:29884]	protein_coding	GO:0023052|GO:0008152|GO:0005623|GO:0002376|GO:0032502|GO:0003824|GO:0009987|GO:0051179|GO:0050896|GO:0071704|GO:0044237|GO:0002683|GO:0007165|GO:0043227|GO:0048856|GO:0023057|GO:0051641|GO:0050793|GO:0002682|GO:0002520|GO:0009892|GO:0007155|GO:0019222|GO:0005515|GO:0007154|GO:0006950|GO:0030155|GO:0005622|GO:0065009|GO:0016787|GO:0023051|GO:0009605|GO:0043229|GO:0006807|GO:0051716|GO:0048523|GO:…	signaling|metabolic process|cell|immune system process|developmental process|catalytic activity|cellular process|localization|response to stimulus|organic substance metabolic process|cellular metabolic process|negative regulation of immune system process|signal transduction|membrane-bounded organelle|anatomical structure development|negative regulation of signaling|cellular localization|regulatio…	-	-	-	-	11:122655675-122814473	DOWN
ENSG00000198406	BZW1P2	basic leucine zipper and W2 domains 1 pseudogene 2 [Source:HGNC Symbol;Acc:HGNC:33954]	processed_pseudogene	-	-	-	-	-	-	3:116645902-116646727	DOWN
ENSG00000164684	ZNF704	zinc finger protein 704 [Source:HGNC Symbol;Acc:HGNC:32291]	protein_coding	GO:0008152|GO:0005623|GO:0009987|GO:0071704|GO:0044237|GO:0043227|GO:0043167|GO:0097159|GO:0019222|GO:0005622|GO:0009058|GO:0043229|GO:0006807|GO:0050794|GO:0034641|GO:0006139|GO:0031323|GO:0044249|GO:0006725|GO:0003676|GO:0046483|GO:0043231|GO:0051171|GO:0043169|GO:0005634|GO:0051252|GO:0046872|GO:0016070|GO:0034645|GO:0010467|GO:0010468|GO:0003677|GO:0006355|GO:2001141|GO:0003690|GO:0043565|GO:…	metabolic process|cell|cellular process|organic substance metabolic process|cellular metabolic process|membrane-bounded organelle|ion binding|organic cyclic compound binding|regulation of metabolic process|intracellular|biosynthetic process|intracellular organelle|nitrogen compound metabolic process|regulation of cellular process|cellular nitrogen compound metabolic process|nucleobase-containing …	-	-	-	-	8:80628451-80874781	DOWN
ENSG00000164951	PDP1	pyruvate dehyrogenase phosphatase catalytic subunit 1 [Source:HGNC Symbol;Acc:HGNC:9279]	protein_coding	GO:0008152|GO:0005623|GO:0003824|GO:0009987|GO:0071704|GO:0044237|GO:0043227|GO:0043167|GO:0019222|GO:0005515|GO:0005622|GO:0016787|GO:0009058|GO:0043229|GO:0006807|GO:0050794|GO:0042180|GO:0031323|GO:0016788|GO:0044281|GO:0044249|GO:0044255|GO:0006790|GO:0006082|GO:0051186|GO:0006629|GO:0005737|GO:0043231|GO:0019538|GO:0043169|GO:0042578|GO:0044267|GO:0051174|GO:0010565|GO:0046872|GO:0005739|GO:…	metabolic process|cell|catalytic activity|cellular process|organic substance metabolic process|cellular metabolic process|membrane-bounded organelle|ion binding|regulation of metabolic process|protein binding|intracellular|hydrolase activity|biosynthetic process|intracellular organelle|nitrogen compound metabolic process|regulation of cellular process|cellular ketone metabolic process|regulation …	-	-	-	-	8:93857807-93926066	DOWN
ENSG00000114302	PRKAR2A	protein kinase cAMP-dependent type II regulatory subunit alpha [Source:HGNC Symbol;Acc:HGNC:9391]	protein_coding	GO:0005576|GO:0023052|GO:0008152|GO:0000003|GO:0005623|GO:0022414|GO:0032991|GO:0098772|GO:0016020|GO:0003824|GO:0009987|GO:0030054|GO:0050896|GO:0097367|GO:0030234|GO:0071704|GO:0044237|GO:0030055|GO:0007165|GO:0043227|GO:0043167|GO:0043234|GO:0071944|GO:0097159|GO:0009892|GO:0016740|GO:0019222|GO:0005886|GO:0042995|GO:0005515|GO:0019953|GO:1902494|GO:0005952|GO:0007154|GO:0009893|GO:0006950|GO:…	extracellular region|signaling|metabolic process|reproduction|cell|reproductive process|macromolecular complex|molecular function regulator|membrane|catalytic activity|cellular process|cell junction|response to stimulus|carbohydrate derivative binding|enzyme regulator activity|organic substance metabolic process|cellular metabolic process|cell-substrate junction|signal transduction|membrane-bound…	K04739	cAMP-dependent protein kinase regulator[-]	hsa04910	Insulin signaling pathway - Homo sapiens (human)	3:48744597-48847846	DOWN
ENSG00000135114	OASL	2'-5'-oligoadenylate synthetase like [Source:HGNC Symbol;Acc:HGNC:8090]	protein_coding	GO:0023052|GO:0005623|GO:0016020|GO:0002376|GO:0003824|GO:0009987|GO:0050896|GO:0097367|GO:0051707|GO:0007165|GO:0006955|GO:0043227|GO:0043167|GO:0097159|GO:0016740|GO:0005515|GO:0007154|GO:0006950|GO:0005622|GO:0009605|GO:0009607|GO:0043229|GO:0051716|GO:0036094|GO:0050794|GO:0048525|GO:0005102|GO:0043207|GO:0006952|GO:0008134|GO:0045087|GO:0051607|GO:0003676|GO:0009615|GO:0010033|GO:0007166|GO:…	signaling|cell|membrane|immune system process|catalytic activity|cellular process|response to stimulus|carbohydrate derivative binding|response to other organism|signal transduction|immune response|membrane-bounded organelle|ion binding|organic cyclic compound binding|transferase activity|protein binding|cell communication|response to stress|intracellular|response to external stimulus|response to…	K14608	2'-5'-oligoadenylate synthase-like protein[-]	hsa05165	Human papillomavirus infection - Homo sapiens (human)	12:121019111-121039242	DOWN
ENSG00000244731	C4A	complement C4A (Rodgers blood group) [Source:HGNC Symbol;Acc:HGNC:1323]	protein_coding	GO:0005576|GO:0045202|GO:0008152|GO:0005623|GO:0098772|GO:0016020|GO:0002376|GO:0003824|GO:0009987|GO:0030054|GO:0051179|GO:0050896|GO:0030234|GO:0071704|GO:0044237|GO:0002684|GO:0006955|GO:0043227|GO:0071944|GO:0002682|GO:0044297|GO:0016043|GO:0009892|GO:0019222|GO:0005886|GO:0042995|GO:0005515|GO:0006950|GO:0005622|GO:0012505|GO:0065009|GO:0016787|GO:0072562|GO:0002253|GO:0009605|GO:0005615|GO:…	extracellular region|synapse|metabolic process|cell|molecular function regulator|membrane|immune system process|catalytic activity|cellular process|cell junction|localization|response to stimulus|enzyme regulator activity|organic substance metabolic process|cellular metabolic process|positive regulation of immune system process|immune response|membrane-bounded organelle|cell periphery|regulation …	-	-	-	-	6:31982024-32002681	DOWN
ENSG00000144824	PHLDB2	pleckstrin homology like domain family B member 2 [Source:HGNC Symbol;Acc:HGNC:29573]	protein_coding	GO:0040011|GO:0005623|GO:0016020|GO:0032502|GO:0009987|GO:0030054|GO:0051179|GO:0050896|GO:0030055|GO:0007017|GO:0048870|GO:0048856|GO:0033036|GO:0071944|GO:0050793|GO:0016043|GO:0031224|GO:0007155|GO:0040012|GO:0005886|GO:0040013|GO:0005515|GO:0045178|GO:0006950|GO:0030155|GO:0005622|GO:0009653|GO:0009605|GO:0043229|GO:0048646|GO:0044089|GO:0031252|GO:0048523|GO:0050794|GO:1901888|GO:0045184|GO:…	locomotion|cell|membrane|developmental process|cellular process|cell junction|localization|response to stimulus|cell-substrate junction|microtubule-based process|cell motility|anatomical structure development|macromolecule localization|cell periphery|regulation of developmental process|cellular component organization|intrinsic component of membrane|cell adhesion|regulation of locomotion|plasma me…	-	-	-	-	3:111732497-111976517	DOWN
ENSG00000173559	NABP1	nucleic acid binding protein 1 [Source:HGNC Symbol;Acc:HGNC:26232]	protein_coding	GO:0008152|GO:0005623|GO:0032991|GO:0009987|GO:0050896|GO:0071704|GO:0044237|GO:0043227|GO:0043234|GO:0097159|GO:0009628|GO:0000075|GO:0005515|GO:0006950|GO:0005622|GO:0009058|GO:0043229|GO:0006807|GO:0051716|GO:0048523|GO:0050794|GO:0007093|GO:0034641|GO:0006139|GO:0045786|GO:0007049|GO:0051726|GO:0044249|GO:0006725|GO:0009314|GO:0033554|GO:0003676|GO:0046483|GO:0070876|GO:0005737|GO:0043231|GO:…	metabolic process|cell|macromolecular complex|cellular process|response to stimulus|organic substance metabolic process|cellular metabolic process|membrane-bounded organelle|protein complex|organic cyclic compound binding|response to abiotic stimulus|cell cycle checkpoint|protein binding|response to stress|intracellular|biosynthetic process|intracellular organelle|nitrogen compound metabolic proc…	-	-	-	-	2:191678068-191696659	DOWN
ENSG00000269028	MTRNR2L12	MT-RNR2 like 12 [Source:HGNC Symbol;Acc:HGNC:37169]	protein_coding	GO:0005576|GO:0005623|GO:0005622|GO:0005737	extracellular region|cell|intracellular|cytoplasm	-	-	-	-	3:96617188-96618236	DOWN
ENSG00000106546	AHR	aryl hydrocarbon receptor [Source:HGNC Symbol;Acc:HGNC:348]	protein_coding	GO:0023052|GO:0008152|GO:0005623|GO:0032991|GO:0002376|GO:0032502|GO:0009987|GO:0004871|GO:0048511|GO:0050896|GO:0007623|GO:0071704|GO:0044237|GO:0007165|GO:0043227|GO:0048856|GO:0043234|GO:0097159|GO:0002682|GO:0008283|GO:0009892|GO:0004879|GO:0019222|GO:0005515|GO:0004872|GO:0007154|GO:0009893|GO:0005622|GO:0038023|GO:0045321|GO:0009058|GO:0043229|GO:0006807|GO:0043235|GO:0051716|GO:0003700|GO:…	signaling|metabolic process|cell|macromolecular complex|immune system process|developmental process|cellular process|signal transducer activity|rhythmic process|response to stimulus|circadian rhythm|organic substance metabolic process|cellular metabolic process|signal transduction|membrane-bounded organelle|anatomical structure development|protein complex|organic cyclic compound binding|regulatio…	K09093	aryl hydrocarbon receptor[-]	hsa04659	Th17 cell differentiation - Homo sapiens (human)	7:17298622-17346152	DOWN
ENSG00000077238	IL4R	interleukin 4 receptor [Source:HGNC Symbol;Acc:HGNC:6015]	protein_coding	GO:0005576|GO:0023052|GO:0000003|GO:0005623|GO:0022414|GO:0032991|GO:0016020|GO:0002376|GO:0032502|GO:0009987|GO:0051179|GO:0004871|GO:0050896|GO:0002683|GO:0051707|GO:0002684|GO:0007165|GO:0006955|GO:0048856|GO:0033036|GO:0005057|GO:0051641|GO:0071944|GO:0050793|GO:0002682|GO:0008283|GO:0002520|GO:0016043|GO:0031224|GO:0007155|GO:0005886|GO:0005515|GO:0019953|GO:0004872|GO:0007154|GO:0006950|GO:…	extracellular region|signaling|reproduction|cell|reproductive process|macromolecular complex|membrane|immune system process|developmental process|cellular process|localization|signal transducer activity|response to stimulus|negative regulation of immune system process|response to other organism|positive regulation of immune system process|signal transduction|immune response|anatomical structure d…	K05071	interleukin 4 receptor[-]	hsa05200|hsa04151|hsa04060|hsa04630|hsa04659|hsa04640|hsa04658|hsa05321	Pathways in cancer - Homo sapiens (human)|PI3K-Akt signaling pathway - Homo sapiens (human)|Cytokine-cytokine receptor interaction - Homo sapiens (human)|Jak-STAT signaling pathway - Homo sapiens (human)|Th17 cell differentiation - Homo sapiens (human)|Hematopoietic cell lineage - Homo sapiens (human)|Th1 and Th2 cell differentiation - Homo sapiens (human)|Inflammatory bowel disease (IBD) - Homo …	16:27313668-27364778	DOWN
ENSG00000106723	SPIN1	spindlin 1 [Source:HGNC Symbol;Acc:HGNC:11243]	protein_coding	GO:0023052|GO:0008152|GO:0000003|GO:0005623|GO:0022414|GO:0016020|GO:0032502|GO:0009987|GO:0050896|GO:0071704|GO:0044237|GO:0031090|GO:0007165|GO:0043227|GO:0048856|GO:0016043|GO:0019222|GO:0005515|GO:0019953|GO:0007154|GO:0009893|GO:0048609|GO:0005622|GO:0012505|GO:0023051|GO:0009058|GO:0043229|GO:0006807|GO:0051716|GO:0050794|GO:0034641|GO:0005635|GO:0006139|GO:0031323|GO:0007049|GO:0044249|GO:…	signaling|metabolic process|reproduction|cell|reproductive process|membrane|developmental process|cellular process|response to stimulus|organic substance metabolic process|cellular metabolic process|organelle membrane|signal transduction|membrane-bounded organelle|anatomical structure development|cellular component organization|regulation of metabolic process|protein binding|sexual reproduction|c…	-	-	-	-	9:88388419-88478694	DOWN
ENSG00000144802	NFKBIZ	NFKB inhibitor zeta [Source:HGNC Symbol;Acc:HGNC:29805]	protein_coding	GO:0008152|GO:0005623|GO:0032991|GO:0000988|GO:0009987|GO:0050896|GO:0071704|GO:0044237|GO:0000989|GO:1990904|GO:0043227|GO:0019222|GO:0005515|GO:0006950|GO:0005622|GO:0009058|GO:0043229|GO:0006807|GO:0050794|GO:0034641|GO:0006139|GO:0031323|GO:0044249|GO:0006725|GO:0006952|GO:0003712|GO:0046483|GO:0005737|GO:0030529|GO:0043231|GO:0051171|GO:0006954|GO:0036464|GO:0005634|GO:0051252|GO:0031981|GO:…	metabolic process|cell|macromolecular complex|transcription factor activity, protein binding|cellular process|response to stimulus|organic substance metabolic process|cellular metabolic process|transcription factor activity, transcription factor binding|ribonucleoprotein complex|membrane-bounded organelle|regulation of metabolic process|protein binding|response to stress|intracellular|biosyntheti…	K14242	NF-kappa-B inhibitor zeta[-]	hsa05202	Transcriptional misregulation in cancer - Homo sapiens (human)	3:101827991-101861022	DOWN
ENSG00000111711	GOLT1B	golgi transport 1B [Source:HGNC Symbol;Acc:HGNC:20175]	protein_coding	GO:0023052|GO:0005623|GO:0016020|GO:0009987|GO:0051179|GO:0004871|GO:0050896|GO:0031090|GO:0007165|GO:0043227|GO:0033036|GO:0031224|GO:0007154|GO:0005622|GO:0012505|GO:0023051|GO:0043229|GO:0051716|GO:0050794|GO:0045184|GO:0035556|GO:0006810|GO:0016021|GO:0005794|GO:0005783|GO:0010646|GO:0009966|GO:0008104|GO:0005737|GO:0043231|GO:0009967|GO:1902531|GO:0000139|GO:0015031|GO:0071702|GO:0007249|GO:…	signaling|cell|membrane|cellular process|localization|signal transducer activity|response to stimulus|organelle membrane|signal transduction|membrane-bounded organelle|macromolecule localization|intrinsic component of membrane|cell communication|intracellular|endomembrane system|regulation of signaling|intracellular organelle|cellular response to stimulus|regulation of cellular process|establishm…	-	-	-	-	12:21501781-21518408	DOWN
ENSG00000119661	DNAL1	dynein axonemal light chain 1 [Source:HGNC Symbol;Acc:HGNC:23247]	protein_coding	GO:0005623|GO:0032991|GO:0003824|GO:0009987|GO:0007017|GO:0043234|GO:0016043|GO:0042995|GO:0005515|GO:1902494|GO:0005622|GO:0016787|GO:0005929|GO:0043229|GO:0016817|GO:0022607|GO:0097014|GO:0005930|GO:0006996|GO:0030030|GO:0045504|GO:0030286|GO:0000226|GO:0005737|GO:0099512|GO:0008092|GO:0005875|GO:0006461|GO:0044782|GO:0035082|GO:0015631|GO:0070925|GO:0005856|GO:0005858|GO:0016818|GO:0001578|GO:…	cell|macromolecular complex|catalytic activity|cellular process|microtubule-based process|protein complex|cellular component organization|cell projection|protein binding|catalytic complex|intracellular|hydrolase activity|cilium|intracellular organelle|hydrolase activity, acting on acid anhydrides|cellular component assembly|ciliary plasm|axoneme|organelle organization|cell projection organization…	K10411	dynein light chain 1, axonemal[-]	hsa05016	Huntington's disease - Homo sapiens (human)	14:73644875-73703732	DOWN
ENSG00000146072	TNFRSF21	TNF receptor superfamily member 21 [Source:HGNC Symbol;Acc:HGNC:13469]	protein_coding	GO:0023052|GO:0008152|GO:0005623|GO:0016020|GO:0002376|GO:0032502|GO:0009987|GO:0051179|GO:0004871|GO:0050896|GO:0071704|GO:0002683|GO:0051707|GO:0002684|GO:0007165|GO:0006955|GO:0048856|GO:0033036|GO:0071944|GO:0050793|GO:0002682|GO:0008283|GO:0031224|GO:0007155|GO:0019222|GO:0005886|GO:0042995|GO:0004872|GO:0007154|GO:0006950|GO:0030155|GO:0038023|GO:0045321|GO:0002253|GO:0009605|GO:0051051|GO:…	signaling|metabolic process|cell|membrane|immune system process|developmental process|cellular process|localization|signal transducer activity|response to stimulus|organic substance metabolic process|negative regulation of immune system process|response to other organism|positive regulation of immune system process|signal transduction|immune response|anatomical structure development|macromolecule…	K05157	tumor necrosis factor receptor superfamily member 21[-]	hsa04060	Cytokine-cytokine receptor interaction - Homo sapiens (human)	6:47231532-47309905	DOWN
ENSG00000144233	AMMECR1L	AMMECR1 like [Source:HGNC Symbol;Acc:HGNC:28658]	protein_coding	-	-	-	-	-	-	2:127861630-127885922	DOWN
ENSG00000273033	LINC02035	long intergenic non-protein coding RNA 2035 [Source:HGNC Symbol;Acc:HGNC:52875]	lincRNA	-	-	-	-	-	-	3:122886941-122892416	DOWN
ENSG00000172795	DCP2	decapping mRNA 2 [Source:HGNC Symbol;Acc:HGNC:24452]	protein_coding	GO:0008152|GO:0005623|GO:0032991|GO:0003824|GO:0009987|GO:0030054|GO:0051179|GO:0071704|GO:0044237|GO:1990904|GO:0043227|GO:0043167|GO:0033036|GO:0097159|GO:0016043|GO:0009892|GO:0019222|GO:0005515|GO:0005622|GO:0016787|GO:0009058|GO:0043229|GO:0006807|GO:0009056|GO:0048523|GO:0050794|GO:0034641|GO:0031324|GO:0016817|GO:0006139|GO:0031323|GO:0051128|GO:0016788|GO:0044249|GO:0042592|GO:0006725|GO:…	metabolic process|cell|macromolecular complex|catalytic activity|cellular process|cell junction|localization|organic substance metabolic process|cellular metabolic process|ribonucleoprotein complex|membrane-bounded organelle|ion binding|macromolecule localization|organic cyclic compound binding|cellular component organization|negative regulation of metabolic process|regulation of metabolic proces…	K12613	mRNA-decapping enzyme subunit 2[3.6.1.62]	hsa03018	RNA degradation - Homo sapiens (human)	5:112976702-113020970	DOWN
ENSG00000210082	MT-RNR2	mitochondrially encoded 16S RNA [Source:HGNC Symbol;Acc:HGNC:7471]	Mt_rRNA	-	-	K01982	large subunit ribosomal RNA[-]	hsa03010|hsa03008	Ribosome - Homo sapiens (human)|Ribosome biogenesis in eukaryotes - Homo sapiens (human)	MT:1671-3229	DOWN
ENSG00000213846	AC098614.1	tropomyosin 4 (TPM4) pseudogene	transcribed_processed_pseudogene	-	-	-	-	-	-	3:27632976-27635427	DOWN
ENSG00000243649	CFB	complement factor B [Source:HGNC Symbol;Acc:HGNC:1037]	protein_coding	GO:0005576|GO:0008152|GO:0005623|GO:0016020|GO:0002376|GO:0003824|GO:0050896|GO:0071704|GO:0002684|GO:0006955|GO:0043227|GO:0071944|GO:0002682|GO:0019222|GO:0005886|GO:0005515|GO:0006950|GO:0016787|GO:0072562|GO:0002253|GO:0009605|GO:0005615|GO:0006807|GO:0008233|GO:0031982|GO:0050776|GO:0050778|GO:0017171|GO:0006956|GO:0001848|GO:0006952|GO:0006959|GO:0045087|GO:0070062|GO:0019538|GO:0051171|GO:…	extracellular region|metabolic process|cell|membrane|immune system process|catalytic activity|response to stimulus|organic substance metabolic process|positive regulation of immune system process|immune response|membrane-bounded organelle|cell periphery|regulation of immune system process|regulation of metabolic process|plasma membrane|protein binding|response to stress|hydrolase activity|blood m…	-	-	-	-	6:31945650-31952084	DOWN
ENSG00000168685	IL7R	interleukin 7 receptor [Source:HGNC Symbol;Acc:HGNC:6024]	protein_coding	GO:0001906|GO:0005576|GO:0040007|GO:0023052|GO:0008152|GO:0005623|GO:0016020|GO:0002376|GO:0032502|GO:0009987|GO:0004871|GO:0050896|GO:0071704|GO:0044237|GO:0002683|GO:0002684|GO:0007165|GO:0006955|GO:0003823|GO:0001913|GO:0048856|GO:0071944|GO:0050793|GO:0002682|GO:0008283|GO:0002520|GO:0016043|GO:0031224|GO:0007155|GO:0016049|GO:0009986|GO:0019222|GO:0005886|GO:0005515|GO:0004872|GO:0007154|GO:…	cell killing|extracellular region|growth|signaling|metabolic process|cell|membrane|immune system process|developmental process|cellular process|signal transducer activity|response to stimulus|organic substance metabolic process|cellular metabolic process|negative regulation of immune system process|positive regulation of immune system process|signal transduction|immune response|antigen binding|T …	K05072	interleukin 7 receptor[-]	hsa05200|hsa04151|hsa04060|hsa04630|hsa04068|hsa04640|hsa05340	Pathways in cancer - Homo sapiens (human)|PI3K-Akt signaling pathway - Homo sapiens (human)|Cytokine-cytokine receptor interaction - Homo sapiens (human)|Jak-STAT signaling pathway - Homo sapiens (human)|FoxO signaling pathway - Homo sapiens (human)|Hematopoietic cell lineage - Homo sapiens (human)|Primary immunodeficiency - Homo sapiens (human)	5:35852695-35879603	DOWN
ENSG00000082497	SERTAD4	SERTA domain containing 4 [Source:HGNC Symbol;Acc:HGNC:25236]	protein_coding	GO:0005623|GO:0043227|GO:0005622|GO:0043229|GO:0043231|GO:0005634	cell|membrane-bounded organelle|intracellular|intracellular organelle|intracellular membrane-bounded organelle|nucleus	-	-	-	-	1:210232799-210246631	DOWN
ENSG00000074657	ZNF532	zinc finger protein 532 [Source:HGNC Symbol;Acc:HGNC:30940]	protein_coding	GO:0008152|GO:0005623|GO:0009987|GO:0071704|GO:0044237|GO:0043227|GO:0043167|GO:0097159|GO:0019222|GO:0005622|GO:0009058|GO:0043229|GO:0006807|GO:0050794|GO:0034641|GO:0006139|GO:0031323|GO:0044249|GO:0006725|GO:0003676|GO:0046483|GO:0043231|GO:0051171|GO:0043169|GO:0005634|GO:0051252|GO:0046872|GO:0016070|GO:0034645|GO:0010467|GO:0010468|GO:0003677|GO:0006355|GO:2001141|GO:0006351|GO:0032774|GO:…	metabolic process|cell|cellular process|organic substance metabolic process|cellular metabolic process|membrane-bounded organelle|ion binding|organic cyclic compound binding|regulation of metabolic process|intracellular|biosynthetic process|intracellular organelle|nitrogen compound metabolic process|regulation of cellular process|cellular nitrogen compound metabolic process|nucleobase-containing …	-	-	-	-	18:58862600-58986480	DOWN
ENSG00000170677	SOCS6	suppressor of cytokine signaling 6 [Source:HGNC Symbol;Acc:HGNC:16833]	protein_coding	GO:0040007|GO:0023052|GO:0008152|GO:0005623|GO:0098772|GO:0016020|GO:0002376|GO:0009987|GO:0050896|GO:0030234|GO:0071704|GO:0044237|GO:0002683|GO:0007165|GO:0023057|GO:0071944|GO:0002682|GO:0009892|GO:0007155|GO:0019222|GO:0005886|GO:0005515|GO:0007154|GO:0006950|GO:0030155|GO:0005622|GO:0065009|GO:0045321|GO:0023051|GO:0006807|GO:0009056|GO:0051716|GO:0040008|GO:0048523|GO:0050794|GO:0031324|GO:…	growth|signaling|metabolic process|cell|molecular function regulator|membrane|immune system process|cellular process|response to stimulus|enzyme regulator activity|organic substance metabolic process|cellular metabolic process|negative regulation of immune system process|signal transduction|negative regulation of signaling|cell periphery|regulation of immune system process|negative regulation of …	K04699	suppressor of cytokine signaling 6/7[-]	hsa04630|hsa04917	Jak-STAT signaling pathway - Homo sapiens (human)|Prolactin signaling pathway - Homo sapiens (human)	18:70288901-70330200	DOWN
ENSG00000168672	FAM84B	family with sequence similarity 84 member B [Source:HGNC Symbol;Acc:HGNC:24166]	protein_coding	GO:0005623|GO:0016020|GO:0071944|GO:0005886|GO:0005515|GO:0005622|GO:0005737	cell|membrane|cell periphery|plasma membrane|protein binding|intracellular|cytoplasm	-	-	-	-	8:126552442-126558393	DOWN
ENSG00000170485	NPAS2	neuronal PAS domain protein 2 [Source:HGNC Symbol;Acc:HGNC:7895]	protein_coding	GO:0008152|GO:0005623|GO:0032991|GO:0032502|GO:0009987|GO:0048511|GO:0050896|GO:0007623|GO:0071704|GO:0044237|GO:0043227|GO:0043167|GO:0048856|GO:0043234|GO:0097159|GO:0019222|GO:0005515|GO:0009893|GO:0006950|GO:0005622|GO:0051775|GO:0009058|GO:0043229|GO:0006807|GO:0051716|GO:0003700|GO:0048523|GO:0050794|GO:0005667|GO:0034641|GO:0006139|GO:0060548|GO:0031323|GO:0044249|GO:0006725|GO:0008219|GO:…	metabolic process|cell|macromolecular complex|developmental process|cellular process|rhythmic process|response to stimulus|circadian rhythm|organic substance metabolic process|cellular metabolic process|membrane-bounded organelle|ion binding|anatomical structure development|protein complex|organic cyclic compound binding|regulation of metabolic process|protein binding|positive regulation of metab…	K09026	neuronal PAS domain-containing protein 2[-]	hsa04710	Circadian rhythm - Homo sapiens (human)	2:100820152-100996829	DOWN
ENSG00000182585	EPGN	epithelial mitogen [Source:HGNC Symbol;Acc:HGNC:17470]	protein_coding	GO:0005576|GO:0023052|GO:0008152|GO:0005623|GO:0016020|GO:0032502|GO:0009987|GO:0050896|GO:0071704|GO:0044237|GO:0007165|GO:0048856|GO:0071944|GO:0008283|GO:0016043|GO:0031224|GO:0019222|GO:0005886|GO:0005515|GO:0007154|GO:0009893|GO:0005622|GO:0065009|GO:0023051|GO:0009653|GO:0005615|GO:0006807|GO:0048646|GO:0051716|GO:0050794|GO:0090068|GO:0035556|GO:0001568|GO:0048514|GO:0050673|GO:0051130|GO:…	extracellular region|signaling|metabolic process|cell|membrane|developmental process|cellular process|response to stimulus|organic substance metabolic process|cellular metabolic process|signal transduction|anatomical structure development|cell periphery|cell proliferation|cellular component organization|intrinsic component of membrane|regulation of metabolic process|plasma membrane|protein bindin…	-	-	-	-	4:74308473-74315307	DOWN
ENSG00000163235	TGFA	transforming growth factor alpha [Source:HGNC Symbol;Acc:HGNC:11765]	protein_coding	GO:0005576|GO:0023052|GO:0008152|GO:0005623|GO:0016020|GO:0032502|GO:0009987|GO:0051179|GO:0050896|GO:0071704|GO:0044237|GO:0031090|GO:0007165|GO:0043227|GO:0048856|GO:0051641|GO:0071944|GO:0008283|GO:0016043|GO:0031224|GO:0009986|GO:0019222|GO:0005886|GO:0005515|GO:0005789|GO:0007154|GO:0009893|GO:0006950|GO:0005622|GO:0042175|GO:0012505|GO:0065009|GO:0023051|GO:0009653|GO:0005615|GO:0009058|GO:…	extracellular region|signaling|metabolic process|cell|membrane|developmental process|cellular process|localization|response to stimulus|organic substance metabolic process|cellular metabolic process|organelle membrane|signal transduction|membrane-bounded organelle|anatomical structure development|cellular localization|cell periphery|cell proliferation|cellular component organization|intrinsic com…	K08774	transforming growth factor, alpha[-]	hsa05200|hsa04151|hsa04010|hsa04014|hsa05225|hsa05215|hsa04012|hsa01521|hsa05212|hsa05214|hsa05211|hsa05223	Pathways in cancer - Homo sapiens (human)|PI3K-Akt signaling pathway - Homo sapiens (human)|MAPK signaling pathway - Homo sapiens (human)|Ras signaling pathway - Homo sapiens (human)|Hepatocellular carcinoma - Homo sapiens (human)|Prostate cancer - Homo sapiens (human)|ErbB signaling pathway - Homo sapiens (human)|EGFR tyrosine kinase inhibitor resistance - Homo sapiens (human)|Pancreatic cancer …	2:70447280-70554193	DOWN
ENSG00000173432	SAA1	serum amyloid A1 [Source:HGNC Symbol;Acc:HGNC:10513]	protein_coding	GO:0040011|GO:0005576|GO:0023052|GO:0042056|GO:0008152|GO:0005623|GO:0032991|GO:0002376|GO:0009987|GO:0051179|GO:0050896|GO:0097367|GO:0071704|GO:0044237|GO:0007165|GO:0006955|GO:0048870|GO:0043227|GO:0043167|GO:0033036|GO:0034358|GO:0050900|GO:0032994|GO:0007155|GO:0019222|GO:0005515|GO:0007154|GO:0009893|GO:0006950|GO:0030155|GO:0005622|GO:0045785|GO:1904951|GO:0065009|GO:0023051|GO:0009605|GO:…	locomotion|extracellular region|signaling|chemoattractant activity|metabolic process|cell|macromolecular complex|immune system process|cellular process|localization|response to stimulus|carbohydrate derivative binding|organic substance metabolic process|cellular metabolic process|signal transduction|immune response|cell motility|membrane-bounded organelle|ion binding|macromolecule localization|pl…	-	-	-	-	11:18266174-18269977	DOWN
ENSG00000169330	KIAA1024	KIAA1024 [Source:HGNC Symbol;Acc:HGNC:29172]	protein_coding	GO:0016020|GO:0031224|GO:0016021	membrane|intrinsic component of membrane|integral component of membrane	-	-	-	-	15:79432516-79472290	DOWN
ENSG00000238266	LINC00707	long intergenic non-protein coding RNA 707 [Source:HGNC Symbol;Acc:HGNC:44691]	lincRNA	-	-	-	-	-	-	10:6779598-6842906	DOWN
ENSG00000175348	TMEM9B	TMEM9 domain family member B [Source:HGNC Symbol;Acc:HGNC:1168]	protein_coding	GO:0023052|GO:0005623|GO:0016020|GO:0009987|GO:0004871|GO:0050896|GO:0031090|GO:0007165|GO:0043227|GO:0031224|GO:0007154|GO:0005622|GO:0012505|GO:0023051|GO:0043229|GO:0051716|GO:0050794|GO:0035556|GO:0031982|GO:0005768|GO:0016021|GO:0010646|GO:0097708|GO:0009966|GO:0010008|GO:0005737|GO:0043231|GO:0009967|GO:0005774|GO:1902531|GO:0005769|GO:0005773|GO:0007249|GO:0031901|GO:1902533|GO:0031410|GO:…	signaling|cell|membrane|cellular process|signal transducer activity|response to stimulus|organelle membrane|signal transduction|membrane-bounded organelle|intrinsic component of membrane|cell communication|intracellular|endomembrane system|regulation of signaling|intracellular organelle|cellular response to stimulus|regulation of cellular process|intracellular signal transduction|vesicle|endosome…	-	-	-	-	11:8947294-8965011	DOWN
ENSG00000196954	CASP4	caspase 4 [Source:HGNC Symbol;Acc:HGNC:1505]	protein_coding	GO:0005576|GO:0023052|GO:0008152|GO:0005623|GO:0032991|GO:0016020|GO:0002376|GO:0003824|GO:0009987|GO:0050896|GO:0071704|GO:0007165|GO:0006955|GO:0043227|GO:0043234|GO:0071944|GO:0005886|GO:0005515|GO:0005789|GO:0007154|GO:0006950|GO:0005622|GO:0042175|GO:0012505|GO:0016787|GO:0023051|GO:0009605|GO:0043229|GO:0006807|GO:0051716|GO:0050794|GO:0008233|GO:0035556|GO:0061702|GO:0060760|GO:1901698|GO:…	extracellular region|signaling|metabolic process|cell|macromolecular complex|membrane|immune system process|catalytic activity|cellular process|response to stimulus|organic substance metabolic process|signal transduction|immune response|membrane-bounded organelle|protein complex|cell periphery|plasma membrane|protein binding|endoplasmic reticulum membrane|cell communication|response to stress|int…	K04394	caspase 4[3.4.22.57]	hsa04621	NOD-like receptor signaling pathway - Homo sapiens (human)	11:104942866-104969436	DOWN
ENSG00000197142	ACSL5	acyl-CoA synthetase long chain family member 5 [Source:HGNC Symbol;Acc:HGNC:16526]	protein_coding	GO:0008152|GO:0005623|GO:0016020|GO:0003824|GO:0009987|GO:0019867|GO:0097367|GO:0071704|GO:0044237|GO:0031090|GO:0043227|GO:0043167|GO:0097159|GO:0031224|GO:0016874|GO:0005789|GO:0005622|GO:0042175|GO:0012505|GO:0009058|GO:0043229|GO:0036094|GO:0044281|GO:0044249|GO:0016021|GO:0044255|GO:0005783|GO:0006790|GO:0006082|GO:0051186|GO:0031966|GO:0006629|GO:0005737|GO:0000166|GO:0043231|GO:0019866|GO:…	metabolic process|cell|membrane|catalytic activity|cellular process|outer membrane|carbohydrate derivative binding|organic substance metabolic process|cellular metabolic process|organelle membrane|membrane-bounded organelle|ion binding|organic cyclic compound binding|intrinsic component of membrane|ligase activity|endoplasmic reticulum membrane|intracellular|nuclear outer membrane-endoplasmic ret…	K01897	long-chain acyl-CoA synthetase[6.2.1.3]	hsa01100|hsa04146|hsa03320|hsa04920|hsa01212|hsa00071|hsa04216|hsa00061	Metabolic pathways - Homo sapiens (human)|Peroxisome - Homo sapiens (human)|PPAR signaling pathway - Homo sapiens (human)|Adipocytokine signaling pathway - Homo sapiens (human)|Fatty acid metabolism - Homo sapiens (human)|Fatty acid degradation - Homo sapiens (human)|Ferroptosis - Homo sapiens (human)|Fatty acid biosynthesis - Homo sapiens (human)	10:112374018-112428380	DOWN
ENSG00000124942	AHNAK	AHNAK nucleoprotein [Source:HGNC Symbol;Acc:HGNC:347]	protein_coding	GO:0005576|GO:0008152|GO:0005623|GO:0016020|GO:0009987|GO:0030054|GO:0051179|GO:0005198|GO:0071704|GO:0044237|GO:0031090|GO:0030055|GO:0043227|GO:0071944|GO:0097159|GO:0016043|GO:0019222|GO:0005886|GO:0005515|GO:0005622|GO:0097493|GO:0065009|GO:0005615|GO:0043229|GO:0006807|GO:0005911|GO:0050794|GO:0034641|GO:0031982|GO:0098857|GO:0006810|GO:0050839|GO:0006139|GO:0022607|GO:0031323|GO:0044548|GO:…	extracellular region|metabolic process|cell|membrane|cellular process|cell junction|localization|structural molecule activity|organic substance metabolic process|cellular metabolic process|organelle membrane|cell-substrate junction|membrane-bounded organelle|cell periphery|organic cyclic compound binding|cellular component organization|regulation of metabolic process|plasma membrane|protein bindi…	-	-	-	-	11:62433542-62556235	DOWN
ENSG00000282458	WASH5P	WAS protein family homolog 5, pseudogene [Source:HGNC Symbol;Acc:HGNC:33884]	transcribed_processed_pseudogene	-	-	-	-	-	-	19:60951-71626	DOWN
ENSG00000137801	THBS1	thrombospondin 1 [Source:HGNC Symbol;Acc:HGNC:11785]	protein_coding	GO:0040011|GO:0005576|GO:0023052|GO:0008152|GO:0005623|GO:0032991|GO:0016020|GO:0002376|GO:0032502|GO:0009987|GO:0051179|GO:0007610|GO:0050896|GO:0097367|GO:0071704|GO:0044237|GO:0002683|GO:0040017|GO:0002684|GO:0007165|GO:0006955|GO:0048870|GO:0043227|GO:0043167|GO:0048856|GO:0033036|GO:0043234|GO:0023057|GO:0050900|GO:0071944|GO:0050793|GO:0009628|GO:0002682|GO:0008283|GO:0005577|GO:0002520|GO:…	locomotion|extracellular region|signaling|metabolic process|cell|macromolecular complex|membrane|immune system process|developmental process|cellular process|localization|behavior|response to stimulus|carbohydrate derivative binding|organic substance metabolic process|cellular metabolic process|negative regulation of immune system process|positive regulation of locomotion|positive regulation of i…	K16857	thrombospondin 1[-]	hsa04151|hsa05165|hsa05206|hsa04015|hsa05205|hsa04510|hsa04145|hsa04350|hsa04512|hsa04115|hsa05144|hsa05219	PI3K-Akt signaling pathway - Homo sapiens (human)|Human papillomavirus infection - Homo sapiens (human)|MicroRNAs in cancer - Homo sapiens (human)|Rap1 signaling pathway - Homo sapiens (human)|Proteoglycans in cancer - Homo sapiens (human)|Focal adhesion - Homo sapiens (human)|Phagosome - Homo sapiens (human)|TGF-beta signaling pathway - Homo sapiens (human)|ECM-receptor interaction - Homo sapien…	15:39581079-39599466	DOWN
ENSG00000187720	THSD4	thrombospondin type 1 domain containing 4 [Source:HGNC Symbol;Acc:HGNC:25835]	protein_coding	GO:0005576|GO:0008152|GO:0003824|GO:0009987|GO:0071704|GO:0043227|GO:0016043|GO:0031012|GO:0016787|GO:0005615|GO:0006807|GO:0008233|GO:0031982|GO:0022607|GO:0043062|GO:0001527|GO:0005578|GO:0099512|GO:0070062|GO:0019538|GO:1903561|GO:0030198|GO:0006508|GO:0085029|GO:0048251	extracellular region|metabolic process|catalytic activity|cellular process|organic substance metabolic process|membrane-bounded organelle|cellular component organization|extracellular matrix|hydrolase activity|extracellular space|nitrogen compound metabolic process|peptidase activity|vesicle|cellular component assembly|extracellular structure organization|microfibril|proteinaceous extracellular m…	-	-	-	-	15:71096952-71783383	DOWN
ENSG00000224389	C4B	complement C4B (Chido blood group) [Source:HGNC Symbol;Acc:HGNC:1324]	protein_coding	GO:0005576|GO:0045202|GO:0008152|GO:0005623|GO:0098772|GO:0016020|GO:0002376|GO:0003824|GO:0009987|GO:0030054|GO:0051179|GO:0050896|GO:0030234|GO:0071704|GO:0044237|GO:0051707|GO:0002684|GO:0006955|GO:0043227|GO:0071944|GO:0044216|GO:0002682|GO:0016043|GO:0009892|GO:0019222|GO:0005886|GO:0042995|GO:0005515|GO:0030246|GO:0006950|GO:0065009|GO:0016787|GO:0051606|GO:0072562|GO:0002253|GO:0009605|GO:…	extracellular region|synapse|metabolic process|cell|molecular function regulator|membrane|immune system process|catalytic activity|cellular process|cell junction|localization|response to stimulus|enzyme regulator activity|organic substance metabolic process|cellular metabolic process|response to other organism|positive regulation of immune system process|immune response|membrane-bounded organelle…	K03989	complement component 4[-]	hsa05322|hsa04610|hsa05133|hsa05150	Systemic lupus erythematosus - Homo sapiens (human)|Complement and coagulation cascades - Homo sapiens (human)|Pertussis - Homo sapiens (human)|Staphylococcus aureus infection - Homo sapiens (human)	6:32014762-32035418	DOWN
ENSG00000150938	CRIM1	cysteine rich transmembrane BMP regulator 1 [Source:HGNC Symbol;Acc:HGNC:2359]	protein_coding	GO:0005576|GO:0040007|GO:0023052|GO:0008152|GO:0005623|GO:0098772|GO:0016020|GO:0032502|GO:0003824|GO:0009987|GO:0004871|GO:0050896|GO:0030234|GO:0071704|GO:0044237|GO:0007165|GO:0043227|GO:0048856|GO:0071944|GO:0016043|GO:0009892|GO:0031224|GO:0016049|GO:0016740|GO:0019222|GO:0005886|GO:0005515|GO:0004872|GO:0007154|GO:0038023|GO:0065009|GO:0005615|GO:0006807|GO:0051716|GO:0040008|GO:0048523|GO:…	extracellular region|growth|signaling|metabolic process|cell|molecular function regulator|membrane|developmental process|catalytic activity|cellular process|signal transducer activity|response to stimulus|enzyme regulator activity|organic substance metabolic process|cellular metabolic process|signal transduction|membrane-bounded organelle|anatomical structure development|cell periphery|cellular c…	-	-	-	-	2:36355926-36551135	DOWN
ENSG00000135919	SERPINE2	serpin family E member 2 [Source:HGNC Symbol;Acc:HGNC:8951]	protein_coding	GO:0040011|GO:0005576|GO:0045202|GO:0040007|GO:0023052|GO:0008152|GO:0000003|GO:0005623|GO:0022414|GO:0098772|GO:0016020|GO:0032502|GO:0009987|GO:0051179|GO:0007610|GO:0050896|GO:0097367|GO:0030234|GO:0071704|GO:0044237|GO:0007165|GO:0048870|GO:0043227|GO:0043167|GO:0003006|GO:0048856|GO:0023057|GO:0031594|GO:0071944|GO:0050793|GO:0009628|GO:0008283|GO:0016043|GO:0009892|GO:0007155|GO:0016049|GO:…	locomotion|extracellular region|synapse|growth|signaling|metabolic process|reproduction|cell|reproductive process|molecular function regulator|membrane|developmental process|cellular process|localization|behavior|response to stimulus|carbohydrate derivative binding|enzyme regulator activity|organic substance metabolic process|cellular metabolic process|signal transduction|cell motility|membrane-b…	-	-	-	-	2:223975112-224039319	DOWN
ENSG00000137975	CLCA2	chloride channel accessory 2 [Source:HGNC Symbol;Acc:HGNC:2016]	protein_coding	GO:0005576|GO:0008152|GO:0005623|GO:0016020|GO:0003824|GO:0030054|GO:0051179|GO:0005215|GO:0071704|GO:0043227|GO:0043167|GO:0071944|GO:0031224|GO:0007155|GO:0005886|GO:0045178|GO:0004872|GO:0022857|GO:0005622|GO:0016787|GO:0043229|GO:0006807|GO:0008233|GO:0006810|GO:0031226|GO:0009925|GO:0022803|GO:0016021|GO:0043231|GO:0019538|GO:0016323|GO:0043169|GO:0015267|GO:0005887|GO:0015075|GO:0005634|GO:…	extracellular region|metabolic process|cell|membrane|catalytic activity|cell junction|localization|transporter activity|organic substance metabolic process|membrane-bounded organelle|ion binding|cell periphery|intrinsic component of membrane|cell adhesion|plasma membrane|basal part of cell|receptor activity|transmembrane transporter activity|intracellular|hydrolase activity|intracellular organell…	K05028	calcium-activated chloride channel regulator 2[-]	hsa04972|hsa04924	Pancreatic secretion - Homo sapiens (human)|Renin secretion - Homo sapiens (human)	1:86424086-86456558	DOWN
ENSG00000140563	MCTP2	multiple C2 and transmembrane domain containing 2 [Source:HGNC Symbol;Acc:HGNC:25636]	protein_coding	GO:0023052|GO:0005623|GO:0016020|GO:0032502|GO:0009987|GO:0050896|GO:0007165|GO:0043227|GO:0043167|GO:0048856|GO:0031224|GO:0007154|GO:0005622|GO:0012505|GO:0043229|GO:0051716|GO:0050794|GO:0035556|GO:0016021|GO:0005783|GO:0005737|GO:0043231|GO:0007275|GO:0043169|GO:0005634|GO:0046872|GO:0031981|GO:0019932|GO:0005829|GO:0005654|GO:0005509|GO:0019722	signaling|cell|membrane|developmental process|cellular process|response to stimulus|signal transduction|membrane-bounded organelle|ion binding|anatomical structure development|intrinsic component of membrane|cell communication|intracellular|endomembrane system|intracellular organelle|cellular response to stimulus|regulation of cellular process|intracellular signal transduction|integral component …	-	-	-	-	15:94231538-94483952	DOWN
ENSG00000248290	TNXA	tenascin XA (pseudogene) [Source:HGNC Symbol;Acc:HGNC:11975]	unprocessed_pseudogene	-	-	-	-	-	-	6:32008614-32012472	DOWN
ENSG00000283239	KBTBD11-OT1	KBTBD11 overlapping transcript 1 [Source:NCBI gene;Acc:104266957]	protein_coding	GO:0016020|GO:0031224|GO:0016021	membrane|intrinsic component of membrane|integral component of membrane	-	-	-	-	8:1763888-1958627	DOWN
ENSG00000109133	TMEM33	transmembrane protein 33 [Source:HGNC Symbol;Acc:HGNC:25541]	protein_coding	GO:0005576|GO:0023052|GO:0005623|GO:0032991|GO:0016020|GO:0009987|GO:0051179|GO:0005198|GO:0050896|GO:0007165|GO:0043227|GO:0033036|GO:0043234|GO:0051641|GO:0016043|GO:0031224|GO:0005515|GO:0005789|GO:0017056|GO:0007154|GO:0006950|GO:0005622|GO:0042175|GO:0012505|GO:0023051|GO:0005615|GO:0043229|GO:0051716|GO:0050794|GO:0005635|GO:0031982|GO:0022607|GO:0006984|GO:0051128|GO:0016021|GO:0006996|GO:…	extracellular region|signaling|cell|macromolecular complex|membrane|cellular process|localization|structural molecule activity|response to stimulus|signal transduction|membrane-bounded organelle|macromolecule localization|protein complex|cellular localization|cellular component organization|intrinsic component of membrane|protein binding|endoplasmic reticulum membrane|structural constituent of nu…	-	-	-	-	4:41935120-41960572	DOWN
ENSG00000186086	NBPF6	NBPF member 6 [Source:HGNC Symbol;Acc:HGNC:31988]	protein_coding	GO:0005623|GO:0005622|GO:0005737	cell|intracellular|cytoplasm	-	-	-	-	1:108450282-108471002	DOWN
ENSG00000138134	STAMBPL1	STAM binding protein like 1 [Source:HGNC Symbol;Acc:HGNC:24105]	protein_coding	GO:0008152|GO:0005623|GO:0016020|GO:0003824|GO:0009987|GO:0071704|GO:0044237|GO:0043167|GO:0005515|GO:0005622|GO:0016787|GO:0006807|GO:0008233|GO:0101005|GO:0005737|GO:0019538|GO:0043169|GO:0044267|GO:0061578|GO:0046872|GO:0036211|GO:0006508|GO:0005829|GO:0008237|GO:0070646|GO:0006464|GO:0016579|GO:0070536	metabolic process|cell|membrane|catalytic activity|cellular process|organic substance metabolic process|cellular metabolic process|ion binding|protein binding|intracellular|hydrolase activity|nitrogen compound metabolic process|peptidase activity|ubiquitinyl hydrolase activity|cytoplasm|protein metabolic process|cation binding|cellular protein metabolic process|Lys63-specific deubiquitinase activ…	-	-	-	-	10:88879734-88975153	DOWN
ENSG00000177426	TGIF1	TGFB induced factor homeobox 1 [Source:HGNC Symbol;Acc:HGNC:11776]	protein_coding	GO:0008152|GO:0005623|GO:0000988|GO:0032502|GO:0009987|GO:0050896|GO:0071704|GO:0044237|GO:0000989|GO:0043227|GO:0048856|GO:0097159|GO:0009892|GO:0019222|GO:0005515|GO:0005622|GO:0009058|GO:0043229|GO:0006807|GO:0051716|GO:0003700|GO:0048523|GO:0050794|GO:0034641|GO:0031324|GO:0042493|GO:0006139|GO:0031323|GO:0044249|GO:0006725|GO:0003712|GO:0009890|GO:0046332|GO:0003676|GO:0010033|GO:0000981|GO:…	metabolic process|cell|transcription factor activity, protein binding|developmental process|cellular process|response to stimulus|organic substance metabolic process|cellular metabolic process|transcription factor activity, transcription factor binding|membrane-bounded organelle|anatomical structure development|organic cyclic compound binding|negative regulation of metabolic process|regulation of…	K19383	homeobox protein TGIF1[-]	hsa04350	TGF-beta signaling pathway - Homo sapiens (human)	18:3411608-3459978	DOWN
ENSG00000244405	ETV5	ETS variant 5 [Source:HGNC Symbol;Acc:HGNC:3494]	protein_coding	GO:0023052|GO:0008152|GO:0000003|GO:0005623|GO:0022414|GO:0016020|GO:0032502|GO:0009987|GO:0051179|GO:0007610|GO:0050896|GO:0071704|GO:0044237|GO:0043227|GO:0003006|GO:0048856|GO:0033036|GO:0051641|GO:0071944|GO:0050793|GO:0097159|GO:0008283|GO:0016043|GO:0019222|GO:0005886|GO:0007626|GO:0005515|GO:0019953|GO:0007154|GO:0009893|GO:0006950|GO:0048609|GO:0005622|GO:0009653|GO:0009058|GO:0043229|GO:…	signaling|metabolic process|reproduction|cell|reproductive process|membrane|developmental process|cellular process|localization|behavior|response to stimulus|organic substance metabolic process|cellular metabolic process|membrane-bounded organelle|developmental process involved in reproduction|anatomical structure development|macromolecule localization|cellular localization|cell periphery|regulat…	K15593	ets translocation variant 5[-]	hsa05202|hsa05215	Transcriptional misregulation in cancer - Homo sapiens (human)|Prostate cancer - Homo sapiens (human)	3:186046308-186110318	DOWN
ENSG00000198807	PAX9	paired box 9 [Source:HGNC Symbol;Acc:HGNC:8623]	protein_coding	GO:0008152|GO:0005623|GO:0032502|GO:0009987|GO:0050896|GO:0071704|GO:0044237|GO:0043227|GO:0048856|GO:0050793|GO:0097159|GO:0009892|GO:0019222|GO:0005515|GO:0009893|GO:0005622|GO:0009653|GO:0009058|GO:0043229|GO:0006807|GO:0051716|GO:0003700|GO:0048523|GO:0050794|GO:0034641|GO:0031324|GO:0009888|GO:0060325|GO:0006139|GO:0031323|GO:0048513|GO:0044249|GO:0010171|GO:0060322|GO:0006725|GO:0009887|GO:…	metabolic process|cell|developmental process|cellular process|response to stimulus|organic substance metabolic process|cellular metabolic process|membrane-bounded organelle|anatomical structure development|regulation of developmental process|organic cyclic compound binding|negative regulation of metabolic process|regulation of metabolic process|protein binding|positive regulation of metabolic pro…	-	-	-	-	14:36657568-36679715	DOWN
ENSG00000221955	SLC12A8	solute carrier family 12 member 8 [Source:HGNC Symbol;Acc:HGNC:15595]	protein_coding	GO:0016020|GO:0009987|GO:0051179|GO:0005215|GO:0031224|GO:0022857|GO:0006810|GO:0016021|GO:0071804|GO:0015075|GO:0015291|GO:0071805|GO:0006811|GO:0055085|GO:0015293|GO:0006820|GO:0008509|GO:0034220|GO:0008324|GO:0006812|GO:0015672|GO:0015377|GO:0022820|GO:0098655|GO:0030001|GO:0015698|GO:0098656|GO:0022890|GO:0015379|GO:0015108|GO:0006813|GO:0006821|GO:0046873|GO:0015077|GO:0015079|GO:1902476	membrane|cellular process|localization|transporter activity|intrinsic component of membrane|transmembrane transporter activity|transport|integral component of membrane|cellular potassium ion transport|ion transmembrane transporter activity|secondary active transmembrane transporter activity|potassium ion transmembrane transport|ion transport|transmembrane transport|symporter activity|anion transp…	-	-	-	-	3:125082636-125212864	DOWN
ENSG00000185621	LMLN	leishmanolysin like peptidase [Source:HGNC Symbol;Acc:HGNC:15991]	protein_coding	GO:0008152|GO:0005623|GO:0016020|GO:0003824|GO:0009987|GO:0030054|GO:0071704|GO:0030055|GO:0043167|GO:0031224|GO:0007155|GO:0005622|GO:0016787|GO:0043229|GO:0006807|GO:0008233|GO:0007049|GO:0016021|GO:0005912|GO:0005924|GO:0005737|GO:0051301|GO:0019538|GO:0043169|GO:0005811|GO:0046872|GO:0006508|GO:0005925|GO:0005829|GO:0008237|GO:0004175|GO:0004222	metabolic process|cell|membrane|catalytic activity|cellular process|cell junction|organic substance metabolic process|cell-substrate junction|ion binding|intrinsic component of membrane|cell adhesion|intracellular|hydrolase activity|intracellular organelle|nitrogen compound metabolic process|peptidase activity|cell cycle|integral component of membrane|adherens junction|cell-substrate adherens jun…	-	-	-	-	3:197960200-198043720	DOWN
ENSG00000133401	PDZD2	PDZ domain containing 2 [Source:HGNC Symbol;Acc:HGNC:18486]	protein_coding	GO:0005576|GO:0005623|GO:0030054|GO:0043227|GO:0007155|GO:0005622|GO:0012505|GO:0043229|GO:0005911|GO:0005783|GO:0005737|GO:0043231|GO:0005634	extracellular region|cell|cell junction|membrane-bounded organelle|cell adhesion|intracellular|endomembrane system|intracellular organelle|cell-cell junction|endoplasmic reticulum|cytoplasm|intracellular membrane-bounded organelle|nucleus	-	-	-	-	5:31639410-32110931	DOWN
ENSG00000106261	ZKSCAN1	zinc finger with KRAB and SCAN domains 1 [Source:HGNC Symbol;Acc:HGNC:13101]	protein_coding	GO:0008152|GO:0005623|GO:0009987|GO:0071704|GO:0044237|GO:0043227|GO:0043167|GO:0097159|GO:0019222|GO:0005515|GO:0005622|GO:0009058|GO:0043229|GO:0006807|GO:0003700|GO:0050794|GO:0034641|GO:0006139|GO:0031323|GO:0044249|GO:0006725|GO:0003676|GO:0046483|GO:0043231|GO:0051171|GO:0043169|GO:0005634|GO:0051252|GO:0046872|GO:0016070|GO:0034645|GO:0010467|GO:0010468|GO:0003677|GO:0006355|GO:2001141|GO:…	metabolic process|cell|cellular process|organic substance metabolic process|cellular metabolic process|membrane-bounded organelle|ion binding|organic cyclic compound binding|regulation of metabolic process|protein binding|intracellular|biosynthetic process|intracellular organelle|nitrogen compound metabolic process|transcription factor activity, sequence-specific DNA binding|regulation of cellula…	-	-	-	-	7:100015572-100041689	DOWN
ENSG00000185900	POMK	protein-O-mannose kinase [Source:HGNC Symbol;Acc:HGNC:26267]	protein_coding	GO:0040011|GO:0008152|GO:0005623|GO:0016020|GO:0032502|GO:0003824|GO:0009987|GO:0051179|GO:0007610|GO:0097367|GO:0071704|GO:0044237|GO:0048870|GO:0043227|GO:0043167|GO:0048856|GO:0097159|GO:0031224|GO:0016740|GO:0005789|GO:0005622|GO:0042175|GO:0012505|GO:0009058|GO:0043229|GO:0006807|GO:0036094|GO:0044262|GO:0007420|GO:0007611|GO:0005975|GO:0048513|GO:0070085|GO:0044249|GO:1901135|GO:0060322|GO:…	locomotion|metabolic process|cell|membrane|developmental process|catalytic activity|cellular process|localization|behavior|carbohydrate derivative binding|organic substance metabolic process|cellular metabolic process|cell motility|membrane-bounded organelle|ion binding|anatomical structure development|organic cyclic compound binding|intrinsic component of membrane|transferase activity|endoplasmi…	K17547	glycoprotein-mannosyl O6-kinase[2.7.1.183]	hsa01100|hsa00515	Metabolic pathways - Homo sapiens (human)|Mannose type O-glycan biosynthesis - Homo sapiens (human)	8:43093506-43123434	DOWN
ENSG00000136244	IL6	interleukin 6 [Source:HGNC Symbol;Acc:HGNC:6018]	protein_coding	GO:0040011|GO:0005576|GO:0023052|GO:0008152|GO:0005623|GO:0032991|GO:0016020|GO:0002376|GO:0032502|GO:0009987|GO:0051179|GO:0050896|GO:0071704|GO:0044237|GO:0040017|GO:0051707|GO:0002684|GO:0007165|GO:0006955|GO:0048870|GO:0043227|GO:0048856|GO:0033036|GO:0023057|GO:0050900|GO:0051641|GO:0071944|GO:1903829|GO:0050793|GO:0002682|GO:0008283|GO:0002520|GO:0016043|GO:0009892|GO:0031224|GO:0007155|GO:…	locomotion|extracellular region|signaling|metabolic process|cell|macromolecular complex|membrane|immune system process|developmental process|cellular process|localization|response to stimulus|organic substance metabolic process|cellular metabolic process|positive regulation of locomotion|response to other organism|positive regulation of immune system process|signal transduction|immune response|ce…	K05405	interleukin 6[-]	hsa05200|hsa04151|hsa04060|hsa05166|hsa05167|hsa05202|hsa05168|hsa05152|hsa05164|hsa04621|hsa04630|hsa04218|hsa04932|hsa05161|hsa05162|hsa04068|hsa04668|hsa04659|hsa04931|hsa04620|hsa05142|hsa04066|hsa04933|hsa04640|hsa05146|hsa04657|hsa05323|hsa05132|hsa05410|hsa01521|hsa05133|hsa05321|hsa04623|hsa05134|hsa05144|hsa04672|hsa05332|hsa05020|hsa05143|hsa01523	Pathways in cancer - Homo sapiens (human)|PI3K-Akt signaling pathway - Homo sapiens (human)|Cytokine-cytokine receptor interaction - Homo sapiens (human)|HTLV-I infection - Homo sapiens (human)|Kaposi's sarcoma-associated herpesvirus infection - Homo sapiens (human)|Transcriptional misregulation in cancer - Homo sapiens (human)|Herpes simplex infection - Homo sapiens (human)|Tuberculosis - Homo s…	7:22725884-22732002	DOWN
ENSG00000174130	TLR6	toll like receptor 6 [Source:HGNC Symbol;Acc:HGNC:16711]	protein_coding	GO:0023052|GO:0008152|GO:0005623|GO:0032991|GO:0016020|GO:0002376|GO:0009987|GO:0051179|GO:0004871|GO:0050896|GO:0071704|GO:0044237|GO:0002683|GO:0031090|GO:0051707|GO:0002684|GO:0007165|GO:0006955|GO:0043227|GO:0033218|GO:0033036|GO:0023057|GO:0071944|GO:0002682|GO:0016043|GO:0031224|GO:0019222|GO:0005886|GO:0051091|GO:0005515|GO:0004872|GO:0007154|GO:0009893|GO:0006950|GO:0005622|GO:0012505|GO:…	signaling|metabolic process|cell|macromolecular complex|membrane|immune system process|cellular process|localization|signal transducer activity|response to stimulus|organic substance metabolic process|cellular metabolic process|negative regulation of immune system process|organelle membrane|response to other organism|positive regulation of immune system process|signal transduction|immune response…	K10169	toll-like receptor 6[-]	hsa05152|hsa04145|hsa04620|hsa05142	Tuberculosis - Homo sapiens (human)|Phagosome - Homo sapiens (human)|Toll-like receptor signaling pathway - Homo sapiens (human)|Chagas disease (American trypanosomiasis) - Homo sapiens (human)	4:38823715-38856817	DOWN
ENSG00000136158	SPRY2	sprouty RTK signaling antagonist 2 [Source:HGNC Symbol;Acc:HGNC:11270]	protein_coding	GO:0040011|GO:0040007|GO:0023052|GO:0008152|GO:0005623|GO:0098772|GO:0016020|GO:0032502|GO:0009987|GO:0051179|GO:0050896|GO:0030234|GO:0071704|GO:0044237|GO:0040017|GO:0007017|GO:0007165|GO:0048870|GO:0043227|GO:0048856|GO:0023057|GO:0051641|GO:0071944|GO:0050793|GO:0008283|GO:0016043|GO:0009892|GO:0034260|GO:0040012|GO:0019222|GO:0005886|GO:0048589|GO:0042995|GO:0005515|GO:0007154|GO:0009893|GO:…	locomotion|growth|signaling|metabolic process|cell|molecular function regulator|membrane|developmental process|cellular process|localization|response to stimulus|enzyme regulator activity|organic substance metabolic process|cellular metabolic process|positive regulation of locomotion|microtubule-based process|signal transduction|cell motility|membrane-bounded organelle|anatomical structure develo…	K17383	protein sprouty homolog 2[-]	hsa05206	MicroRNAs in cancer - Homo sapiens (human)	13:80335976-80340951	DOWN
ENSG00000073849	ST6GAL1	ST6 beta-galactoside alpha-2,6-sialyltransferase 1 [Source:HGNC Symbol;Acc:HGNC:10860]	protein_coding	GO:0005576|GO:0008152|GO:0005623|GO:0016020|GO:0002376|GO:0003824|GO:0009987|GO:0050896|GO:0071704|GO:0044237|GO:0031090|GO:0006955|GO:0043227|GO:0031224|GO:0016740|GO:0005515|GO:0005622|GO:0012505|GO:0005615|GO:0009058|GO:0043229|GO:0006807|GO:0031982|GO:0005975|GO:0070085|GO:0044281|GO:0044249|GO:1901135|GO:0016021|GO:0005794|GO:0006959|GO:0006082|GO:0016757|GO:0005737|GO:0006486|GO:0043231|GO:…	extracellular region|metabolic process|cell|membrane|immune system process|catalytic activity|cellular process|response to stimulus|organic substance metabolic process|cellular metabolic process|organelle membrane|immune response|membrane-bounded organelle|intrinsic component of membrane|transferase activity|protein binding|intracellular|endomembrane system|extracellular space|biosynthetic proces…	K00778	beta-galactoside alpha-2,6-sialyltransferase (sialyltransferase 1)[2.4.99.1]	hsa01100|hsa00510|hsa00514	Metabolic pathways - Homo sapiens (human)|N-Glycan biosynthesis - Homo sapiens (human)|Other types of O-glycan biosynthesis - Homo sapiens (human)	3:186930485-187078553	DOWN
ENSG00000167460	TPM4	tropomyosin 4 [Source:HGNC Symbol;Acc:HGNC:12013]	protein_coding	GO:0005576|GO:0005623|GO:0032991|GO:0016020|GO:0032502|GO:0009987|GO:0030054|GO:0005198|GO:0030055|GO:0043227|GO:0043167|GO:0043234|GO:0071944|GO:0016043|GO:0044877|GO:0005515|GO:0008307|GO:0005622|GO:0005615|GO:0043229|GO:0031982|GO:0097435|GO:0032403|GO:0001503|GO:0002102|GO:0005862|GO:0030017|GO:0006996|GO:0005912|GO:0031941|GO:0005938|GO:0042802|GO:0005924|GO:0005737|GO:0099512|GO:0030029|GO:…	extracellular region|cell|macromolecular complex|membrane|developmental process|cellular process|cell junction|structural molecule activity|cell-substrate junction|membrane-bounded organelle|ion binding|protein complex|cell periphery|cellular component organization|macromolecular complex binding|protein binding|structural constituent of muscle|intracellular|extracellular space|intracellular organ…	K10375	tropomyosin 4[-]	hsa04261|hsa05414|hsa05410|hsa04260	Adrenergic signaling in cardiomyocytes - Homo sapiens (human)|Dilated cardiomyopathy (DCM) - Homo sapiens (human)|Hypertrophic cardiomyopathy (HCM) - Homo sapiens (human)|Cardiac muscle contraction - Homo sapiens (human)	19:16067021-16103005	DOWN
ENSG00000172985	SH3RF3	SH3 domain containing ring finger 3 [Source:HGNC Symbol;Acc:HGNC:24699]	protein_coding	GO:0043167|GO:0005515|GO:0043169|GO:0046872	ion binding|protein binding|cation binding|metal ion binding	-	-	-	-	2:109129348-109504632	DOWN
ENSG00000120278	PLEKHG1	pleckstrin homology and RhoGEF domain containing G1 [Source:HGNC Symbol;Acc:HGNC:20884]	protein_coding	GO:0023052|GO:0005623|GO:0098772|GO:0009987|GO:0050896|GO:0007165|GO:0043227|GO:0005085|GO:0007154|GO:0005622|GO:0065009|GO:0023051|GO:0043229|GO:0051716|GO:0050794|GO:0035556|GO:0005088|GO:0010646|GO:0009966|GO:0043231|GO:1902531|GO:0005634|GO:0031981|GO:0005089|GO:0007264|GO:0005654|GO:0007265|GO:0051056|GO:0046578|GO:0007266|GO:0035023	signaling|cell|molecular function regulator|cellular process|response to stimulus|signal transduction|membrane-bounded organelle|guanyl-nucleotide exchange factor activity|cell communication|intracellular|regulation of molecular function|regulation of signaling|intracellular organelle|cellular response to stimulus|regulation of cellular process|intracellular signal transduction|Ras guanyl-nucleot…	-	-	-	-	6:150599883-150843665	DOWN
ENSG00000141574	SECTM1	secreted and transmembrane 1 [Source:HGNC Symbol;Acc:HGNC:10707]	protein_coding	GO:0005576|GO:0023052|GO:0005623|GO:0016020|GO:0002376|GO:0032502|GO:0009987|GO:0004871|GO:0050896|GO:0007165|GO:0006955|GO:0043227|GO:0048856|GO:0071944|GO:0031224|GO:0005886|GO:0005515|GO:0007154|GO:0005622|GO:0012505|GO:0065009|GO:0023051|GO:0005615|GO:0043229|GO:0051716|GO:0050794|GO:0035556|GO:0031982|GO:0009888|GO:0005102|GO:0010469|GO:0016021|GO:0005794|GO:0010646|GO:0009966|GO:0005737|GO:…	extracellular region|signaling|cell|membrane|immune system process|developmental process|cellular process|signal transducer activity|response to stimulus|signal transduction|immune response|membrane-bounded organelle|anatomical structure development|cell periphery|intrinsic component of membrane|plasma membrane|protein binding|cell communication|intracellular|endomembrane system|regulation of mol…	-	-	-	-	17:82321024-82334074	DOWN
ENSG00000184185	KCNJ12	potassium voltage-gated channel subfamily J member 12 [Source:HGNC Symbol;Acc:HGNC:6258]	protein_coding	GO:0023052|GO:0005623|GO:0016020|GO:0009987|GO:0051179|GO:0005215|GO:0071944|GO:0016043|GO:0031224|GO:0005886|GO:0004872|GO:0022857|GO:0006810|GO:0022607|GO:0031226|GO:0003013|GO:0022803|GO:0016021|GO:0071804|GO:0003012|GO:0008015|GO:0006461|GO:0015267|GO:0005887|GO:0015075|GO:0006936|GO:0061337|GO:0071805|GO:0043269|GO:0006811|GO:0055085|GO:0008016|GO:0060047|GO:0034765|GO:0051259|GO:0034220|GO:…	signaling|cell|membrane|cellular process|localization|transporter activity|cell periphery|cellular component organization|intrinsic component of membrane|plasma membrane|receptor activity|transmembrane transporter activity|transport|cellular component assembly|intrinsic component of plasma membrane|circulatory system process|passive transmembrane transporter activity|integral component of membran…	K05005	potassium inwardly-rectifying channel subfamily J member 12[-]	hsa04921|hsa04725	Oxytocin signaling pathway - Homo sapiens (human)|Cholinergic synapse - Homo sapiens (human)	17:21376197-21419872	DOWN
ENSG00000236686	BZW1P1	basic leucine zipper and W2 domains 1 pseudogene 1 [Source:HGNC Symbol;Acc:HGNC:31378]	processed_pseudogene	-	-	-	-	-	-	3:172425850-172427089	DOWN
ENSG00000120256	LRP11	LDL receptor related protein 11 [Source:HGNC Symbol;Acc:HGNC:16936]	protein_coding	GO:0005623|GO:0016020|GO:0050896|GO:0071944|GO:0009628|GO:0031224|GO:0005886|GO:0005515|GO:0006950|GO:0009605|GO:0009991|GO:0051219|GO:0033555|GO:0009408|GO:0009266|GO:0016021|GO:0010035|GO:0009414|GO:0009409|GO:0009612|GO:0042594|GO:0035902|GO:0031667	cell|membrane|response to stimulus|cell periphery|response to abiotic stimulus|intrinsic component of membrane|plasma membrane|protein binding|response to stress|response to external stimulus|response to extracellular stimulus|phosphoprotein binding|multicellular organismal response to stress|response to heat|response to temperature stimulus|integral component of membrane|response to inorganic su…	-	-	-	-	6:149818798-149864026	DOWN
ENSG00000175426	PCSK1	proprotein convertase subtilisin/kexin type 1 [Source:HGNC Symbol;Acc:HGNC:8743]	protein_coding	GO:0005576|GO:0023052|GO:0008152|GO:0005623|GO:0003824|GO:0009987|GO:0071704|GO:0044237|GO:0042445|GO:0043227|GO:0005515|GO:0007154|GO:0005622|GO:0012505|GO:0016787|GO:0005615|GO:0009058|GO:0043229|GO:0006807|GO:0008233|GO:0034641|GO:0031982|GO:0031983|GO:0017171|GO:0030133|GO:0044249|GO:0010817|GO:0030141|GO:0042802|GO:0097708|GO:0007267|GO:0016486|GO:0005737|GO:0019538|GO:0051604|GO:0043603|GO:…	extracellular region|signaling|metabolic process|cell|catalytic activity|cellular process|organic substance metabolic process|cellular metabolic process|hormone metabolic process|membrane-bounded organelle|protein binding|cell communication|intracellular|endomembrane system|hydrolase activity|extracellular space|biosynthetic process|intracellular organelle|nitrogen compound metabolic process|pept…	-	-	-	-	5:96390415-96434143	DOWN
ENSG00000137767	SQOR	sulfide quinone oxidoreductase [Source:HGNC Symbol;Acc:HGNC:20390]	protein_coding	GO:0008152|GO:0005623|GO:0016020|GO:0003824|GO:0009987|GO:0044237|GO:0031090|GO:0016491|GO:0043227|GO:0048037|GO:0005622|GO:0043229|GO:0048038|GO:0055114|GO:0016667|GO:0006790|GO:0031966|GO:0005737|GO:0043231|GO:0019866|GO:0005743|GO:0070221|GO:0070813|GO:0005739|GO:0005740|GO:0070224	metabolic process|cell|membrane|catalytic activity|cellular process|cellular metabolic process|organelle membrane|oxidoreductase activity|membrane-bounded organelle|cofactor binding|intracellular|intracellular organelle|quinone binding|oxidation-reduction process|oxidoreductase activity, acting on a sulfur group of donors|sulfur compound metabolic process|mitochondrial membrane|cytoplasm|intracel…	K17218	sulfide:quinone oxidoreductase[1.8.5.4]	hsa00920	Sulfur metabolism - Homo sapiens (human)	15:45631148-45691294	DOWN
ENSG00000173702	MUC13	mucin 13, cell surface associated [Source:HGNC Symbol;Acc:HGNC:7511]	protein_coding	GO:0005576|GO:0023052|GO:0008152|GO:0005623|GO:0016020|GO:0002376|GO:0009987|GO:0050896|GO:0071704|GO:0044237|GO:0002684|GO:0007165|GO:0006955|GO:0043227|GO:0071944|GO:0002682|GO:0031224|GO:0005886|GO:0005515|GO:0007154|GO:0006950|GO:0005622|GO:0012505|GO:0002253|GO:0005615|GO:0009058|GO:0043229|GO:0006807|GO:0051716|GO:0050794|GO:0045177|GO:0007586|GO:0031982|GO:0050776|GO:0050778|GO:0070085|GO:…	extracellular region|signaling|metabolic process|cell|membrane|immune system process|cellular process|response to stimulus|organic substance metabolic process|cellular metabolic process|positive regulation of immune system process|signal transduction|immune response|membrane-bounded organelle|cell periphery|regulation of immune system process|intrinsic component of membrane|plasma membrane|protei…	-	-	-	-	3:124905442-124953819	DOWN
ENSG00000197971	MBP	myelin basic protein [Source:HGNC Symbol;Acc:HGNC:6925]	protein_coding	GO:0023052|GO:0008152|GO:0005623|GO:0032991|GO:0016020|GO:0002376|GO:0032502|GO:0009987|GO:0051179|GO:0005198|GO:0050896|GO:0071704|GO:0044237|GO:0007165|GO:0006955|GO:0043227|GO:0048856|GO:0033036|GO:0043234|GO:0071944|GO:0050793|GO:0044297|GO:0016043|GO:0007155|GO:0019222|GO:0005886|GO:0042995|GO:0005515|GO:0043209|GO:0007154|GO:0009893|GO:0019911|GO:0030155|GO:0005622|GO:1904951|GO:0065009|GO:…	signaling|metabolic process|cell|macromolecular complex|membrane|immune system process|developmental process|cellular process|localization|structural molecule activity|response to stimulus|organic substance metabolic process|cellular metabolic process|signal transduction|immune response|membrane-bounded organelle|anatomical structure development|macromolecule localization|protein complex|cell per…	-	-	-	-	18:76978827-77133683	DOWN
ENSG00000163293	NIPAL1	NIPA like domain containing 1 [Source:HGNC Symbol;Acc:HGNC:27194]	protein_coding	GO:0016020|GO:0051179|GO:0005215|GO:0031224|GO:0022857|GO:0006810|GO:0016021|GO:0015075|GO:0006811|GO:0055085|GO:0034220|GO:0008324|GO:0006812|GO:0098655|GO:0030001|GO:0022890|GO:0072509|GO:0070838|GO:0046873|GO:0015693|GO:0015095|GO:1903830	membrane|localization|transporter activity|intrinsic component of membrane|transmembrane transporter activity|transport|integral component of membrane|ion transmembrane transporter activity|ion transport|transmembrane transport|ion transmembrane transport|cation transmembrane transporter activity|cation transport|cation transmembrane transport|metal ion transport|inorganic cation transmembrane tr…	-	-	-	-	4:47914142-48040173	DOWN
ENSG00000105929	ATP6V0A4	ATPase H+ transporting V0 subunit a4 [Source:HGNC Symbol;Acc:HGNC:866]	protein_coding	GO:0005576|GO:0023052|GO:0008152|GO:0005623|GO:0032991|GO:0016020|GO:0003824|GO:0009987|GO:0051179|GO:0005215|GO:0050896|GO:0071704|GO:0044237|GO:0031090|GO:0007165|GO:0043227|GO:0033036|GO:0043234|GO:0071944|GO:0016043|GO:0031224|GO:0005886|GO:0042995|GO:0005515|GO:0022857|GO:0007154|GO:0005622|GO:0012505|GO:0016787|GO:0005615|GO:0009058|GO:0043229|GO:0006807|GO:0051716|GO:0050794|GO:0045177|GO:…	extracellular region|signaling|metabolic process|cell|macromolecular complex|membrane|catalytic activity|cellular process|localization|transporter activity|response to stimulus|organic substance metabolic process|cellular metabolic process|organelle membrane|signal transduction|membrane-bounded organelle|macromolecule localization|protein complex|cell periphery|cellular component organization|int…	K02154	V-type H+-transporting ATPase subunit a[-]	hsa01100|hsa05165|hsa05152|hsa04145|hsa00190|hsa04142|hsa05323|hsa05120|hsa04721|hsa05110|hsa04966	Metabolic pathways - Homo sapiens (human)|Human papillomavirus infection - Homo sapiens (human)|Tuberculosis - Homo sapiens (human)|Phagosome - Homo sapiens (human)|Oxidative phosphorylation - Homo sapiens (human)|Lysosome - Homo sapiens (human)|Rheumatoid arthritis - Homo sapiens (human)|Epithelial cell signaling in Helicobacter pylori infection - Homo sapiens (human)|Synaptic vesicle cycle - Ho…	7:138706295-138799560	DOWN
ENSG00000176907	TCIM	transcriptional and immune response regulator [Source:HGNC Symbol;Acc:HGNC:1357]	protein_coding	GO:0023052|GO:0008152|GO:0005623|GO:0016020|GO:0002376|GO:0032502|GO:0009987|GO:0051179|GO:0050896|GO:0071704|GO:0044237|GO:0007165|GO:0006955|GO:0043227|GO:0048856|GO:0033036|GO:0023057|GO:0051641|GO:0071944|GO:1903829|GO:0050793|GO:0009628|GO:0002682|GO:0002520|GO:0019222|GO:0005886|GO:0005515|GO:0007154|GO:0009893|GO:0006950|GO:0005622|GO:1904951|GO:0065009|GO:0023051|GO:0009058|GO:0043229|GO:…	signaling|metabolic process|cell|membrane|immune system process|developmental process|cellular process|localization|response to stimulus|organic substance metabolic process|cellular metabolic process|signal transduction|immune response|membrane-bounded organelle|anatomical structure development|macromolecule localization|negative regulation of signaling|cellular localization|cell periphery|positi…	-	-	-	-	8:40153455-40155308	DOWN
ENSG00000135048	CEMIP2	cell migration inducing hyaluronidase 2 [Source:HGNC Symbol;Acc:HGNC:11869]	protein_coding	GO:0005576|GO:0008152|GO:0005623|GO:0016020|GO:0032502|GO:0003824|GO:0009987|GO:0071704|GO:0044237|GO:0043227|GO:0043167|GO:0048856|GO:0071944|GO:0050793|GO:0031224|GO:0005886|GO:0005515|GO:0016787|GO:0009653|GO:0005615|GO:0006807|GO:0009056|GO:0048646|GO:0031982|GO:0001568|GO:0050839|GO:0048514|GO:0031226|GO:0044281|GO:1901135|GO:0016021|GO:0006082|GO:0001525|GO:0016798|GO:0048731|GO:0007275|GO:…	extracellular region|metabolic process|cell|membrane|developmental process|catalytic activity|cellular process|organic substance metabolic process|cellular metabolic process|membrane-bounded organelle|ion binding|anatomical structure development|cell periphery|regulation of developmental process|intrinsic component of membrane|plasma membrane|protein binding|hydrolase activity|anatomical structur…	-	-	-	-	9:71683366-71816690	DOWN
ENSG00000023171	GRAMD1B	GRAM domain containing 1B [Source:HGNC Symbol;Acc:HGNC:29214]	protein_coding	GO:0016020|GO:0031224|GO:0016021	membrane|intrinsic component of membrane|integral component of membrane	-	-	-	-	11:123358428-123627774	DOWN
ENSG00000088756	ARHGAP28	Rho GTPase activating protein 28 [Source:HGNC Symbol;Acc:HGNC:25509]	protein_coding	GO:0023052|GO:0005623|GO:0098772|GO:0009987|GO:0050896|GO:0030234|GO:0007165|GO:0016043|GO:0007154|GO:0005622|GO:0065009|GO:0023051|GO:0051716|GO:0048523|GO:0050794|GO:0035556|GO:0032231|GO:0097435|GO:0008047|GO:0022607|GO:0051128|GO:0032970|GO:0006996|GO:0010646|GO:0009966|GO:0051098|GO:0005737|GO:0030029|GO:0044092|GO:0050790|GO:1902531|GO:0051100|GO:1904424|GO:0030695|GO:1902903|GO:0030036|GO:…	signaling|cell|molecular function regulator|cellular process|response to stimulus|enzyme regulator activity|signal transduction|cellular component organization|cell communication|intracellular|regulation of molecular function|regulation of signaling|cellular response to stimulus|negative regulation of cellular process|regulation of cellular process|intracellular signal transduction|regulation of …	-	-	-	-	18:6729718-6915716	DOWN
ENSG00000267059	AC005943.1	novel transcript, readthrough between UQCR11 and MBD3	protein_coding	-	-	-	-	-	-	19:1578339-1605445	DOWN
ENSG00000130066	SAT1	spermidine/spermine N1-acetyltransferase 1 [Source:HGNC Symbol;Acc:HGNC:10540]	protein_coding	GO:0008152|GO:0005623|GO:0032502|GO:0003824|GO:0009987|GO:0071704|GO:0044237|GO:0043167|GO:0048856|GO:0019808|GO:0008283|GO:0016740|GO:0005515|GO:0005622|GO:0009653|GO:0009058|GO:0006807|GO:0009056|GO:0048646|GO:0050794|GO:0034641|GO:0001568|GO:0048514|GO:0044249|GO:0042802|GO:0001525|GO:0016746|GO:0005737|GO:0048731|GO:0007275|GO:0019809|GO:0042127|GO:0043169|GO:0016747|GO:0008215|GO:0001944|GO:…	metabolic process|cell|developmental process|catalytic activity|cellular process|organic substance metabolic process|cellular metabolic process|ion binding|anatomical structure development|polyamine binding|cell proliferation|transferase activity|protein binding|intracellular|anatomical structure morphogenesis|biosynthetic process|nitrogen compound metabolic process|catabolic process|anatomical s…	K00657	diamine N-acetyltransferase[2.3.1.57]	hsa01100|hsa04216	Metabolic pathways - Homo sapiens (human)|Ferroptosis - Homo sapiens (human)	X:23783173-23786226	DOWN
ENSG00000279342	AP000866.6	novel transcript, sense intronic to MSANTD2	sense_intronic	-	-	-	-	-	-	11:124789240-124792818	DOWN
ENSG00000146166	LGSN	lengsin, lens protein with glutamine synthetase domain [Source:HGNC Symbol;Acc:HGNC:21016]	protein_coding	GO:0008152|GO:0005623|GO:0016020|GO:0003824|GO:0009987|GO:0071704|GO:0044237|GO:0071944|GO:0016874|GO:0005886|GO:0009058|GO:0006807|GO:0006520|GO:0044281|GO:0044249|GO:0006082|GO:0008652|GO:0019752|GO:0006541|GO:0004356|GO:0006542	metabolic process|cell|membrane|catalytic activity|cellular process|organic substance metabolic process|cellular metabolic process|cell periphery|ligase activity|plasma membrane|biosynthetic process|nitrogen compound metabolic process|cellular amino acid metabolic process|small molecule metabolic process|cellular biosynthetic process|organic acid metabolic process|cellular amino acid biosynthetic…	-	-	-	-	6:63275951-63319977	DOWN
ENSG00000166510	CCDC68	coiled-coil domain containing 68 [Source:HGNC Symbol;Acc:HGNC:24350]	protein_coding	GO:0005623|GO:0009987|GO:0051179|GO:0007017|GO:0033036|GO:0016043|GO:0005515|GO:0005622|GO:0043229|GO:0006996|GO:0008104|GO:0000226|GO:0005737|GO:0005815|GO:0005856|GO:0005814|GO:0007010|GO:0034453|GO:0015630|GO:0072393|GO:0034454	cell|cellular process|localization|microtubule-based process|macromolecule localization|cellular component organization|protein binding|intracellular|intracellular organelle|organelle organization|protein localization|microtubule cytoskeleton organization|cytoplasm|microtubule organizing center|cytoskeleton|centriole|cytoskeleton organization|microtubule anchoring|microtubule cytoskeleton|microtu…	-	-	-	-	18:54901509-54959508	DOWN
ENSG00000139211	AMIGO2	adhesion molecule with Ig like domain 2 [Source:HGNC Symbol;Acc:HGNC:24073]	protein_coding	GO:0005623|GO:0016020|GO:0032502|GO:0009987|GO:0043227|GO:0048856|GO:0071944|GO:0050793|GO:0016043|GO:0031224|GO:0007155|GO:0005886|GO:0005515|GO:0005622|GO:0043229|GO:0044089|GO:0048523|GO:0050794|GO:0051130|GO:0022607|GO:0060548|GO:0051128|GO:0050803|GO:0051963|GO:0016021|GO:0008219|GO:0051965|GO:0098609|GO:0010941|GO:0050808|GO:0043231|GO:0048731|GO:0007275|GO:0012501|GO:0043067|GO:0005634|GO:…	cell|membrane|developmental process|cellular process|membrane-bounded organelle|anatomical structure development|cell periphery|regulation of developmental process|cellular component organization|intrinsic component of membrane|cell adhesion|plasma membrane|protein binding|intracellular|intracellular organelle|positive regulation of cellular component biogenesis|negative regulation of cellular pr…	-	-	-	-	12:47075707-47079951	DOWN
ENSG00000147255	IGSF1	immunoglobulin superfamily member 1 [Source:HGNC Symbol;Acc:HGNC:5948]	protein_coding	GO:0005576|GO:0023052|GO:0008152|GO:0016020|GO:0009987|GO:0004871|GO:0050896|GO:0071704|GO:0044237|GO:0007165|GO:0031224|GO:0019222|GO:0005515|GO:0004872|GO:0007154|GO:0038023|GO:0009058|GO:0006807|GO:0051716|GO:0050794|GO:0034641|GO:0034711|GO:0006139|GO:0031323|GO:0044249|GO:0016021|GO:0006725|GO:0015026|GO:0046483|GO:0051171|GO:0051252|GO:0016070|GO:0034645|GO:0010467|GO:0010468|GO:0006355|GO:…	extracellular region|signaling|metabolic process|membrane|cellular process|signal transducer activity|response to stimulus|organic substance metabolic process|cellular metabolic process|signal transduction|intrinsic component of membrane|regulation of metabolic process|protein binding|receptor activity|cell communication|signaling receptor activity|biosynthetic process|nitrogen compound metabolic…	-	-	-	-	X:131273506-131578899	DOWN
ENSG00000254332	AF201337.1	tropomyosin 4 (TPM4) pseudogene	processed_pseudogene	-	-	-	-	-	-	8:69129598-69130345	DOWN
ENSG00000135604	STX11	syntaxin 11 [Source:HGNC Symbol;Acc:HGNC:11429]	protein_coding	GO:0045202|GO:0023052|GO:0005623|GO:0032991|GO:0016020|GO:0009987|GO:0051179|GO:0008021|GO:0098793|GO:0043227|GO:0033036|GO:0043234|GO:0051641|GO:0071944|GO:0016043|GO:0031224|GO:0007269|GO:0005886|GO:0005515|GO:0007154|GO:0005622|GO:0012505|GO:0016079|GO:0031629|GO:0043229|GO:0045184|GO:0032940|GO:0031982|GO:0006810|GO:0031201|GO:0046907|GO:0061024|GO:0030133|GO:0016021|GO:0000149|GO:0005794|GO:…	synapse|signaling|cell|macromolecular complex|membrane|cellular process|localization|synaptic vesicle|presynapse|membrane-bounded organelle|macromolecule localization|protein complex|cellular localization|cell periphery|cellular component organization|intrinsic component of membrane|neurotransmitter secretion|plasma membrane|protein binding|cell communication|intracellular|endomembrane system|syn…	K08487	syntaxin 11[-]	hsa04130	SNARE interactions in vesicular transport - Homo sapiens (human)	6:144150526-144188370	DOWN
ENSG00000165476	REEP3	receptor accessory protein 3 [Source:HGNC Symbol;Acc:HGNC:23711]	protein_coding	GO:0005623|GO:0016020|GO:0009987|GO:0043227|GO:0016043|GO:0031224|GO:0005789|GO:0005622|GO:0042175|GO:0012505|GO:0043229|GO:0007049|GO:0061024|GO:0016021|GO:0006996|GO:0010256|GO:0005783|GO:0005737|GO:0099512|GO:0051301|GO:0043231|GO:0006997|GO:0005856|GO:0000278|GO:0007084|GO:0006998|GO:0031468|GO:0005874|GO:0015630	cell|membrane|cellular process|membrane-bounded organelle|cellular component organization|intrinsic component of membrane|endoplasmic reticulum membrane|intracellular|nuclear outer membrane-endoplasmic reticulum membrane network|endomembrane system|intracellular organelle|cell cycle|membrane organization|integral component of membrane|organelle organization|endomembrane system organization|endopl…	-	-	-	-	10:63521363-63625123	DOWN
ENSG00000141527	CARD14	caspase recruitment domain family member 14 [Source:HGNC Symbol;Acc:HGNC:16446]	protein_coding	GO:0023052|GO:0008152|GO:0005623|GO:0016020|GO:0009987|GO:0050896|GO:0071704|GO:0044237|GO:0007165|GO:0071944|GO:0019222|GO:0005886|GO:0051091|GO:0005515|GO:0007154|GO:0009893|GO:0005622|GO:0065009|GO:0023051|GO:0009058|GO:0006807|GO:0051716|GO:0048523|GO:0050794|GO:0034641|GO:0035556|GO:0006139|GO:0051092|GO:0060548|GO:0031323|GO:0044249|GO:0006725|GO:0008219|GO:0010646|GO:0051090|GO:0019904|GO:…	signaling|metabolic process|cell|membrane|cellular process|response to stimulus|organic substance metabolic process|cellular metabolic process|signal transduction|cell periphery|regulation of metabolic process|plasma membrane|positive regulation of sequence-specific DNA binding transcription factor activity|protein binding|cell communication|positive regulation of metabolic process|intracellular|…	K20913	caspase recruitment domain-containing protein 14[-]	-	-	17:80169992-80209331	DOWN
ENSG00000167842	MIS12	MIS12, kinetochore complex component [Source:HGNC Symbol;Acc:HGNC:24967]	protein_coding	GO:0005623|GO:0032991|GO:0009987|GO:0051179|GO:0043227|GO:0033036|GO:0043234|GO:0051641|GO:0016043|GO:0005515|GO:0005622|GO:0043229|GO:0000776|GO:0022607|GO:0007049|GO:0051656|GO:0006996|GO:0000444|GO:0008608|GO:0007062|GO:0008104|GO:0051640|GO:0005737|GO:0007059|GO:0051301|GO:0043231|GO:0051649|GO:0005694|GO:0051315|GO:0006461|GO:0000819|GO:0000228|GO:0000818|GO:0005634|GO:0007080|GO:0070925|GO:…	cell|macromolecular complex|cellular process|localization|membrane-bounded organelle|macromolecule localization|protein complex|cellular localization|cellular component organization|protein binding|intracellular|intracellular organelle|kinetochore|cellular component assembly|cell cycle|establishment of organelle localization|organelle organization|MIS12/MIND type complex|attachment of spindle mic…	-	-	-	-	17:5486285-5490814	DOWN
ENSG00000198879	SFMBT2	Scm like with four mbt domains 2 [Source:HGNC Symbol;Acc:HGNC:20256]	protein_coding	GO:0008152|GO:0005623|GO:0009987|GO:0071704|GO:0044237|GO:0043227|GO:0009892|GO:0019222|GO:0005515|GO:0005622|GO:0009058|GO:0043229|GO:0006807|GO:0050794|GO:0034641|GO:0006139|GO:0031323|GO:0044249|GO:0016234|GO:0006725|GO:0042393|GO:0046483|GO:0043231|GO:0051171|GO:0010629|GO:0016235|GO:0005634|GO:0051252|GO:0031981|GO:0016070|GO:0034645|GO:0010467|GO:0010468|GO:0005654|GO:0006355|GO:2001141|GO:…	metabolic process|cell|cellular process|organic substance metabolic process|cellular metabolic process|membrane-bounded organelle|negative regulation of metabolic process|regulation of metabolic process|protein binding|intracellular|biosynthetic process|intracellular organelle|nitrogen compound metabolic process|regulation of cellular process|cellular nitrogen compound metabolic process|nucleobas…	-	-	-	-	10:7158624-7411486	DOWN
ENSG00000155324	GRAMD2B	GRAM domain containing 2B [Source:HGNC Symbol;Acc:HGNC:24911]	protein_coding	GO:0005623|GO:0016020|GO:0031224|GO:0005515|GO:0005622|GO:0043229|GO:0016021|GO:0042802|GO:0005737|GO:0099512|GO:0005856|GO:0005881|GO:0005874|GO:0015630	cell|membrane|intrinsic component of membrane|protein binding|intracellular|intracellular organelle|integral component of membrane|identical protein binding|cytoplasm|supramolecular fiber|cytoskeleton|cytoplasmic microtubule|microtubule|microtubule cytoskeleton	-	-	-	-	5:126360132-126496494	DOWN
ENSG00000169247	SH3TC2	SH3 domain and tetratricopeptide repeats 2 [Source:HGNC Symbol;Acc:HGNC:29427]	protein_coding	GO:0023052|GO:0005623|GO:0016020|GO:0032502|GO:0009987|GO:0051179|GO:0050896|GO:0007165|GO:0043227|GO:0048856|GO:0033036|GO:0051641|GO:0071944|GO:0016043|GO:0005886|GO:0007154|GO:0005622|GO:0012505|GO:0023051|GO:0043229|GO:0051716|GO:0050794|GO:0045184|GO:0031982|GO:0005768|GO:0006810|GO:0046907|GO:0061024|GO:0048468|GO:0010256|GO:0010646|GO:0032880|GO:0097708|GO:0009966|GO:0008104|GO:0007166|GO:…	signaling|cell|membrane|developmental process|cellular process|localization|response to stimulus|signal transduction|membrane-bounded organelle|anatomical structure development|macromolecule localization|cellular localization|cell periphery|cellular component organization|plasma membrane|cell communication|intracellular|endomembrane system|regulation of signaling|intracellular organelle|cellular …	-	-	-	-	5:148923639-149063163	DOWN
ENSG00000134107	BHLHE40	basic helix-loop-helix family member e40 [Source:HGNC Symbol;Acc:HGNC:1046]	protein_coding	GO:0008152|GO:0005623|GO:0000988|GO:0009987|GO:0048511|GO:0050896|GO:0007623|GO:0071704|GO:0044237|GO:0000989|GO:0043227|GO:0097159|GO:0009628|GO:0043433|GO:0009892|GO:0019222|GO:0005515|GO:0005622|GO:0065009|GO:0009605|GO:0042752|GO:0009058|GO:0043229|GO:0006807|GO:0003700|GO:0048523|GO:0050794|GO:0034641|GO:0031324|GO:0006139|GO:0031323|GO:0044249|GO:0006725|GO:0003712|GO:0008134|GO:0051090|GO:…	metabolic process|cell|transcription factor activity, protein binding|cellular process|rhythmic process|response to stimulus|circadian rhythm|organic substance metabolic process|cellular metabolic process|transcription factor activity, transcription factor binding|membrane-bounded organelle|organic cyclic compound binding|response to abiotic stimulus|negative regulation of sequence-specific DNA b…	K03729	class B basic helix-loop-helix protein 2[-]	hsa04710	Circadian rhythm - Homo sapiens (human)	3:4979116-4985323	DOWN
ENSG00000134070	IRAK2	interleukin 1 receptor associated kinase 2 [Source:HGNC Symbol;Acc:HGNC:6113]	protein_coding	GO:0023052|GO:0008152|GO:0005623|GO:0016020|GO:0002376|GO:0003824|GO:0009987|GO:0050896|GO:0097367|GO:0071704|GO:0044237|GO:0031090|GO:0051707|GO:0002684|GO:0007165|GO:0006955|GO:0043227|GO:0043167|GO:0071944|GO:0097159|GO:0002682|GO:0043433|GO:0016740|GO:0019222|GO:0005886|GO:0051091|GO:0005515|GO:0007154|GO:0009893|GO:0006950|GO:0005622|GO:0012505|GO:0065009|GO:0023051|GO:0002253|GO:0009605|GO:…	signaling|metabolic process|cell|membrane|immune system process|catalytic activity|cellular process|response to stimulus|carbohydrate derivative binding|organic substance metabolic process|cellular metabolic process|organelle membrane|response to other organism|positive regulation of immune system process|signal transduction|immune response|membrane-bounded organelle|ion binding|cell periphery|or…	K04731	interleukin-1 receptor-associated kinase 2[2.7.11.1]	hsa05152|hsa04722	Tuberculosis - Homo sapiens (human)|Neurotrophin signaling pathway - Homo sapiens (human)	3:10164865-10243743	DOWN
ENSG00000278989	AP001148.1	novel transcript	TEC	-	-	-	-	-	-	11:86434924-86437282	DOWN
ENSG00000089063	TMEM230	transmembrane protein 230 [Source:HGNC Symbol;Acc:HGNC:15876]	protein_coding	GO:0045202|GO:0005623|GO:0016020|GO:0030054|GO:0051179|GO:0008021|GO:0098793|GO:0043227|GO:0051641|GO:0031224|GO:0005622|GO:0012505|GO:0043229|GO:0031982|GO:0005768|GO:0006810|GO:0046907|GO:0030133|GO:0016021|GO:0005794|GO:0051656|GO:0005783|GO:0097708|GO:0051640|GO:0005737|GO:0043231|GO:0051649|GO:0051648|GO:0005769|GO:0051650|GO:0005770|GO:0055037|GO:0005773|GO:0070382|GO:0031410|GO:0016192|GO:…	synapse|cell|membrane|cell junction|localization|synaptic vesicle|presynapse|membrane-bounded organelle|cellular localization|intrinsic component of membrane|intracellular|endomembrane system|intracellular organelle|vesicle|endosome|transport|intracellular transport|transport vesicle|integral component of membrane|Golgi apparatus|establishment of organelle localization|endoplasmic reticulum|intra…	-	-	-	-	20:5068232-5113103	DOWN
ENSG00000213131	YWHAZP4	tyrosine 3-monooxygenase/tryptophan 5-monooxygenase activation protein zeta pseudogene 4 [Source:HGNC Symbol;Acc:HGNC:30851]	processed_pseudogene	-	-	-	-	-	-	6:127355756-127356789	DOWN
ENSG00000135678	CPM	carboxypeptidase M [Source:HGNC Symbol;Acc:HGNC:2311]	protein_coding	GO:0005576|GO:0008152|GO:0005623|GO:0016020|GO:0032502|GO:0003824|GO:0009987|GO:0071704|GO:0044237|GO:0043227|GO:0043167|GO:0048856|GO:0071944|GO:0031224|GO:0009986|GO:0005886|GO:0016787|GO:0009653|GO:0005615|GO:0009058|GO:0006807|GO:0008233|GO:0034641|GO:0031982|GO:0017171|GO:0044249|GO:0016021|GO:0031225|GO:0070062|GO:0019538|GO:1903561|GO:0043169|GO:0044267|GO:0042157|GO:0051604|GO:0046872|GO:…	extracellular region|metabolic process|cell|membrane|developmental process|catalytic activity|cellular process|organic substance metabolic process|cellular metabolic process|membrane-bounded organelle|ion binding|anatomical structure development|cell periphery|intrinsic component of membrane|cell surface|plasma membrane|hydrolase activity|anatomical structure morphogenesis|extracellular space|bio…	-	-	-	-	12:68842197-68971570	DOWN
ENSG00000141682	PMAIP1	phorbol-12-myristate-13-acetate-induced protein 1 [Source:HGNC Symbol;Acc:HGNC:9108]	protein_coding	GO:0023052|GO:0008152|GO:0005623|GO:0016020|GO:0002376|GO:0009987|GO:0051179|GO:0050896|GO:0019867|GO:0071704|GO:0044237|GO:0031090|GO:0051707|GO:0007165|GO:0043227|GO:0033036|GO:0051641|GO:1903829|GO:0009628|GO:0016043|GO:0001776|GO:0019222|GO:0005515|GO:0007154|GO:0009893|GO:0006950|GO:0005622|GO:1904951|GO:0065009|GO:0023051|GO:0009605|GO:0009607|GO:0043229|GO:0006807|GO:0009056|GO:0044089|GO:…	signaling|metabolic process|cell|membrane|immune system process|cellular process|localization|response to stimulus|outer membrane|organic substance metabolic process|cellular metabolic process|organelle membrane|response to other organism|signal transduction|membrane-bounded organelle|macromolecule localization|cellular localization|positive regulation of cellular protein localization|response to…	K10131	phorbol-12-myristate-13-acetate-induced protein 1[-]	hsa05200|hsa05203|hsa04210|hsa01524|hsa05210|hsa04115|hsa04215	Pathways in cancer - Homo sapiens (human)|Viral carcinogenesis - Homo sapiens (human)|Apoptosis - Homo sapiens (human)|Platinum drug resistance - Homo sapiens (human)|Colorectal cancer - Homo sapiens (human)|p53 signaling pathway - Homo sapiens (human)|Apoptosis - multiple species - Homo sapiens (human)	18:59899948-59904306	DOWN
ENSG00000173068	BNC2	basonuclin 2 [Source:HGNC Symbol;Acc:HGNC:30988]	protein_coding	GO:0040007|GO:0008152|GO:0005623|GO:0016020|GO:0032502|GO:0009987|GO:0071704|GO:0044237|GO:0043227|GO:0043167|GO:0048856|GO:0071944|GO:0097159|GO:0019222|GO:0005886|GO:0048589|GO:0005622|GO:0009058|GO:0043229|GO:0006807|GO:0050794|GO:0034641|GO:0009888|GO:0006139|GO:0031323|GO:0048513|GO:0044249|GO:0006725|GO:0007423|GO:0035265|GO:0003676|GO:0046483|GO:0005737|GO:0043231|GO:0048731|GO:0007275|GO:…	growth|metabolic process|cell|membrane|developmental process|cellular process|organic substance metabolic process|cellular metabolic process|membrane-bounded organelle|ion binding|anatomical structure development|cell periphery|organic cyclic compound binding|regulation of metabolic process|plasma membrane|developmental growth|intracellular|biosynthetic process|intracellular organelle|nitrogen co…	-	-	-	-	9:16409503-16870843	DOWN
ENSG00000249709	ZNF564	zinc finger protein 564 [Source:HGNC Symbol;Acc:HGNC:31106]	protein_coding	GO:0008152|GO:0005623|GO:0009987|GO:0071704|GO:0044237|GO:0043227|GO:0043167|GO:0097159|GO:0009892|GO:0019222|GO:0005515|GO:0009893|GO:0005622|GO:0009058|GO:0043229|GO:0006807|GO:0003700|GO:0048523|GO:0050794|GO:0034641|GO:0031324|GO:0006139|GO:0031323|GO:0044249|GO:0006725|GO:0009890|GO:0003676|GO:0046483|GO:0043231|GO:0051171|GO:0031325|GO:0043169|GO:0010629|GO:0005634|GO:0051252|GO:0046872|GO:…	metabolic process|cell|cellular process|organic substance metabolic process|cellular metabolic process|membrane-bounded organelle|ion binding|organic cyclic compound binding|negative regulation of metabolic process|regulation of metabolic process|protein binding|positive regulation of metabolic process|intracellular|biosynthetic process|intracellular organelle|nitrogen compound metabolic process|…	-	-	-	-	19:12525370-12551542	DOWN
ENSG00000086717	PPEF1	protein phosphatase with EF-hand domain 1 [Source:HGNC Symbol;Acc:HGNC:9243]	protein_coding	GO:0023052|GO:0008152|GO:0005623|GO:0003824|GO:0009987|GO:0050896|GO:0071704|GO:0044237|GO:0007165|GO:0043167|GO:0009628|GO:0007154|GO:0005622|GO:0016787|GO:0023051|GO:0051606|GO:0009605|GO:0006807|GO:0051716|GO:0050794|GO:0016788|GO:0007602|GO:0010646|GO:0009314|GO:0009966|GO:0009582|GO:0007186|GO:0050906|GO:0050877|GO:0005737|GO:0019538|GO:0043169|GO:0042578|GO:0044267|GO:0009583|GO:0022400|GO:…	signaling|metabolic process|cell|catalytic activity|cellular process|response to stimulus|organic substance metabolic process|cellular metabolic process|signal transduction|ion binding|response to abiotic stimulus|cell communication|intracellular|hydrolase activity|regulation of signaling|detection of stimulus|response to external stimulus|nitrogen compound metabolic process|cellular response to …	-	-	-	-	X:18675909-18827921	DOWN
ENSG00000116701	NCF2	neutrophil cytosolic factor 2 [Source:HGNC Symbol;Acc:HGNC:7661]	protein_coding	GO:0023052|GO:0008152|GO:0005623|GO:0009055|GO:0032991|GO:0098772|GO:0016020|GO:0002376|GO:0003824|GO:0009987|GO:0051179|GO:0050896|GO:0030234|GO:0044237|GO:0016491|GO:0007165|GO:0006955|GO:0043227|GO:0071944|GO:1990204|GO:0031224|GO:0005886|GO:0005515|GO:1902494|GO:0007154|GO:0006950|GO:0005622|GO:0012505|GO:0065009|GO:0043229|GO:0051716|GO:0019882|GO:0050794|GO:0031982|GO:0006810|GO:0008047|GO:…	signaling|metabolic process|cell|electron carrier activity|macromolecular complex|molecular function regulator|membrane|immune system process|catalytic activity|cellular process|localization|response to stimulus|enzyme regulator activity|cellular metabolic process|oxidoreductase activity|signal transduction|immune response|membrane-bounded organelle|cell periphery|oxidoreductase complex|intrinsic…	K08010	neutrophil cytosolic factor 2[-]	hsa04145|hsa05418|hsa04380|hsa04670|hsa05140	Phagosome - Homo sapiens (human)|Fluid shear stress and atherosclerosis - Homo sapiens (human)|Osteoclast differentiation - Homo sapiens (human)|Leukocyte transendothelial migration - Homo sapiens (human)|Leishmaniasis - Homo sapiens (human)	1:183555563-183590876	DOWN
ENSG00000116016	EPAS1	endothelial PAS domain protein 1 [Source:HGNC Symbol;Acc:HGNC:3374]	protein_coding	GO:0023052|GO:0008152|GO:0000003|GO:0005623|GO:0022414|GO:0032991|GO:0002376|GO:0032502|GO:0009987|GO:0050896|GO:0071704|GO:0044237|GO:0007165|GO:0043227|GO:0003006|GO:0048856|GO:0043234|GO:0097159|GO:0009628|GO:0002520|GO:0016043|GO:0002262|GO:0019222|GO:0005515|GO:0007154|GO:0009893|GO:0006950|GO:0005622|GO:0009653|GO:0009058|GO:0043229|GO:0006807|GO:0048646|GO:0051716|GO:0003700|GO:0050794|GO:…	signaling|metabolic process|reproduction|cell|reproductive process|macromolecular complex|immune system process|developmental process|cellular process|response to stimulus|organic substance metabolic process|cellular metabolic process|signal transduction|membrane-bounded organelle|developmental process involved in reproduction|anatomical structure development|protein complex|organic cyclic compou…	K09095	hypoxia-inducible factor 2 alpha[-]	hsa05200|hsa05211	Pathways in cancer - Homo sapiens (human)|Renal cell carcinoma - Homo sapiens (human)	2:46293667-46386703	DOWN
ENSG00000182831	C16orf72	chromosome 16 open reading frame 72 [Source:HGNC Symbol;Acc:HGNC:30103]	protein_coding	GO:0005515	protein binding	-	-	-	-	16:9091648-9121640	DOWN
ENSG00000163659	TIPARP	TCDD inducible poly(ADP-ribose) polymerase [Source:HGNC Symbol;Acc:HGNC:23696]	protein_coding	GO:0023052|GO:0008152|GO:0000003|GO:0005623|GO:0022414|GO:0002376|GO:0032502|GO:0003824|GO:0009987|GO:0050896|GO:0071704|GO:0044237|GO:0042445|GO:0007165|GO:0043227|GO:0043167|GO:0003006|GO:0048856|GO:0097159|GO:0002520|GO:0009892|GO:0016740|GO:0019222|GO:0007154|GO:0009893|GO:0005622|GO:0009653|GO:0009058|GO:0043229|GO:0006807|GO:0009056|GO:0051716|GO:0050794|GO:0008406|GO:0009888|GO:0060325|GO:…	signaling|metabolic process|reproduction|cell|reproductive process|immune system process|developmental process|catalytic activity|cellular process|response to stimulus|organic substance metabolic process|cellular metabolic process|hormone metabolic process|signal transduction|membrane-bounded organelle|ion binding|developmental process involved in reproduction|anatomical structure development|org…	-	-	-	-	3:156673235-156706770	DOWN
ENSG00000221995	TIAF1	TGFB1-induced anti-apoptotic factor 1 [Source:HGNC Symbol;Acc:HGNC:11803]	protein_coding	GO:0023052|GO:0005623|GO:0009987|GO:0050896|GO:0007165|GO:0043227|GO:0007154|GO:0005622|GO:0043229|GO:0051716|GO:0048523|GO:0050794|GO:0035556|GO:0060548|GO:0008219|GO:0010941|GO:0043231|GO:0012501|GO:0043067|GO:0005634|GO:0043069|GO:0007249|GO:0006915|GO:0043066|GO:0042981	signaling|cell|cellular process|response to stimulus|signal transduction|membrane-bounded organelle|cell communication|intracellular|intracellular organelle|cellular response to stimulus|negative regulation of cellular process|regulation of cellular process|intracellular signal transduction|negative regulation of cell death|cell death|regulation of cell death|intracellular membrane-bounded organe…	-	-	-	-	17:29073521-29078857	DOWN
ENSG00000133687	TMTC1	transmembrane and tetratricopeptide repeat containing 1 [Source:HGNC Symbol;Acc:HGNC:24099]	protein_coding	GO:0008152|GO:0005623|GO:0016020|GO:0009987|GO:0071704|GO:0044237|GO:0043227|GO:0031224|GO:0005622|GO:0043229|GO:0006807|GO:0034641|GO:0006139|GO:0016021|GO:0006725|GO:0046483|GO:0005737|GO:0043231|GO:0005739|GO:0016070|GO:0010467|GO:0006396	metabolic process|cell|membrane|cellular process|organic substance metabolic process|cellular metabolic process|membrane-bounded organelle|intrinsic component of membrane|intracellular|intracellular organelle|nitrogen compound metabolic process|cellular nitrogen compound metabolic process|nucleobase-containing compound metabolic process|integral component of membrane|cellular aromatic compound me…	-	-	-	-	12:29500840-29784759	DOWN
ENSG00000198393	ZNF26	zinc finger protein 26 [Source:HGNC Symbol;Acc:HGNC:13053]	protein_coding	GO:0008152|GO:0005623|GO:0009987|GO:0071704|GO:0044237|GO:0043227|GO:0043167|GO:0097159|GO:0019222|GO:0005515|GO:0005622|GO:0009058|GO:0043229|GO:0006807|GO:0003700|GO:0050794|GO:0034641|GO:0006139|GO:0031323|GO:0044249|GO:0006725|GO:0003676|GO:0046483|GO:0043231|GO:0051171|GO:0043169|GO:0005634|GO:0051252|GO:0046872|GO:0016070|GO:0034645|GO:0010467|GO:0010468|GO:0003677|GO:0006355|GO:2001141|GO:…	metabolic process|cell|cellular process|organic substance metabolic process|cellular metabolic process|membrane-bounded organelle|ion binding|organic cyclic compound binding|regulation of metabolic process|protein binding|intracellular|biosynthetic process|intracellular organelle|nitrogen compound metabolic process|transcription factor activity, sequence-specific DNA binding|regulation of cellula…	-	-	-	-	12:132986365-133032952	DOWN
ENSG00000184500	PROS1	protein S [Source:HGNC Symbol;Acc:HGNC:9456]	protein_coding	GO:0040011|GO:0005576|GO:0008152|GO:0005623|GO:0098772|GO:0016020|GO:0002376|GO:0009987|GO:0051179|GO:0050896|GO:0030234|GO:0071704|GO:0044237|GO:0031090|GO:0002684|GO:0006955|GO:0048870|GO:0043227|GO:0043167|GO:0050900|GO:0051641|GO:0071944|GO:0002682|GO:0009892|GO:0031224|GO:0019222|GO:0005886|GO:0005789|GO:0006950|GO:0005622|GO:0042175|GO:0012505|GO:0065009|GO:0072562|GO:0002253|GO:0009605|GO:…	locomotion|extracellular region|metabolic process|cell|molecular function regulator|membrane|immune system process|cellular process|localization|response to stimulus|enzyme regulator activity|organic substance metabolic process|cellular metabolic process|organelle membrane|positive regulation of immune system process|immune response|cell motility|membrane-bounded organelle|ion binding|leukocyte m…	K03908	protein S[-]	hsa04610	Complement and coagulation cascades - Homo sapiens (human)	3:93873033-93974066	DOWN
ENSG00000003436	TFPI	tissue factor pathway inhibitor [Source:HGNC Symbol;Acc:HGNC:11760]	protein_coding	GO:0005576|GO:0008152|GO:0005623|GO:0098772|GO:0016020|GO:0009987|GO:0050896|GO:0030234|GO:0071704|GO:0044237|GO:0031090|GO:0051707|GO:0043227|GO:0071944|GO:0009892|GO:0031224|GO:0009986|GO:0019222|GO:0005886|GO:0006950|GO:0005622|GO:0012505|GO:0065009|GO:0009605|GO:0005615|GO:0009607|GO:0043229|GO:0006807|GO:0051716|GO:0048523|GO:0050794|GO:0031324|GO:0098857|GO:0031323|GO:0009611|GO:0050817|GO:…	extracellular region|metabolic process|cell|molecular function regulator|membrane|cellular process|response to stimulus|enzyme regulator activity|organic substance metabolic process|cellular metabolic process|organelle membrane|response to other organism|membrane-bounded organelle|cell periphery|negative regulation of metabolic process|intrinsic component of membrane|cell surface|regulation of me…	K03909	tissue factor pathway inhibitor[-]	hsa04610	Complement and coagulation cascades - Homo sapiens (human)	2:187464230-187565760	DOWN
ENSG00000269113	TRABD2B	TraB domain containing 2B [Source:HGNC Symbol;Acc:HGNC:44200]	protein_coding	GO:0005576|GO:0023052|GO:0008152|GO:0005623|GO:0016020|GO:0003824|GO:0009987|GO:0050896|GO:0071704|GO:0044237|GO:0031090|GO:0007165|GO:0043227|GO:0043167|GO:0023057|GO:0071944|GO:0016043|GO:0031224|GO:0019222|GO:0005886|GO:0005515|GO:0007154|GO:0009893|GO:0016787|GO:0023051|GO:0005615|GO:0006807|GO:0044089|GO:0051716|GO:0048523|GO:0050794|GO:0008233|GO:0031982|GO:0051130|GO:0022607|GO:0031323|GO:…	extracellular region|signaling|metabolic process|cell|membrane|catalytic activity|cellular process|response to stimulus|organic substance metabolic process|cellular metabolic process|organelle membrane|signal transduction|membrane-bounded organelle|ion binding|negative regulation of signaling|cell periphery|cellular component organization|intrinsic component of membrane|regulation of metabolic pr…	-	-	-	-	1:47760528-47996895	DOWN
ENSG00000198380	GFPT1	glutamine--fructose-6-phosphate transaminase 1 [Source:HGNC Symbol;Acc:HGNC:4241]	protein_coding	GO:0005576|GO:0023052|GO:0008152|GO:0005623|GO:0003824|GO:0009987|GO:0048511|GO:0050896|GO:0007623|GO:0097367|GO:0071704|GO:0044237|GO:0007165|GO:0043227|GO:0016740|GO:0019222|GO:0007154|GO:0006950|GO:0005622|GO:0005615|GO:0009058|GO:0006807|GO:0051716|GO:0050794|GO:0034641|GO:0031982|GO:0015980|GO:0006139|GO:0006091|GO:0019637|GO:0070085|GO:0006520|GO:0044281|GO:0044249|GO:1901135|GO:0006725|GO:…	extracellular region|signaling|metabolic process|cell|catalytic activity|cellular process|rhythmic process|response to stimulus|circadian rhythm|carbohydrate derivative binding|organic substance metabolic process|cellular metabolic process|signal transduction|membrane-bounded organelle|transferase activity|regulation of metabolic process|cell communication|response to stress|intracellular|extrace…	K00820	glucosamine--fructose-6-phosphate aminotransferase (isomerizing)[2.6.1.16]	hsa01100|hsa04931|hsa00520|hsa00250	Metabolic pathways - Homo sapiens (human)|Insulin resistance - Homo sapiens (human)|Amino sugar and nucleotide sugar metabolism - Homo sapiens (human)|Alanine, aspartate and glutamate metabolism - Homo sapiens (human)	2:69319769-69387254	DOWN
ENSG00000175592	FOSL1	FOS like 1, AP-1 transcription factor subunit [Source:HGNC Symbol;Acc:HGNC:13718]	protein_coding	GO:0040011|GO:0045202|GO:0008152|GO:0000003|GO:0005623|GO:0022414|GO:0016020|GO:0032502|GO:0009987|GO:0007610|GO:0050896|GO:0071704|GO:0044237|GO:0051707|GO:0098793|GO:0043227|GO:0097060|GO:0003006|GO:0048856|GO:0071944|GO:0097159|GO:0009628|GO:0008283|GO:0016043|GO:0019222|GO:0005886|GO:0051091|GO:0042995|GO:0005515|GO:0019953|GO:0007154|GO:0009893|GO:0006950|GO:0048609|GO:0005622|GO:0065009|GO:…	locomotion|synapse|metabolic process|reproduction|cell|reproductive process|membrane|developmental process|cellular process|behavior|response to stimulus|organic substance metabolic process|cellular metabolic process|response to other organism|presynapse|membrane-bounded organelle|synaptic membrane|developmental process involved in reproduction|anatomical structure development|cell periphery|orga…	K04502	fos-like antigen 1[-]	hsa05166|hsa04310|hsa04380|hsa04657	HTLV-I infection - Homo sapiens (human)|Wnt signaling pathway - Homo sapiens (human)|Osteoclast differentiation - Homo sapiens (human)|IL-17 signaling pathway - Homo sapiens (human)	11:65892049-65900573	DOWN
ENSG00000082153	BZW1	basic leucine zipper and W2 domains 1 [Source:HGNC Symbol;Acc:HGNC:18380]	protein_coding	GO:0008152|GO:0005623|GO:0016020|GO:0009987|GO:0071704|GO:0044237|GO:0097159|GO:0019222|GO:0005515|GO:0005622|GO:0009058|GO:0006807|GO:0050794|GO:0034641|GO:0050839|GO:0006139|GO:0031323|GO:0044249|GO:0006725|GO:0003676|GO:0046483|GO:0005737|GO:0051171|GO:0051252|GO:0016070|GO:0045296|GO:0003723|GO:0034645|GO:0010467|GO:0010468|GO:0006355|GO:2001141|GO:0006351|GO:0032774|GO:1903506	metabolic process|cell|membrane|cellular process|organic substance metabolic process|cellular metabolic process|organic cyclic compound binding|regulation of metabolic process|protein binding|intracellular|biosynthetic process|nitrogen compound metabolic process|regulation of cellular process|cellular nitrogen compound metabolic process|cell adhesion molecule binding|nucleobase-containing compoun…	-	-	-	-	2:200810594-200827338	DOWN
ENSG00000171310	CHST11	carbohydrate sulfotransferase 11 [Source:HGNC Symbol;Acc:HGNC:17422]	protein_coding	GO:0040007|GO:0023052|GO:0008152|GO:0005623|GO:0016020|GO:0032502|GO:0003824|GO:0009987|GO:0051179|GO:0050896|GO:0071704|GO:0044237|GO:0031090|GO:0007165|GO:0043227|GO:0048856|GO:0033036|GO:0023057|GO:0008283|GO:0031224|GO:0016740|GO:0048589|GO:0007154|GO:0005622|GO:0012505|GO:0023051|GO:0009653|GO:0009058|GO:0043229|GO:0006807|GO:0051716|GO:0048523|GO:0050794|GO:0009888|GO:0005975|GO:0033037|GO:…	growth|signaling|metabolic process|cell|membrane|developmental process|catalytic activity|cellular process|localization|response to stimulus|organic substance metabolic process|cellular metabolic process|organelle membrane|signal transduction|membrane-bounded organelle|anatomical structure development|macromolecule localization|negative regulation of signaling|cell proliferation|intrinsic compone…	K01017	chondroitin 4-sulfotransferase 11[2.8.2.5]	hsa00532	Glycosaminoglycan biosynthesis - chondroitin sulfate / dermatan sulfate - Homo sapiens (human)	12:104455295-104762014	DOWN
ENSG00000274964	AC026356.1	novel transcript, sense intronic to BICD1	sense_intronic	-	-	-	-	-	-	12:32339368-32340724	DOWN
ENSG00000188641	DPYD	dihydropyrimidine dehydrogenase [Source:HGNC Symbol;Acc:HGNC:3012]	protein_coding	GO:0008152|GO:0005623|GO:0003824|GO:0009987|GO:0071704|GO:0044237|GO:0016491|GO:0043167|GO:0048037|GO:0097159|GO:0005515|GO:0005622|GO:0009058|GO:0006807|GO:0009056|GO:0036094|GO:0034641|GO:0051536|GO:0006139|GO:0006520|GO:0044281|GO:0044249|GO:1901135|GO:0006725|GO:0055114|GO:0042802|GO:0050662|GO:0006082|GO:0016627|GO:0046483|GO:0005737|GO:0000166|GO:1901657|GO:0046983|GO:0043169|GO:0008652|GO:…	metabolic process|cell|catalytic activity|cellular process|organic substance metabolic process|cellular metabolic process|oxidoreductase activity|ion binding|cofactor binding|organic cyclic compound binding|protein binding|intracellular|biosynthetic process|nitrogen compound metabolic process|catabolic process|small molecule binding|cellular nitrogen compound metabolic process|iron-sulfur cluster…	K00207	dihydropyrimidine dehydrogenase (NADP+)[1.3.1.2]	hsa01100|hsa00240|hsa00983|hsa00410|hsa00770	Metabolic pathways - Homo sapiens (human)|Pyrimidine metabolism - Homo sapiens (human)|Drug metabolism - other enzymes - Homo sapiens (human)|beta-Alanine metabolism - Homo sapiens (human)|Pantothenate and CoA biosynthesis - Homo sapiens (human)	1:97077743-97921049	DOWN
ENSG00000162946	DISC1	DISC1 scaffold protein [Source:HGNC Symbol;Acc:HGNC:2888]	protein_coding	GO:0040011|GO:0045202|GO:0023052|GO:0005623|GO:0016020|GO:0032502|GO:0009987|GO:0030054|GO:0051179|GO:0050896|GO:0007017|GO:0007165|GO:0048870|GO:0043227|GO:0097060|GO:0048856|GO:0071944|GO:0050793|GO:0008283|GO:0016043|GO:0098794|GO:0005886|GO:0042995|GO:0005515|GO:0007154|GO:0005622|GO:0065009|GO:0023051|GO:0005929|GO:0043229|GO:0051716|GO:0050794|GO:0045597|GO:0061351|GO:0022607|GO:0032279|GO:…	locomotion|synapse|signaling|cell|membrane|developmental process|cellular process|cell junction|localization|response to stimulus|microtubule-based process|signal transduction|cell motility|membrane-bounded organelle|synaptic membrane|anatomical structure development|cell periphery|regulation of developmental process|cell proliferation|cellular component organization|postsynapse|plasma membrane|c…	-	-	-	-	1:231626815-232041272	DOWN
ENSG00000267194	AC002546.1	-		-	-	-	-	-	-	17:69551358-69553861	DOWN
ENSG00000182326	C1S	complement C1s [Source:HGNC Symbol;Acc:HGNC:1247]	protein_coding	GO:0005576|GO:0008152|GO:0002376|GO:0003824|GO:0050896|GO:0071704|GO:0002684|GO:0006955|GO:0043227|GO:0043167|GO:0002682|GO:0019222|GO:0005515|GO:0006950|GO:0016787|GO:0072562|GO:0002253|GO:0009605|GO:0005615|GO:0006807|GO:0008233|GO:0031982|GO:0050776|GO:0050778|GO:0017171|GO:0006956|GO:0002250|GO:0006952|GO:0042802|GO:0006959|GO:0045087|GO:0070062|GO:0019538|GO:0051171|GO:0002443|GO:1903561|GO:…	extracellular region|metabolic process|immune system process|catalytic activity|response to stimulus|organic substance metabolic process|positive regulation of immune system process|immune response|membrane-bounded organelle|ion binding|regulation of immune system process|regulation of metabolic process|protein binding|response to stress|hydrolase activity|blood microparticle|activation of immune…	K01331	complement component 1, s subcomponent[3.4.21.42]	hsa05322|hsa04610|hsa05133|hsa05150	Systemic lupus erythematosus - Homo sapiens (human)|Complement and coagulation cascades - Homo sapiens (human)|Pertussis - Homo sapiens (human)|Staphylococcus aureus infection - Homo sapiens (human)	12:6988259-7071032	DOWN
ENSG00000248323	LUCAT1	lung cancer associated transcript 1 [Source:HGNC Symbol;Acc:HGNC:48498]	antisense	-	-	-	-	-	-	5:91303029-91314402	DOWN
ENSG00000146242	TPBG	trophoblast glycoprotein [Source:HGNC Symbol;Acc:HGNC:12004]	protein_coding	GO:0005623|GO:0016020|GO:0032502|GO:0009987|GO:0043227|GO:0048856|GO:0071944|GO:0050793|GO:0016043|GO:0031224|GO:0007155|GO:0009986|GO:0005886|GO:0005622|GO:0012505|GO:0043229|GO:0044089|GO:0050794|GO:0051130|GO:0022607|GO:0031226|GO:0051128|GO:0050803|GO:0051963|GO:0016021|GO:0051965|GO:0005783|GO:0050808|GO:0005737|GO:0043231|GO:0048731|GO:0007275|GO:0005887|GO:0007399|GO:0007416|GO:0051960|GO:…	cell|membrane|developmental process|cellular process|membrane-bounded organelle|anatomical structure development|cell periphery|regulation of developmental process|cellular component organization|intrinsic component of membrane|cell adhesion|cell surface|plasma membrane|intracellular|endomembrane system|intracellular organelle|positive regulation of cellular component biogenesis|regulation of cel…	-	-	-	-	6:82363206-82370828	DOWN
ENSG00000103175	WFDC1	WAP four-disulfide core domain 1 [Source:HGNC Symbol;Acc:HGNC:15466]	protein_coding	GO:0005576|GO:0040007|GO:0008152|GO:0098772|GO:0009987|GO:0050896|GO:0030234|GO:0071704|GO:0044237|GO:0008283|GO:0016043|GO:0009892|GO:0016049|GO:0019222|GO:0045926|GO:0006950|GO:0065009|GO:0009605|GO:0005615|GO:0006807|GO:0040008|GO:0048523|GO:0050794|GO:0031324|GO:0042493|GO:0050673|GO:0031323|GO:0009611|GO:0051128|GO:0008285|GO:0006952|GO:0004857|GO:0001558|GO:0010033|GO:0044092|GO:0019538|GO:…	extracellular region|growth|metabolic process|molecular function regulator|cellular process|response to stimulus|enzyme regulator activity|organic substance metabolic process|cellular metabolic process|cell proliferation|cellular component organization|negative regulation of metabolic process|cell growth|regulation of metabolic process|negative regulation of growth|response to stress|regulation o…	-	-	-	-	16:84294646-84329851	DOWN
ENSG00000103472	RRN3P2	RRN3 homolog, RNA polymerase I transcription factor pseudogene 2 [Source:HGNC Symbol;Acc:HGNC:37619]	processed_transcript	-	-	-	-	-	-	16:29074976-29116718	DOWN
ENSG00000139318	DUSP6	dual specificity phosphatase 6 [Source:HGNC Symbol;Acc:HGNC:3072]	protein_coding	GO:0040007|GO:0023052|GO:0008152|GO:0005623|GO:0032502|GO:0003824|GO:0009987|GO:0050896|GO:0071704|GO:0044237|GO:0007165|GO:0043227|GO:0048856|GO:0023057|GO:0050793|GO:0009892|GO:0019222|GO:0048589|GO:0007154|GO:0009893|GO:0006950|GO:0005622|GO:0065009|GO:0016787|GO:0023051|GO:0009653|GO:0043229|GO:0006807|GO:0048646|GO:0051716|GO:0040008|GO:0048523|GO:0050794|GO:0001704|GO:0031324|GO:0035556|GO:…	growth|signaling|metabolic process|cell|developmental process|catalytic activity|cellular process|response to stimulus|organic substance metabolic process|cellular metabolic process|signal transduction|membrane-bounded organelle|anatomical structure development|negative regulation of signaling|regulation of developmental process|negative regulation of metabolic process|regulation of metabolic pro…	K04459	dual specificity MAP kinase phosphatase[3.1.3.48]	hsa04010|hsa05202|hsa05221	MAPK signaling pathway - Homo sapiens (human)|Transcriptional misregulation in cancer - Homo sapiens (human)|Acute myeloid leukemia - Homo sapiens (human)	12:89347232-89353271	DOWN
ENSG00000284461	AC027644.4	novel transcript	protein_coding	GO:0043167|GO:0097159|GO:0003676|GO:0043169|GO:0046872|GO:0003677|GO:0046914|GO:0008270	ion binding|organic cyclic compound binding|nucleic acid binding|cation binding|metal ion binding|DNA binding|transition metal ion binding|zinc ion binding	-	-	-	-	7:66628958-66811459	DOWN
ENSG00000082212	ME2	malic enzyme 2 [Source:HGNC Symbol;Acc:HGNC:6984]	protein_coding	GO:0008152|GO:0005623|GO:0009055|GO:0003824|GO:0009987|GO:0071704|GO:0044237|GO:0016491|GO:0043227|GO:0043167|GO:0016829|GO:0048037|GO:0097159|GO:0019222|GO:0005622|GO:0043229|GO:0006807|GO:0036094|GO:0050794|GO:0034641|GO:0006139|GO:0006091|GO:0031323|GO:0019637|GO:0044281|GO:0006725|GO:0055114|GO:0050662|GO:0006082|GO:0051186|GO:0022900|GO:0046483|GO:0005737|GO:0000166|GO:0043231|GO:0016830|GO:…	metabolic process|cell|electron carrier activity|catalytic activity|cellular process|organic substance metabolic process|cellular metabolic process|oxidoreductase activity|membrane-bounded organelle|ion binding|lyase activity|cofactor binding|organic cyclic compound binding|regulation of metabolic process|intracellular|intracellular organelle|nitrogen compound metabolic process|small molecule bin…	-	-	hsa01200|hsa00620	Carbon metabolism - Homo sapiens (human)|Pyruvate metabolism - Homo sapiens (human)	18:50878734-50954257	DOWN
ENSG00000183579	ZNRF3	zinc and ring finger 3 [Source:HGNC Symbol;Acc:HGNC:18126]	protein_coding	GO:0023052|GO:0008152|GO:0005623|GO:0016020|GO:0032502|GO:0003824|GO:0009987|GO:0050896|GO:0071704|GO:0044237|GO:0007165|GO:0043167|GO:0048856|GO:0023057|GO:0071944|GO:0050793|GO:0008283|GO:0031224|GO:0016740|GO:0005886|GO:0005515|GO:0007154|GO:0023051|GO:0009653|GO:0006807|GO:0009056|GO:0051716|GO:0048523|GO:0050794|GO:0009888|GO:0005102|GO:0048513|GO:0031226|GO:0009968|GO:0072089|GO:0016021|GO:…	signaling|metabolic process|cell|membrane|developmental process|catalytic activity|cellular process|response to stimulus|organic substance metabolic process|cellular metabolic process|signal transduction|ion binding|anatomical structure development|negative regulation of signaling|cell periphery|regulation of developmental process|cell proliferation|intrinsic component of membrane|transferase act…	-	-	-	-	22:28883592-29057487	DOWN
ENSG00000255073	ZFP91-CNTF	ZFP91-CNTF readthrough (NMD candidate) [Source:HGNC Symbol;Acc:HGNC:33441]	protein_coding	GO:0097159|GO:0003676	organic cyclic compound binding|nucleic acid binding	-	-	-	-	11:58579172-58624639	DOWN
ENSG00000198369	SPRED2	sprouty related EVH1 domain containing 2 [Source:HGNC Symbol;Acc:HGNC:17722]	protein_coding	GO:0023052|GO:0008152|GO:0005623|GO:0098772|GO:0016020|GO:0032502|GO:0009987|GO:0050896|GO:0030234|GO:0071704|GO:0044237|GO:0031090|GO:0007165|GO:0043227|GO:0048856|GO:0023057|GO:0071944|GO:0009892|GO:0019222|GO:0005886|GO:0005515|GO:0007154|GO:0006950|GO:0005622|GO:0012505|GO:0065009|GO:0023051|GO:0043229|GO:0006807|GO:0051716|GO:0048523|GO:0050794|GO:0031324|GO:0035556|GO:0031982|GO:0005102|GO:…	signaling|metabolic process|cell|molecular function regulator|membrane|developmental process|cellular process|response to stimulus|enzyme regulator activity|organic substance metabolic process|cellular metabolic process|organelle membrane|signal transduction|membrane-bounded organelle|anatomical structure development|negative regulation of signaling|cell periphery|negative regulation of metabolic…	-	-	-	-	2:65310851-65432637	DOWN
ENSG00000273038	AL365203.2	novel transcript	lincRNA	-	-	-	-	-	-	10:32887255-32889311	DOWN
ENSG00000179776	CDH5	cadherin 5 [Source:HGNC Symbol;Acc:HGNC:1764]	protein_coding	GO:0023052|GO:0005623|GO:0016020|GO:0032502|GO:0009987|GO:0030054|GO:0050896|GO:0007165|GO:0043167|GO:0048856|GO:0071944|GO:0050793|GO:0008283|GO:0016043|GO:0031224|GO:0007155|GO:0009986|GO:0005886|GO:0005515|GO:0007154|GO:0005911|GO:0051716|GO:0048523|GO:0050794|GO:0009888|GO:0045597|GO:0032878|GO:0001568|GO:0009897|GO:0005102|GO:0070160|GO:0044325|GO:0022607|GO:0071559|GO:0016021|GO:0008285|GO:…	signaling|cell|membrane|developmental process|cellular process|cell junction|response to stimulus|signal transduction|ion binding|anatomical structure development|cell periphery|regulation of developmental process|cell proliferation|cellular component organization|intrinsic component of membrane|cell adhesion|cell surface|plasma membrane|protein binding|cell communication|cell-cell junction|cellu…	K06533	cadherin 5, type 2, VE-cadherin[-]	hsa04514|hsa05418|hsa04670	Cell adhesion molecules (CAMs) - Homo sapiens (human)|Fluid shear stress and atherosclerosis - Homo sapiens (human)|Leukocyte transendothelial migration - Homo sapiens (human)	16:66366622-66404786	DOWN
ENSG00000105778	AVL9	AVL9 cell migration associated [Source:HGNC Symbol;Acc:HGNC:28994]	protein_coding	GO:0040011|GO:0005623|GO:0016020|GO:0009987|GO:0051179|GO:0048870|GO:0043227|GO:0031224|GO:0005622|GO:0012505|GO:0043229|GO:0031982|GO:0005768|GO:0016021|GO:0097708|GO:0016477|GO:0005737|GO:0006928|GO:0055037|GO:0031410	locomotion|cell|membrane|cellular process|localization|cell motility|membrane-bounded organelle|intrinsic component of membrane|intracellular|endomembrane system|intracellular organelle|vesicle|endosome|integral component of membrane|intracellular vesicle|cell migration|cytoplasm|movement of cell or subcellular component|recycling endosome|cytoplasmic vesicle	-	-	-	-	7:32495426-32588721	DOWN
ENSG00000184557	SOCS3	suppressor of cytokine signaling 3 [Source:HGNC Symbol;Acc:HGNC:19391]	protein_coding	GO:0040007|GO:0023052|GO:0008152|GO:0000003|GO:0005623|GO:0022414|GO:0098772|GO:0002376|GO:0032502|GO:0009987|GO:0050896|GO:0030234|GO:0071704|GO:0044237|GO:0007165|GO:0006955|GO:0003006|GO:0048856|GO:0023057|GO:0050793|GO:0002682|GO:0009892|GO:0019222|GO:0005515|GO:0007154|GO:0009893|GO:0006950|GO:0005622|GO:0065009|GO:0023051|GO:0009653|GO:0009605|GO:0006807|GO:0051716|GO:0040008|GO:0048523|GO:…	growth|signaling|metabolic process|reproduction|cell|reproductive process|molecular function regulator|immune system process|developmental process|cellular process|response to stimulus|enzyme regulator activity|organic substance metabolic process|cellular metabolic process|signal transduction|immune response|developmental process involved in reproduction|anatomical structure development|negative …	K04696	suppressor of cytokine signaling 3[-]	hsa05168|hsa05164|hsa04630|hsa04932|hsa04910|hsa04120|hsa05160|hsa04380|hsa04668|hsa04931|hsa04917|hsa04920|hsa04930	Herpes simplex infection - Homo sapiens (human)|Influenza A - Homo sapiens (human)|Jak-STAT signaling pathway - Homo sapiens (human)|Non-alcoholic fatty liver disease (NAFLD) - Homo sapiens (human)|Insulin signaling pathway - Homo sapiens (human)|Ubiquitin mediated proteolysis - Homo sapiens (human)|Hepatitis C - Homo sapiens (human)|Osteoclast differentiation - Homo sapiens (human)|TNF signaling…	17:78356778-78360077	DOWN
ENSG00000213903	LTB4R	leukotriene B4 receptor [Source:HGNC Symbol;Acc:HGNC:6713]	protein_coding	GO:0023052|GO:0005623|GO:0016020|GO:0002376|GO:0009987|GO:0004871|GO:0050896|GO:0007165|GO:0006955|GO:0071944|GO:0097159|GO:0031224|GO:0005886|GO:0004872|GO:0007154|GO:0006950|GO:0038023|GO:0051716|GO:0036094|GO:0050794|GO:0098857|GO:0031226|GO:0004888|GO:0016021|GO:0006952|GO:0007186|GO:0000166|GO:0003012|GO:0006928|GO:0007218|GO:0005887|GO:0006954|GO:0061737|GO:0045121|GO:0007200|GO:0006936|GO:…	signaling|cell|membrane|immune system process|cellular process|signal transducer activity|response to stimulus|signal transduction|immune response|cell periphery|organic cyclic compound binding|intrinsic component of membrane|plasma membrane|receptor activity|cell communication|response to stress|signaling receptor activity|cellular response to stimulus|small molecule binding|regulation of cellul…	K04296	leukotriene B4 receptor 1[-]	hsa04080	Neuroactive ligand-receptor interaction - Homo sapiens (human)	14:24311450-24318036	DOWN
ENSG00000172379	ARNT2	aryl hydrocarbon receptor nuclear translocator 2 [Source:HGNC Symbol;Acc:HGNC:16876]	protein_coding	GO:0008152|GO:0005623|GO:0032991|GO:0032502|GO:0009987|GO:0050896|GO:0071704|GO:0044237|GO:0043227|GO:0048856|GO:0043234|GO:0097159|GO:0009628|GO:0008283|GO:0019222|GO:0005515|GO:0009893|GO:0006950|GO:0005622|GO:0009058|GO:0043229|GO:0006807|GO:0051716|GO:0003700|GO:0048523|GO:0050794|GO:0001666|GO:0005667|GO:0034641|GO:0007420|GO:0005102|GO:0006139|GO:0060548|GO:0031323|GO:0048513|GO:0044249|GO:…	metabolic process|cell|macromolecular complex|developmental process|cellular process|response to stimulus|organic substance metabolic process|cellular metabolic process|membrane-bounded organelle|anatomical structure development|protein complex|organic cyclic compound binding|response to abiotic stimulus|cell proliferation|regulation of metabolic process|protein binding|positive regulation of met…	K15589	aryl hydrocarbon receptor nuclear translocator 2[-]	hsa05200|hsa05202|hsa05211	Pathways in cancer - Homo sapiens (human)|Transcriptional misregulation in cancer - Homo sapiens (human)|Renal cell carcinoma - Homo sapiens (human)	15:80404350-80597937	DOWN
ENSG00000090339	ICAM1	intercellular adhesion molecule 1 [Source:HGNC Symbol;Acc:HGNC:5344]	protein_coding	GO:0040011|GO:0001906|GO:0005576|GO:0023052|GO:0008152|GO:0000003|GO:0005623|GO:0022414|GO:0016020|GO:0002376|GO:0032502|GO:0009987|GO:0030054|GO:0051179|GO:0004871|GO:0048511|GO:0050896|GO:0042698|GO:0071704|GO:0044237|GO:0030055|GO:0040017|GO:0051707|GO:0002684|GO:0007165|GO:0006955|GO:0048870|GO:0043227|GO:0003006|GO:0048856|GO:0023057|GO:0050900|GO:0071944|GO:0050793|GO:0009628|GO:0002682|GO:…	locomotion|cell killing|extracellular region|signaling|metabolic process|reproduction|cell|reproductive process|membrane|immune system process|developmental process|cellular process|cell junction|localization|signal transducer activity|rhythmic process|response to stimulus|ovulation cycle|organic substance metabolic process|cellular metabolic process|cell-substrate junction|positive regulation of…	K06490	intercellular adhesion molecule 1[-]	hsa05166|hsa05169|hsa05167|hsa05164|hsa04514|hsa05418|hsa04650|hsa04670|hsa04668|hsa04933|hsa04064|hsa05323|hsa05416|hsa05150|hsa05144|hsa05143	HTLV-I infection - Homo sapiens (human)|Epstein-Barr virus infection - Homo sapiens (human)|Kaposi's sarcoma-associated herpesvirus infection - Homo sapiens (human)|Influenza A - Homo sapiens (human)|Cell adhesion molecules (CAMs) - Homo sapiens (human)|Fluid shear stress and atherosclerosis - Homo sapiens (human)|Natural killer cell mediated cytotoxicity - Homo sapiens (human)|Leukocyte transend…	19:10270835-10286615	DOWN
ENSG00000168297	PXK	PX domain containing serine/threonine kinase like [Source:HGNC Symbol;Acc:HGNC:23326]	protein_coding	GO:0023052|GO:0008152|GO:0005623|GO:0016020|GO:0003824|GO:0009987|GO:0050896|GO:0097367|GO:0071704|GO:0044237|GO:0043167|GO:0071944|GO:0097159|GO:0016740|GO:0005886|GO:0005515|GO:0007154|GO:0006950|GO:0005622|GO:0023051|GO:0008289|GO:0043229|GO:0006807|GO:0036094|GO:0050794|GO:0006952|GO:0005543|GO:0010646|GO:0007267|GO:0016772|GO:0005737|GO:0000166|GO:0050804|GO:0008092|GO:0019538|GO:0044267|GO:…	signaling|metabolic process|cell|membrane|catalytic activity|cellular process|response to stimulus|carbohydrate derivative binding|organic substance metabolic process|cellular metabolic process|ion binding|cell periphery|organic cyclic compound binding|transferase activity|plasma membrane|protein binding|cell communication|response to stress|intracellular|regulation of signaling|lipid binding|int…	-	-	-	-	3:58332880-58426126	DOWN
ENSG00000204397	CARD16	caspase recruitment domain family member 16 [Source:HGNC Symbol;Acc:HGNC:33701]	protein_coding	GO:0023052|GO:0008152|GO:0032991|GO:0098772|GO:0009987|GO:0051179|GO:0050896|GO:0030234|GO:0071704|GO:0044237|GO:0051707|GO:0007165|GO:0033036|GO:0043234|GO:0023057|GO:0009628|GO:0009892|GO:0019222|GO:0051091|GO:0005515|GO:0007154|GO:0006950|GO:0065009|GO:0023051|GO:0009605|GO:0051051|GO:0009607|GO:0009058|GO:0006807|GO:0051716|GO:0048523|GO:0050794|GO:0001666|GO:0001817|GO:0045184|GO:0034641|GO:…	signaling|metabolic process|macromolecular complex|molecular function regulator|cellular process|localization|response to stimulus|enzyme regulator activity|organic substance metabolic process|cellular metabolic process|response to other organism|signal transduction|macromolecule localization|protein complex|negative regulation of signaling|response to abiotic stimulus|negative regulation of meta…	K12806	caspase recruitment domain-containing protein 16/17/18[-]	hsa04621	NOD-like receptor signaling pathway - Homo sapiens (human)	11:105041326-105101431	DOWN
ENSG00000283189	AC104452.1	novel protein	protein_coding	GO:0008152|GO:0005623|GO:0003824|GO:0009987|GO:0032259|GO:0071704|GO:0044237|GO:0043227|GO:0016740|GO:0005622|GO:0043229|GO:0006807|GO:0009056|GO:0006520|GO:0044281|GO:0006082|GO:0005737|GO:0043231|GO:0008168|GO:0008483|GO:0005634|GO:0031981|GO:0005739|GO:0009063|GO:1901565|GO:0005654|GO:0019752|GO:0004047|GO:0046395|GO:0009069|GO:0006544|GO:0009071|GO:0006546	metabolic process|cell|catalytic activity|cellular process|methylation|organic substance metabolic process|cellular metabolic process|membrane-bounded organelle|transferase activity|intracellular|intracellular organelle|nitrogen compound metabolic process|catabolic process|cellular amino acid metabolic process|small molecule metabolic process|organic acid metabolic process|cytoplasm|intracellular…	-	-	-	-	3:49416777-49429314	DOWN
ENSG00000279419	AC004925.1	tec	TEC	-	-	-	-	-	-	7:124742312-124745017	DOWN
ENSG00000168175	MAPK1IP1L	mitogen-activated protein kinase 1 interacting protein 1 like [Source:HGNC Symbol;Acc:HGNC:19840]	protein_coding	GO:0005515	protein binding	-	-	-	-	14:55051631-55070192	DOWN
ENSG00000187678	SPRY4	sprouty RTK signaling antagonist 4 [Source:HGNC Symbol;Acc:HGNC:15533]	protein_coding	GO:0023052|GO:0008152|GO:0005623|GO:0016020|GO:0032502|GO:0009987|GO:0030054|GO:0050896|GO:0071704|GO:0044237|GO:0030055|GO:0007165|GO:0048856|GO:0023057|GO:0071944|GO:0009892|GO:0019222|GO:0005886|GO:0042995|GO:0005515|GO:0007154|GO:0005622|GO:0065009|GO:0023051|GO:0006807|GO:0051716|GO:0031252|GO:0048523|GO:0050794|GO:0031324|GO:0035556|GO:0001726|GO:0031323|GO:0009968|GO:0005912|GO:0010646|GO:…	signaling|metabolic process|cell|membrane|developmental process|cellular process|cell junction|response to stimulus|organic substance metabolic process|cellular metabolic process|cell-substrate junction|signal transduction|anatomical structure development|negative regulation of signaling|cell periphery|negative regulation of metabolic process|regulation of metabolic process|plasma membrane|cell p…	-	-	-	-	5:142310427-142326455	DOWN
ENSG00000168300	PCMTD1	protein-L-isoaspartate (D-aspartate) O-methyltransferase domain containing 1 [Source:HGNC Symbol;Acc:HGNC:30483]	protein_coding	GO:0008152|GO:0005623|GO:0016020|GO:0003824|GO:0009987|GO:0032259|GO:0071704|GO:0044237|GO:0016740|GO:0005622|GO:0006807|GO:0005737|GO:0019538|GO:0044267|GO:0008168|GO:0036211|GO:0006479|GO:0008276|GO:0008757|GO:0008171|GO:0006464|GO:0004719|GO:0051998	metabolic process|cell|membrane|catalytic activity|cellular process|methylation|organic substance metabolic process|cellular metabolic process|transferase activity|intracellular|nitrogen compound metabolic process|cytoplasm|protein metabolic process|cellular protein metabolic process|methyltransferase activity|protein modification process|protein methylation|protein methyltransferase activity|S-a…	-	-	-	-	8:51817575-51899186	DOWN
ENSG00000281406	BLACAT1	bladder cancer associated transcript 1 [Source:HGNC Symbol;Acc:HGNC:48597]	lincRNA	-	-	-	-	-	-	1:205434886-205437879	DOWN
ENSG00000221944	TIGD1	tigger transposable element derived 1 [Source:HGNC Symbol;Acc:HGNC:14523]	protein_coding	GO:0005623|GO:0043227|GO:0097159|GO:0005622|GO:0043229|GO:0003676|GO:0043231|GO:0005634|GO:0003677	cell|membrane-bounded organelle|organic cyclic compound binding|intracellular|intracellular organelle|nucleic acid binding|intracellular membrane-bounded organelle|nucleus|DNA binding	-	-	-	-	2:232547968-232550592	DOWN
ENSG00000266094	RASSF5	Ras association domain family member 5 [Source:HGNC Symbol;Acc:HGNC:17609]	protein_coding	GO:0023052|GO:0008152|GO:0005623|GO:0009987|GO:0051179|GO:0050896|GO:0071704|GO:0044237|GO:0007165|GO:0043227|GO:0043167|GO:0033036|GO:0051641|GO:0008283|GO:0019222|GO:0005515|GO:0007154|GO:0009893|GO:0005622|GO:0043229|GO:0006807|GO:0051716|GO:0048523|GO:0050794|GO:0035556|GO:0031323|GO:0008285|GO:0008219|GO:0032880|GO:0008104|GO:0010941|GO:0005737|GO:0060341|GO:0099512|GO:0043231|GO:0019538|GO:…	signaling|metabolic process|cell|cellular process|localization|response to stimulus|organic substance metabolic process|cellular metabolic process|signal transduction|membrane-bounded organelle|ion binding|macromolecule localization|cellular localization|cell proliferation|regulation of metabolic process|protein binding|cell communication|positive regulation of metabolic process|intracellular|int…	K08015	Ras association domain-containing protein 5[-]	hsa05200|hsa04014|hsa04015|hsa04218|hsa04670|hsa05223	Pathways in cancer - Homo sapiens (human)|Ras signaling pathway - Homo sapiens (human)|Rap1 signaling pathway - Homo sapiens (human)|Cellular senescence - Homo sapiens (human)|Leukocyte transendothelial migration - Homo sapiens (human)|Non-small cell lung cancer - Homo sapiens (human)	1:206507530-206589448	DOWN
ENSG00000124813	RUNX2	runt related transcription factor 2 [Source:HGNC Symbol;Acc:HGNC:10472]	protein_coding	GO:0023052|GO:0008152|GO:0005623|GO:0032991|GO:0002376|GO:0032502|GO:0009987|GO:0050896|GO:0097367|GO:0071704|GO:0044237|GO:0007165|GO:0043227|GO:0043167|GO:0048856|GO:0043234|GO:0023057|GO:0050793|GO:0097159|GO:0008283|GO:0002520|GO:0009892|GO:0003682|GO:0019222|GO:0005515|GO:0007154|GO:0009893|GO:0005622|GO:0045321|GO:0023051|GO:0009653|GO:0009058|GO:0043229|GO:0006807|GO:0051716|GO:0003700|GO:…	signaling|metabolic process|cell|macromolecular complex|immune system process|developmental process|cellular process|response to stimulus|carbohydrate derivative binding|organic substance metabolic process|cellular metabolic process|signal transduction|membrane-bounded organelle|ion binding|anatomical structure development|protein complex|negative regulation of signaling|regulation of development…	K09278	runt-related transcription factor 2[-]	hsa05202	Transcriptional misregulation in cancer - Homo sapiens (human)	6:45328157-45664349	DOWN
ENSG00000281028	AC104662.2	phosphatidylinositol 4-kinase type 2 beta [Source:NCBI gene;Acc:55300]	protein_coding	GO:0008152|GO:0003824|GO:0009987|GO:0044237|GO:0016740|GO:0016772|GO:0006796|GO:0016301|GO:0016310	metabolic process|catalytic activity|cellular process|cellular metabolic process|transferase activity|transferase activity, transferring phosphorus-containing groups|phosphate-containing compound metabolic process|kinase activity|phosphorylation	-	-	-	-	4:25160663-25277306	DOWN
ENSG00000141458	NPC1	NPC intracellular cholesterol transporter 1 [Source:HGNC Symbol;Acc:HGNC:7897]	protein_coding	GO:0005576|GO:0023052|GO:0008152|GO:0005623|GO:0016020|GO:0009987|GO:0051179|GO:0005215|GO:0007610|GO:0004871|GO:0050896|GO:0071704|GO:0044237|GO:0031090|GO:0007165|GO:0043227|GO:0097006|GO:0033036|GO:0051641|GO:0071944|GO:0097159|GO:0016043|GO:0009892|GO:0031224|GO:0019222|GO:0005886|GO:0007626|GO:0005515|GO:0004872|GO:0007154|GO:0005622|GO:0012505|GO:0038023|GO:0008289|GO:0005615|GO:0009058|GO:…	extracellular region|signaling|metabolic process|cell|membrane|cellular process|localization|transporter activity|behavior|signal transducer activity|response to stimulus|organic substance metabolic process|cellular metabolic process|organelle membrane|signal transduction|membrane-bounded organelle|regulation of plasma lipoprotein particle levels|macromolecule localization|cellular localization|c…	K12385	Niemann-Pick C1 protein[-]	hsa04142|hsa04979	Lysosome - Homo sapiens (human)|Cholesterol metabolism - Homo sapiens (human)	18:23506184-23586898	DOWN
ENSG00000272869	AC008575.2	-		GO:0005623|GO:0032991|GO:0009987|GO:0051179|GO:1990904|GO:0033036|GO:0051641|GO:0097159|GO:0016043|GO:0005622|GO:0045184|GO:0006810|GO:0022607|GO:0046907|GO:0008104|GO:0003676|GO:0005737|GO:0030529|GO:0051649|GO:0006461|GO:0048500|GO:0015031|GO:0071702|GO:0006886|GO:0072594|GO:0003723|GO:0034613|GO:0090150|GO:0055085|GO:0006612|GO:0008312|GO:0015833|GO:0071806|GO:0043623|GO:0005786|GO:0042886|GO:…	cell|macromolecular complex|cellular process|localization|ribonucleoprotein complex|macromolecule localization|cellular localization|organic cyclic compound binding|cellular component organization|intracellular|establishment of protein localization|transport|cellular component assembly|intracellular transport|protein localization|nucleic acid binding|cytoplasm|intracellular ribonucleoprotein comp…	-	-	-	-	5:112861188-112893079	DOWN
ENSG00000120875	DUSP4	dual specificity phosphatase 4 [Source:HGNC Symbol;Acc:HGNC:3070]	protein_coding	GO:0023052|GO:0008152|GO:0005623|GO:0032502|GO:0003824|GO:0009987|GO:0050896|GO:0071704|GO:0044237|GO:0007165|GO:0043227|GO:0048856|GO:0023057|GO:0009892|GO:0019222|GO:0007154|GO:0005622|GO:0065009|GO:0016787|GO:0023051|GO:0009653|GO:0043229|GO:0006807|GO:0048646|GO:0051716|GO:0048523|GO:0050794|GO:0001704|GO:0031324|GO:0035556|GO:0009888|GO:0031323|GO:0016788|GO:0009968|GO:0010646|GO:0009966|GO:…	signaling|metabolic process|cell|developmental process|catalytic activity|cellular process|response to stimulus|organic substance metabolic process|cellular metabolic process|signal transduction|membrane-bounded organelle|anatomical structure development|negative regulation of signaling|negative regulation of metabolic process|regulation of metabolic process|cell communication|intracellular|regul…	K04459	dual specificity MAP kinase phosphatase[3.1.3.48]	hsa04010	MAPK signaling pathway - Homo sapiens (human)	8:29333064-29350668	DOWN
ENSG00000134533	RERG	RAS like estrogen regulated growth inhibitor [Source:HGNC Symbol;Acc:HGNC:15980]	protein_coding	GO:0040007|GO:0023052|GO:0005623|GO:0016020|GO:0003824|GO:0009987|GO:0050896|GO:0097367|GO:0007165|GO:0043227|GO:0043167|GO:0097159|GO:0008283|GO:0016043|GO:0016049|GO:0005515|GO:0045926|GO:0007154|GO:0005622|GO:0016787|GO:0043229|GO:0051716|GO:0040008|GO:0048523|GO:0036094|GO:0050794|GO:0035556|GO:0016817|GO:0005102|GO:0051128|GO:0008285|GO:0001882|GO:0001558|GO:0010033|GO:0009725|GO:0005737|GO:…	growth|signaling|cell|membrane|catalytic activity|cellular process|response to stimulus|carbohydrate derivative binding|signal transduction|membrane-bounded organelle|ion binding|organic cyclic compound binding|cell proliferation|cellular component organization|cell growth|protein binding|negative regulation of growth|cell communication|intracellular|hydrolase activity|intracellular organelle|cel…	-	-	-	-	12:15107783-15348675	DOWN
ENSG00000198326	TMEM239	transmembrane protein 239 [Source:HGNC Symbol;Acc:HGNC:40044]	protein_coding	GO:0016020|GO:0031224|GO:0005515|GO:0016021	membrane|intrinsic component of membrane|protein binding|integral component of membrane	-	-	-	-	20:2816302-2820284	DOWN
ENSG00000176438	SYNE3	spectrin repeat containing nuclear envelope family member 3 [Source:HGNC Symbol;Acc:HGNC:19861]	protein_coding	GO:0005623|GO:0032991|GO:0016020|GO:0032502|GO:0009987|GO:0051179|GO:0019867|GO:0031090|GO:0043227|GO:0048856|GO:0033036|GO:0043234|GO:0005640|GO:0051641|GO:0050793|GO:0016043|GO:0031224|GO:0044877|GO:0005515|GO:0005622|GO:0042175|GO:0012505|GO:0009653|GO:0043229|GO:0050794|GO:0045184|GO:0005635|GO:0034993|GO:0032403|GO:0051128|GO:0016021|GO:0006996|GO:0005783|GO:0008104|GO:0031965|GO:0045185|GO:…	cell|macromolecular complex|membrane|developmental process|cellular process|localization|outer membrane|organelle membrane|membrane-bounded organelle|anatomical structure development|macromolecule localization|protein complex|nuclear outer membrane|cellular localization|regulation of developmental process|cellular component organization|intrinsic component of membrane|macromolecular complex bindi…	-	-	-	-	14:95407266-95475836	DOWN
ENSG00000139433	GLTP	glycolipid transfer protein [Source:HGNC Symbol;Acc:HGNC:24867]	protein_coding	GO:0005576|GO:0008152|GO:0005623|GO:0016020|GO:0009987|GO:0051179|GO:0005215|GO:0097367|GO:0071704|GO:0044237|GO:0043227|GO:0033036|GO:0005515|GO:0005622|GO:0008289|GO:0005615|GO:0006807|GO:0051861|GO:0017089|GO:0031982|GO:0006810|GO:1901135|GO:0044255|GO:0005319|GO:0042802|GO:0006629|GO:0005737|GO:0010876|GO:0070062|GO:1903561|GO:1901264|GO:0071702|GO:0006869|GO:0005829|GO:0120013|GO:0006665|GO:…	extracellular region|metabolic process|cell|membrane|cellular process|localization|transporter activity|carbohydrate derivative binding|organic substance metabolic process|cellular metabolic process|membrane-bounded organelle|macromolecule localization|protein binding|intracellular|lipid binding|extracellular space|nitrogen compound metabolic process|glycolipid binding|glycolipid transporter acti…	-	-	-	-	12:109850943-109880488	DOWN
ENSG00000165868	HSPA12A	heat shock protein family A (Hsp70) member 12A [Source:HGNC Symbol;Acc:HGNC:19022]	protein_coding	GO:0005576|GO:0097367|GO:0043227|GO:0043167|GO:0097159|GO:0005615|GO:0036094|GO:0031982|GO:0000166|GO:0070062|GO:1903561|GO:0032555|GO:0035639|GO:0017076|GO:0030554|GO:0032559|GO:0005524	extracellular region|carbohydrate derivative binding|membrane-bounded organelle|ion binding|organic cyclic compound binding|extracellular space|small molecule binding|vesicle|nucleotide binding|extracellular exosome|extracellular vesicle|purine ribonucleotide binding|purine ribonucleoside triphosphate binding|purine nucleotide binding|adenyl nucleotide binding|adenyl ribonucleotide binding|ATP bi…	-	-	-	-	10:116671192-116849741	DOWN
ENSG00000151967	SCHIP1	schwannomin interacting protein 1 [Source:HGNC Symbol;Acc:HGNC:15678]	protein_coding	-	-	-	-	-	-	3:159839861-159897360	DOWN
ENSG00000228638	FCF1P2	FCF1 pseudogene 2 [Source:HGNC Symbol;Acc:HGNC:44614]	transcribed_processed_pseudogene	-	-	-	-	-	-	3:48290793-48291375	DOWN
ENSG00000232759	AC002480.1	uncharacterized LOC100506178 [Source:NCBI gene;Acc:100506178]	antisense	-	-	-	-	-	-	7:22563337-22573996	DOWN
ENSG00000250303	AP002884.1	uncharacterized LOC283140 [Source:NCBI gene;Acc:283140]	lincRNA	-	-	-	-	-	-	11:112270749-112362534	DOWN
ENSG00000137673	MMP7	matrix metallopeptidase 7 [Source:HGNC Symbol;Acc:HGNC:7174]	protein_coding	GO:0005576|GO:0008152|GO:0000003|GO:0005623|GO:0022414|GO:0032502|GO:0003824|GO:0009987|GO:0048511|GO:0050896|GO:0097367|GO:0042698|GO:0071704|GO:0043227|GO:0043167|GO:0009628|GO:0016043|GO:0009986|GO:0005515|GO:0031012|GO:0048609|GO:0016787|GO:0009605|GO:0005615|GO:0006807|GO:0009056|GO:0051716|GO:0009991|GO:0005539|GO:0008233|GO:0008201|GO:0031982|GO:0007565|GO:0017171|GO:0044849|GO:0043062|GO:…	extracellular region|metabolic process|reproduction|cell|reproductive process|developmental process|catalytic activity|cellular process|rhythmic process|response to stimulus|carbohydrate derivative binding|ovulation cycle|organic substance metabolic process|membrane-bounded organelle|ion binding|response to abiotic stimulus|cellular component organization|cell surface|protein binding|extracellula…	K01397	matrix metalloproteinase-7 (matrilysin, uterine)[3.4.24.23]	hsa04310	Wnt signaling pathway - Homo sapiens (human)	11:102520508-102530753	DOWN
ENSG00000261578	AP003119.3	novel transcript, overlapping to TSKU	sense_overlapping	-	-	-	-	-	-	11:76800364-76804555	DOWN
ENSG00000174529	TMEM81	transmembrane protein 81 [Source:HGNC Symbol;Acc:HGNC:32349]	protein_coding	GO:0016020|GO:0031224|GO:0016021	membrane|intrinsic component of membrane|integral component of membrane	-	-	-	-	1:205083129-205084460	DOWN
ENSG00000174343	CHRNA9	cholinergic receptor nicotinic alpha 9 subunit [Source:HGNC Symbol;Acc:HGNC:14079]	protein_coding	GO:0045202|GO:0023052|GO:0005623|GO:0032991|GO:0016020|GO:0032502|GO:0009987|GO:0030054|GO:0051179|GO:0005215|GO:0004871|GO:0050896|GO:1902495|GO:0007165|GO:0097060|GO:0048856|GO:0071944|GO:0009628|GO:0031224|GO:0098794|GO:0005886|GO:0005515|GO:0004872|GO:0022857|GO:0007154|GO:0038023|GO:0051606|GO:0009653|GO:0009605|GO:0043235|GO:0051716|GO:0050794|GO:0006810|GO:0019725|GO:0048513|GO:0031226|GO:…	synapse|signaling|cell|macromolecular complex|membrane|developmental process|cellular process|cell junction|localization|transporter activity|signal transducer activity|response to stimulus|transmembrane transporter complex|signal transduction|synaptic membrane|anatomical structure development|cell periphery|response to abiotic stimulus|intrinsic component of membrane|postsynapse|plasma membrane|…	K04810	nicotinic acetylcholine receptor alpha-9[-]	hsa04080	Neuroactive ligand-receptor interaction - Homo sapiens (human)	4:40335329-40355217	DOWN
ENSG00000171403	KRT9	keratin 9 [Source:HGNC Symbol;Acc:HGNC:6447]	protein_coding	GO:0005576|GO:0005623|GO:0016020|GO:0032502|GO:0009987|GO:0005198|GO:0043227|GO:0048856|GO:0016043|GO:0005622|GO:0005615|GO:0043229|GO:0005200|GO:0031982|GO:0009888|GO:0097435|GO:0045103|GO:0048513|GO:0008219|GO:0006996|GO:0031424|GO:0005737|GO:0099512|GO:0043231|GO:0048731|GO:0007275|GO:0070062|GO:1903561|GO:0012501|GO:0070268|GO:0005634|GO:0060429|GO:0043588|GO:0045109|GO:0005856|GO:0008544|GO:…	extracellular region|cell|membrane|developmental process|cellular process|structural molecule activity|membrane-bounded organelle|anatomical structure development|cellular component organization|intracellular|extracellular space|intracellular organelle|structural constituent of cytoskeleton|vesicle|tissue development|supramolecular fiber organization|intermediate filament-based process|animal org…	-	-	-	-	17:41565841-41572058	DOWN
ENSG00000204362	AL590644.1	novel transcript	lincRNA	-	-	-	-	-	-	1:17189783-17197617	DOWN
ENSG00000230149	AL021707.3	novel transcript, antisense to SUN2	antisense	-	-	-	-	-	-	22:38734730-38738990	DOWN
ENSG00000078098	FAP	fibroblast activation protein alpha [Source:HGNC Symbol;Acc:HGNC:3590]	protein_coding	GO:0040011|GO:0005576|GO:0008152|GO:0005623|GO:0016020|GO:0032502|GO:0003824|GO:0009987|GO:0030054|GO:0051179|GO:0050896|GO:0071704|GO:0044237|GO:0030055|GO:0048870|GO:0048856|GO:0071944|GO:0008283|GO:0016043|GO:0031224|GO:0007155|GO:0009986|GO:0019222|GO:0005886|GO:0044877|GO:0042995|GO:0005515|GO:0045178|GO:0006950|GO:0005622|GO:0016787|GO:0009653|GO:0009605|GO:0005615|GO:0006807|GO:0009056|GO:…	locomotion|extracellular region|metabolic process|cell|membrane|developmental process|catalytic activity|cellular process|cell junction|localization|response to stimulus|organic substance metabolic process|cellular metabolic process|cell-substrate junction|cell motility|anatomical structure development|cell periphery|cell proliferation|cellular component organization|intrinsic component of membra…	-	-	-	-	2:162170684-162245151	DOWN
ENSG00000154429	CCSAP	centriole, cilia and spindle associated protein [Source:HGNC Symbol;Acc:HGNC:29578]	protein_coding	GO:0040011|GO:0005623|GO:0032502|GO:0009987|GO:0051179|GO:0007017|GO:0048870|GO:0005818|GO:0048856|GO:0050793|GO:0016043|GO:0040012|GO:0042995|GO:0005515|GO:0005622|GO:0005929|GO:0043229|GO:0050794|GO:0007018|GO:0097435|GO:0022607|GO:0007049|GO:0097014|GO:0051128|GO:0051726|GO:0005930|GO:0000235|GO:0048468|GO:0006996|GO:0035869|GO:0060296|GO:2000145|GO:0051270|GO:1902115|GO:0043005|GO:0007051|GO:…	locomotion|cell|developmental process|cellular process|localization|microtubule-based process|cell motility|aster|anatomical structure development|regulation of developmental process|cellular component organization|regulation of locomotion|cell projection|protein binding|intracellular|cilium|intracellular organelle|regulation of cellular process|microtubule-based movement|supramolecular fiber org…	-	-	-	-	1:229321005-229343294	DOWN
ENSG00000108960	MMD	monocyte to macrophage differentiation associated [Source:HGNC Symbol;Acc:HGNC:7153]	protein_coding	GO:0008152|GO:0005623|GO:0016020|GO:0032502|GO:0003824|GO:0009987|GO:0051179|GO:0071704|GO:0044237|GO:0031090|GO:0043227|GO:0048856|GO:0033036|GO:0071944|GO:0050793|GO:0031224|GO:0016740|GO:0019222|GO:0005886|GO:0004872|GO:0009893|GO:0005622|GO:0012505|GO:0065009|GO:0043229|GO:0006807|GO:0019835|GO:0050794|GO:0031982|GO:0045597|GO:0005768|GO:0031323|GO:0031226|GO:0016021|GO:0005794|GO:0048468|GO:…	metabolic process|cell|membrane|developmental process|catalytic activity|cellular process|localization|organic substance metabolic process|cellular metabolic process|organelle membrane|membrane-bounded organelle|anatomical structure development|macromolecule localization|cell periphery|regulation of developmental process|intrinsic component of membrane|transferase activity|regulation of metabolic…	-	-	-	-	17:55392613-55421992	DOWN
ENSG00000232931	LINC00342	long intergenic non-protein coding RNA 342 [Source:HGNC Symbol;Acc:HGNC:42470]	lincRNA	-	-	-	-	-	-	2:95807118-95816215	DOWN
ENSG00000136859	ANGPTL2	angiopoietin like 2 [Source:HGNC Symbol;Acc:HGNC:490]	protein_coding	GO:0005576|GO:0032502|GO:0043227|GO:0048856|GO:0005515|GO:0005615|GO:0031982|GO:0005102|GO:0007275|GO:0070062|GO:1903561	extracellular region|developmental process|membrane-bounded organelle|anatomical structure development|protein binding|extracellular space|vesicle|receptor binding|multicellular organism development|extracellular exosome|extracellular vesicle	-	-	-	-	9:127087332-127122883	DOWN
ENSG00000148677	ANKRD1	ankyrin repeat domain 1 [Source:HGNC Symbol;Acc:HGNC:15819]	protein_coding	GO:0023052|GO:0008152|GO:0005623|GO:0032991|GO:0000988|GO:0032502|GO:0009987|GO:0051179|GO:0050896|GO:0071704|GO:0044237|GO:0051707|GO:0000989|GO:0007165|GO:0043227|GO:0048856|GO:0033036|GO:0043234|GO:0050793|GO:0097159|GO:0009628|GO:0016043|GO:0009892|GO:0019222|GO:0005515|GO:0007154|GO:0009893|GO:0006950|GO:0005622|GO:1904951|GO:0023051|GO:0009653|GO:0009605|GO:0009607|GO:0009058|GO:0043229|GO:…	signaling|metabolic process|cell|macromolecular complex|transcription factor activity, protein binding|developmental process|cellular process|localization|response to stimulus|organic substance metabolic process|cellular metabolic process|response to other organism|transcription factor activity, transcription factor binding|signal transduction|membrane-bounded organelle|anatomical structure devel…	-	-	-	-	10:90912096-90921276	DOWN
ENSG00000157064	NMNAT2	nicotinamide nucleotide adenylyltransferase 2 [Source:HGNC Symbol;Acc:HGNC:16789]	protein_coding	GO:0045202|GO:0008152|GO:0005623|GO:0016020|GO:0003824|GO:0009987|GO:0097367|GO:0071704|GO:0044237|GO:0031090|GO:0043227|GO:0043167|GO:0097159|GO:0016740|GO:0005622|GO:0012505|GO:0009058|GO:0043229|GO:0006807|GO:0036094|GO:0034641|GO:0031982|GO:0005768|GO:0006139|GO:0019637|GO:0006520|GO:0044281|GO:0044249|GO:0005794|GO:0006725|GO:0097708|GO:0006082|GO:0051186|GO:0046483|GO:0016772|GO:0005737|GO:…	synapse|metabolic process|cell|membrane|catalytic activity|cellular process|carbohydrate derivative binding|organic substance metabolic process|cellular metabolic process|organelle membrane|membrane-bounded organelle|ion binding|organic cyclic compound binding|transferase activity|intracellular|endomembrane system|biosynthetic process|intracellular organelle|nitrogen compound metabolic process|sm…	K06210	nicotinamide mononucleotide adenylyltransferase[2.7.7.18]	hsa01100|hsa00760	Metabolic pathways - Homo sapiens (human)|Nicotinate and nicotinamide metabolism - Homo sapiens (human)	1:183248237-183418602	DOWN
ENSG00000232774	FLJ22447	uncharacterized LOC400221 [Source:NCBI gene;Acc:400221]	lincRNA	-	-	-	-	-	-	14:61570540-61658696	DOWN
ENSG00000243978	RTL9	retrotransposon Gag like 9 [Source:HGNC Symbol;Acc:HGNC:29245]	protein_coding	-	-	-	-	-	-	X:110358816-110456334	DOWN
ENSG00000199744	SNORD36A	small nucleolar RNA, C/D box 36A [Source:HGNC Symbol;Acc:HGNC:10163]	snoRNA	-	-	-	-	-	-	9:133350456-133350528	DOWN
ENSG00000244332	AL138759.1	novel transcript	sense_overlapping	-	-	-	-	-	-	10:94577439-94611238	DOWN
ENSG00000139160	ETFBKMT	electron transfer flavoprotein subunit beta lysine methyltransferase [Source:HGNC Symbol;Acc:HGNC:28739]	protein_coding	GO:0008152|GO:0005623|GO:0032991|GO:0003824|GO:0009987|GO:0032259|GO:0071704|GO:0044237|GO:0043227|GO:0043234|GO:0009892|GO:0016740|GO:0019222|GO:0005515|GO:0005622|GO:0065009|GO:0043229|GO:0006807|GO:0009056|GO:0048523|GO:0050794|GO:0031324|GO:0042180|GO:0031323|GO:0044281|GO:0055114|GO:0044255|GO:0045833|GO:0006082|GO:0006629|GO:0005737|GO:0031072|GO:0043231|GO:0044092|GO:0019538|GO:0045922|GO:…	metabolic process|cell|macromolecular complex|catalytic activity|cellular process|methylation|organic substance metabolic process|cellular metabolic process|membrane-bounded organelle|protein complex|negative regulation of metabolic process|transferase activity|regulation of metabolic process|protein binding|intracellular|regulation of molecular function|intracellular organelle|nitrogen compound …	-	-	-	-	12:31647160-31673114	DOWN
ENSG00000136630	HLX	H2.0 like homeobox [Source:HGNC Symbol;Acc:HGNC:4978]	protein_coding	GO:0040007|GO:0008152|GO:0005623|GO:0002376|GO:0032502|GO:0009987|GO:0050896|GO:0071704|GO:0044237|GO:0002683|GO:0002684|GO:0006955|GO:0043227|GO:0048856|GO:0050793|GO:0097159|GO:0002682|GO:0008283|GO:0002520|GO:0007155|GO:0019222|GO:0048589|GO:0005515|GO:0030155|GO:0005622|GO:0045785|GO:0045927|GO:0045321|GO:0009653|GO:0009058|GO:0043229|GO:0006807|GO:0040008|GO:0048523|GO:0050794|GO:0002366|GO:…	growth|metabolic process|cell|immune system process|developmental process|cellular process|response to stimulus|organic substance metabolic process|cellular metabolic process|negative regulation of immune system process|positive regulation of immune system process|immune response|membrane-bounded organelle|anatomical structure development|regulation of developmental process|organic cyclic compoun…	-	-	-	-	1:220879400-220885059	DOWN
ENSG00000213240	AC239799.1	novel transcript	protein_coding	GO:0043167|GO:0043169|GO:0046872|GO:0005509	ion binding|cation binding|metal ion binding|calcium ion binding	-	-	-	-	1:146113652-146229000	DOWN
ENSG00000139289	PHLDA1	pleckstrin homology like domain family A member 1 [Source:HGNC Symbol;Acc:HGNC:8933]	protein_coding	GO:0008152|GO:0005623|GO:0009987|GO:0071704|GO:0044237|GO:0043227|GO:0005515|GO:0005622|GO:0009058|GO:0043229|GO:0006807|GO:0031982|GO:0007049|GO:0044249|GO:1901135|GO:0008219|GO:0097708|GO:0044770|GO:0005737|GO:0043231|GO:0019538|GO:0012501|GO:0005634|GO:0031981|GO:0044772|GO:1901137|GO:0000278|GO:0005730|GO:0005829|GO:0034645|GO:0044839|GO:0009100|GO:0031410|GO:0000086|GO:0009101|GO:0006915|GO:…	metabolic process|cell|cellular process|organic substance metabolic process|cellular metabolic process|membrane-bounded organelle|protein binding|intracellular|biosynthetic process|intracellular organelle|nitrogen compound metabolic process|vesicle|cell cycle|cellular biosynthetic process|carbohydrate derivative metabolic process|cell death|intracellular vesicle|cell cycle phase transition|cytopl…	-	-	-	-	12:76025447-76033932	DOWN
ENSG00000258924	AC002094.1	novel transcript readthrough between TMEM199 and SARM1	processed_transcript	-	-	-	-	-	-	17:28357647-28381697	DOWN
ENSG00000273432	AC004951.4	novel transcript, POLR2J4 pseudogene-RASA4 pseudogene readthrough	processed_transcript	-	-	-	-	-	-	7:43951910-44019151	DOWN
ENSG00000187800	PEAR1	platelet endothelial aggregation receptor 1 [Source:HGNC Symbol;Acc:HGNC:33631]	protein_coding	GO:0023052|GO:0005623|GO:0016020|GO:0009987|GO:0051179|GO:0050896|GO:0007165|GO:0023057|GO:0071944|GO:0031224|GO:0005886|GO:0007154|GO:0023051|GO:0051716|GO:0048523|GO:0050794|GO:0006810|GO:0008037|GO:0009968|GO:0016021|GO:0010646|GO:0009966|GO:0007166|GO:0001891|GO:0008593|GO:0006909|GO:0007219|GO:0006910|GO:0045746|GO:0016192|GO:0006897|GO:0043654|GO:0043277	signaling|cell|membrane|cellular process|localization|response to stimulus|signal transduction|negative regulation of signaling|cell periphery|intrinsic component of membrane|plasma membrane|cell communication|regulation of signaling|cellular response to stimulus|negative regulation of cellular process|regulation of cellular process|transport|cell recognition|negative regulation of signal transdu…	-	-	-	-	1:156893698-156916434	DOWN
ENSG00000074966	TXK	TXK tyrosine kinase [Source:HGNC Symbol;Acc:HGNC:12434]	protein_coding	GO:0040007|GO:0023052|GO:0008152|GO:0005623|GO:0016020|GO:0002376|GO:0032502|GO:0003824|GO:0009987|GO:0050896|GO:0097367|GO:0071704|GO:0044237|GO:0002684|GO:0007165|GO:0006955|GO:0043227|GO:0043167|GO:0048856|GO:0071944|GO:0097159|GO:0002682|GO:0008283|GO:0016740|GO:0019222|GO:0005886|GO:0048589|GO:0005515|GO:0019898|GO:0007154|GO:0009893|GO:0006950|GO:0005622|GO:0065009|GO:0023051|GO:0002253|GO:…	growth|signaling|metabolic process|cell|membrane|immune system process|developmental process|catalytic activity|cellular process|response to stimulus|carbohydrate derivative binding|organic substance metabolic process|cellular metabolic process|positive regulation of immune system process|signal transduction|immune response|membrane-bounded organelle|ion binding|anatomical structure development|c…	K08016	tyrosine-protein kinase TXK[2.7.10.2]	hsa04670	Leukocyte transendothelial migration - Homo sapiens (human)	4:48066393-48134256	DOWN
ENSG00000224818	AC096677.2	novel transcript	3prime_overlapping_ncRNA	-	-	-	-	-	-	1:201464383-201465146	DOWN
ENSG00000128394	APOBEC3F	apolipoprotein B mRNA editing enzyme catalytic subunit 3F [Source:HGNC Symbol;Acc:HGNC:17356]	protein_coding	GO:0008152|GO:0005623|GO:0032991|GO:0002376|GO:0003824|GO:0009987|GO:0050896|GO:0071704|GO:0044237|GO:0051707|GO:0006955|GO:1990904|GO:0043227|GO:0043167|GO:0043234|GO:0097159|GO:0002682|GO:0005515|GO:0006950|GO:0005622|GO:0016787|GO:0009605|GO:0009607|GO:0043229|GO:0006807|GO:0009056|GO:0048523|GO:0050794|GO:0019239|GO:0034641|GO:0032196|GO:0048525|GO:0006139|GO:0016810|GO:0043207|GO:0044281|GO:…	metabolic process|cell|macromolecular complex|immune system process|catalytic activity|cellular process|response to stimulus|organic substance metabolic process|cellular metabolic process|response to other organism|immune response|ribonucleoprotein complex|membrane-bounded organelle|ion binding|protein complex|organic cyclic compound binding|regulation of immune system process|protein binding|res…	-	-	-	-	22:39040604-39053910	DOWN
ENSG00000234290	AC116366.1	novel transcript	antisense	-	-	-	-	-	-	5:132468890-132473043	DOWN
ENSG00000163131	CTSS	cathepsin S [Source:HGNC Symbol;Acc:HGNC:2545]	protein_coding	GO:0005576|GO:0023052|GO:0008152|GO:0005623|GO:0002376|GO:0003824|GO:0009987|GO:0051179|GO:0050896|GO:0097367|GO:0071704|GO:0044237|GO:0002684|GO:0007165|GO:0006955|GO:0043227|GO:0009628|GO:0002682|GO:0016043|GO:0044877|GO:0005515|GO:0007154|GO:0006950|GO:0005622|GO:0012505|GO:0065009|GO:0016787|GO:0050840|GO:0045321|GO:0002253|GO:0005615|GO:0043229|GO:0006807|GO:0009056|GO:0051716|GO:0019882|GO:…	extracellular region|signaling|metabolic process|cell|immune system process|catalytic activity|cellular process|localization|response to stimulus|carbohydrate derivative binding|organic substance metabolic process|cellular metabolic process|positive regulation of immune system process|signal transduction|immune response|membrane-bounded organelle|response to abiotic stimulus|regulation of immune …	K01368	cathepsin S[3.4.22.27]	hsa05152|hsa04145|hsa04210|hsa04142|hsa04612	Tuberculosis - Homo sapiens (human)|Phagosome - Homo sapiens (human)|Apoptosis - Homo sapiens (human)|Lysosome - Homo sapiens (human)|Antigen processing and presentation - Homo sapiens (human)	1:150730196-150765957	DOWN
ENSG00000080573	COL5A3	collagen type V alpha 3 chain [Source:HGNC Symbol;Acc:HGNC:14864]	protein_coding	GO:0005576|GO:0008152|GO:0005623|GO:0032991|GO:0032502|GO:0009987|GO:0005198|GO:0097367|GO:0071704|GO:0043227|GO:0043167|GO:0048856|GO:0043234|GO:0016043|GO:0007155|GO:0044877|GO:0005515|GO:0031012|GO:0005622|GO:0012505|GO:0005615|GO:0043229|GO:0009056|GO:0005201|GO:0005539|GO:0008201|GO:0031982|GO:0097435|GO:0032403|GO:0048513|GO:0031589|GO:0043062|GO:0005578|GO:0005783|GO:0044236|GO:0005583|GO:…	extracellular region|metabolic process|cell|macromolecular complex|developmental process|cellular process|structural molecule activity|carbohydrate derivative binding|organic substance metabolic process|membrane-bounded organelle|ion binding|anatomical structure development|protein complex|cellular component organization|cell adhesion|macromolecular complex binding|protein binding|extracellular m…	K19721	collagen, type V/XI/XXIV/XXVII, alpha[-]	hsa04974	Protein digestion and absorption - Homo sapiens (human)	19:9959561-10010471	DOWN
ENSG00000280339	AP001528.3	novel transcript	TEC	-	-	-	-	-	-	11:86908990-86912238	DOWN
ENSG00000284052	AC006460.2	novel transcript	bidirectional_promoter_lncRNA	-	-	-	-	-	-	2:190607660-190649840	DOWN
ENSG00000176597	B3GNT5	UDP-GlcNAc:betaGal beta-1,3-N-acetylglucosaminyltransferase 5 [Source:HGNC Symbol;Acc:HGNC:15684]	protein_coding	GO:0008152|GO:0005623|GO:0016020|GO:0032502|GO:0003824|GO:0009987|GO:0071704|GO:0044237|GO:0031090|GO:0043227|GO:0048856|GO:0031224|GO:0016740|GO:0005622|GO:0012505|GO:0009058|GO:0043229|GO:0006807|GO:0007420|GO:0048513|GO:0070085|GO:0044249|GO:1901135|GO:0060322|GO:0016021|GO:0005794|GO:0044255|GO:0016757|GO:0006629|GO:0005737|GO:0006486|GO:0043231|GO:0048731|GO:0007275|GO:0019538|GO:0044267|GO:…	metabolic process|cell|membrane|developmental process|catalytic activity|cellular process|organic substance metabolic process|cellular metabolic process|organelle membrane|membrane-bounded organelle|anatomical structure development|intrinsic component of membrane|transferase activity|intracellular|endomembrane system|biosynthetic process|intracellular organelle|nitrogen compound metabolic process…	K03766	beta-1,3-N-acetylglucosaminyltransferase 5[2.4.1.206]	hsa01100|hsa00601	Metabolic pathways - Homo sapiens (human)|Glycosphingolipid biosynthesis - lacto and neolacto series - Homo sapiens (human)	3:183253244-183298504	DOWN
ENSG00000198959	TGM2	transglutaminase 2 [Source:HGNC Symbol;Acc:HGNC:11778]	protein_coding	GO:0005576|GO:0023052|GO:0008152|GO:0005623|GO:0016020|GO:0032502|GO:0003824|GO:0009987|GO:0030054|GO:0051179|GO:0050896|GO:0097367|GO:0071704|GO:0044237|GO:0030055|GO:0007165|GO:0043227|GO:0043167|GO:0048856|GO:0071944|GO:0097159|GO:0008283|GO:0016043|GO:0031224|GO:0007155|GO:0016740|GO:0005886|GO:0005515|GO:0007154|GO:0006950|GO:0031012|GO:0030155|GO:0005622|GO:0045785|GO:0012505|GO:0023051|GO:…	extracellular region|signaling|metabolic process|cell|membrane|developmental process|catalytic activity|cellular process|cell junction|localization|response to stimulus|carbohydrate derivative binding|organic substance metabolic process|cellular metabolic process|cell-substrate junction|signal transduction|membrane-bounded organelle|ion binding|anatomical structure development|cell periphery|orga…	K05625	transglutaminase 2[2.3.2.13]	hsa05016	Huntington's disease - Homo sapiens (human)	20:38127387-38166578	DOWN
ENSG00000277067	CU634019.1	uncharacterized LOC102724843 [Source:NCBI gene;Acc:102724843]	lincRNA	-	-	-	-	-	-	21:7048891-7087229	DOWN
ENSG00000171428	NAT1	N-acetyltransferase 1 [Source:HGNC Symbol;Acc:HGNC:7645]	protein_coding	GO:0008152|GO:0005623|GO:0003824|GO:0009987|GO:0050896|GO:0044237|GO:0016740|GO:0005622|GO:0051716|GO:0009410|GO:0006805|GO:0016746|GO:0005737|GO:0016747|GO:0005829|GO:0071466|GO:0016410|GO:0016407|GO:0008080|GO:0004060	metabolic process|cell|catalytic activity|cellular process|response to stimulus|cellular metabolic process|transferase activity|intracellular|cellular response to stimulus|response to xenobiotic stimulus|xenobiotic metabolic process|transferase activity, transferring acyl groups|cytoplasm|transferase activity, transferring acyl groups other than amino-acyl groups|cytosol|cellular response to xeno…	K00622	arylamine N-acetyltransferase[2.3.1.5]	hsa01100|hsa05204|hsa00983|hsa00232	Metabolic pathways - Homo sapiens (human)|Chemical carcinogenesis - Homo sapiens (human)|Drug metabolism - other enzymes - Homo sapiens (human)|Caffeine metabolism - Homo sapiens (human)	8:18170477-18223689	DOWN
ENSG00000272703	AP005137.2	novel transcript	antisense	-	-	-	-	-	-	18:11857155-11857554	DOWN
ENSG00000144642	RBMS3	RNA binding motif single stranded interacting protein 3 [Source:HGNC Symbol;Acc:HGNC:13427]	protein_coding	GO:0023052|GO:0008152|GO:0005623|GO:0009987|GO:0050896|GO:0071704|GO:0044237|GO:0007165|GO:0023057|GO:0097159|GO:0009892|GO:0019222|GO:0007154|GO:0009893|GO:0006950|GO:0005622|GO:0023051|GO:0009607|GO:0009058|GO:0006807|GO:0051716|GO:0048523|GO:0050794|GO:0034641|GO:0031323|GO:0044249|GO:0009968|GO:0006952|GO:0010646|GO:0007267|GO:0009966|GO:0003676|GO:0007166|GO:0005737|GO:0019538|GO:0051171|GO:…	signaling|metabolic process|cell|cellular process|response to stimulus|organic substance metabolic process|cellular metabolic process|signal transduction|negative regulation of signaling|organic cyclic compound binding|negative regulation of metabolic process|regulation of metabolic process|cell communication|positive regulation of metabolic process|response to stress|intracellular|regulation of …	-	-	-	-	3:28574791-30010391	DOWN
ENSG00000244122	UGT1A7	UDP glucuronosyltransferase family 1 member A7 [Source:HGNC Symbol;Acc:HGNC:12539]	protein_coding	GO:0008152|GO:0005623|GO:0098772|GO:0016020|GO:0003824|GO:0009987|GO:0050896|GO:0030234|GO:0071704|GO:0044237|GO:0042445|GO:0043227|GO:0043167|GO:0031224|GO:0016740|GO:0005515|GO:0005789|GO:0005622|GO:0042175|GO:0012505|GO:0065009|GO:0008289|GO:0043229|GO:0051716|GO:0036094|GO:0019840|GO:0005975|GO:0043177|GO:0007588|GO:0044281|GO:0010817|GO:0016021|GO:0006725|GO:0044255|GO:0004857|GO:0005783|GO:…	metabolic process|cell|molecular function regulator|membrane|catalytic activity|cellular process|response to stimulus|enzyme regulator activity|organic substance metabolic process|cellular metabolic process|hormone metabolic process|membrane-bounded organelle|ion binding|intrinsic component of membrane|transferase activity|protein binding|endoplasmic reticulum membrane|intracellular|nuclear outer…	K00699	glucuronosyltransferase[2.4.1.17]	hsa01100|hsa05204|hsa00980|hsa00982|hsa00830|hsa00140|hsa00983|hsa00860|hsa00040|hsa00053	Metabolic pathways - Homo sapiens (human)|Chemical carcinogenesis - Homo sapiens (human)|Metabolism of xenobiotics by cytochrome P450 - Homo sapiens (human)|Drug metabolism - cytochrome P450 - Homo sapiens (human)|Retinol metabolism - Homo sapiens (human)|Steroid hormone biosynthesis - Homo sapiens (human)|Drug metabolism - other enzymes - Homo sapiens (human)|Porphyrin and chlorophyll metabolism…	2:233681938-233773299	DOWN
ENSG00000267102	AC060766.1	RAB32, member RAS oncogene family (RAB32) pseudogene	transcribed_processed_pseudogene	-	-	-	-	-	-	17:35409602-35410228	DOWN
ENSG00000006606	CCL26	C-C motif chemokine ligand 26 [Source:HGNC Symbol;Acc:HGNC:10625]	protein_coding	GO:0040011|GO:0005576|GO:0023052|GO:0008152|GO:0098772|GO:0002376|GO:0009987|GO:0051179|GO:0004871|GO:0050896|GO:0071704|GO:0044237|GO:0040017|GO:0007165|GO:0006955|GO:0048870|GO:0050900|GO:0008283|GO:0016043|GO:0040012|GO:0019222|GO:0048018|GO:0005515|GO:0007154|GO:0009893|GO:0006950|GO:0065009|GO:0023051|GO:0009605|GO:0005615|GO:0006807|GO:0044089|GO:0051716|GO:0050794|GO:2000147|GO:0035556|GO:…	locomotion|extracellular region|signaling|metabolic process|molecular function regulator|immune system process|cellular process|localization|signal transducer activity|response to stimulus|organic substance metabolic process|cellular metabolic process|positive regulation of locomotion|signal transduction|immune response|cell motility|leukocyte migration|cell proliferation|cellular component organ…	K05514	C-C motif chemokine, other[-]	hsa04060|hsa04062	Cytokine-cytokine receptor interaction - Homo sapiens (human)|Chemokine signaling pathway - Homo sapiens (human)	7:75769533-75789896	DOWN
ENSG00000259712	AC023906.5	novel transcript, antisense to MAPK6	antisense	-	-	-	-	-	-	15:52056675-52100523	DOWN

## Sheet: angiogenesis-related_down
gene id	gene name	description	gene_type	GO_id	GO_term	KO_ID	KO_Description	kegg_id	kegg_term	locus	updown
ENSG00000163235	TGFA	transforming growth factor alpha [Source:HGNC Symbol;Acc:HGNC:11765]	protein_coding	GO:0005576|GO:0023052|GO:0008152|GO:0005623|GO:0016020|GO:0032502|GO:0009987|GO:0051179|GO:0050896|GO:0071704|GO:0044237|GO:0031090|GO:0007165|GO:0043227|GO:0048856|GO:0051641|GO:0071944|GO:0008283|GO:0016043|GO:0031224|GO:0009986|GO:0019222|GO:0005886|GO:0005515|GO:0005789|GO:0007154|GO:0009893|GO:0006950|GO:0005622|GO:0042175|GO:0012505|GO:0065009|GO:0023051|GO:0009653|GO:0005615|GO:0009058|GO:…	extracellular region|signaling|metabolic process|cell|membrane|developmental process|cellular process|localization|response to stimulus|organic substance metabolic process|cellular metabolic process|organelle membrane|signal transduction|membrane-bounded organelle|anatomical structure development|cellular localization|cell periphery|cell proliferation|cellular component organization|intrinsic com…	K08774	transforming growth factor, alpha[-]	hsa05200|hsa04151|hsa04010|hsa04014|hsa05225|hsa05215|hsa04012|hsa01521|hsa05212|hsa05214|hsa05211|hsa05223	Pathways in cancer - Homo sapiens (human)|PI3K-Akt signaling pathway - Homo sapiens (human)|MAPK signaling pathway - Homo sapiens (human)|Ras signaling pathway - Homo sapiens (human)|Hepatocellular carcinoma - Homo sapiens (human)|Prostate cancer - Homo sapiens (human)|ErbB signaling pathway - Homo sapiens (human)|EGFR tyrosine kinase inhibitor resistance - Homo sapiens (human)|Pancreatic cancer …	2:70447280-70554193	DOWN
ENSG00000163659	TIPARP	TCDD inducible poly(ADP-ribose) polymerase [Source:HGNC Symbol;Acc:HGNC:23696]	protein_coding	GO:0023052|GO:0008152|GO:0000003|GO:0005623|GO:0022414|GO:0002376|GO:0032502|GO:0003824|GO:0009987|GO:0050896|GO:0071704|GO:0044237|GO:0042445|GO:0007165|GO:0043227|GO:0043167|GO:0003006|GO:0048856|GO:0097159|GO:0002520|GO:0009892|GO:0016740|GO:0019222|GO:0007154|GO:0009893|GO:0005622|GO:0009653|GO:0009058|GO:0043229|GO:0006807|GO:0009056|GO:0051716|GO:0050794|GO:0008406|GO:0009888|GO:0060325|GO:…	signaling|metabolic process|reproduction|cell|reproductive process|immune system process|developmental process|catalytic activity|cellular process|response to stimulus|organic substance metabolic process|cellular metabolic process|hormone metabolic process|signal transduction|membrane-bounded organelle|ion binding|developmental process involved in reproduction|anatomical structure development|org…	-	-	-	-	3:156673235-156706770	DOWN
ENSG00000136859	ANGPTL2	angiopoietin like 2 [Source:HGNC Symbol;Acc:HGNC:490]	protein_coding	GO:0005576|GO:0032502|GO:0043227|GO:0048856|GO:0005515|GO:0005615|GO:0031982|GO:0005102|GO:0007275|GO:0070062|GO:1903561	extracellular region|developmental process|membrane-bounded organelle|anatomical structure development|protein binding|extracellular space|vesicle|receptor binding|multicellular organism development|extracellular exosome|extracellular vesicle	-	-	-	-	9:127087332-127122883	DOWN
ENSG00000271503	CCL5	C-C motif chemokine ligand 5 [Source:HGNC Symbol;Acc:HGNC:10632]	protein_coding	GO:0040011|GO:0005576|GO:0023052|GO:0042056|GO:0008152|GO:0005623|GO:0098772|GO:0002376|GO:0003824|GO:0009987|GO:0051179|GO:0050896|GO:0030234|GO:0071704|GO:0044237|GO:0040017|GO:0051707|GO:0002684|GO:0007165|GO:0006955|GO:0048870|GO:0033036|GO:0023057|GO:0035821|GO:0050900|GO:0002682|GO:0008283|GO:0016043|GO:0007155|GO:0040012|GO:0016740|GO:0019222|GO:0005515|GO:0007154|GO:0009893|GO:0006950|GO:…	locomotion|extracellular region|signaling|chemoattractant activity|metabolic process|cell|molecular function regulator|immune system process|catalytic activity|cellular process|localization|response to stimulus|enzyme regulator activity|organic substance metabolic process|cellular metabolic process|positive regulation of locomotion|response to other organism|positive regulation of immune system p…	K12499	C-C motif chemokine 5[-]	hsa04060|hsa05168|hsa04062|hsa05164|hsa04621|hsa04668|hsa04620|hsa05142|hsa05323|hsa05120|hsa04623|hsa05020	Cytokine-cytokine receptor interaction - Homo sapiens (human)|Herpes simplex infection - Homo sapiens (human)|Chemokine signaling pathway - Homo sapiens (human)|Influenza A - Homo sapiens (human)|NOD-like receptor signaling pathway - Homo sapiens (human)|TNF signaling pathway - Homo sapiens (human)|Toll-like receptor signaling pathway - Homo sapiens (human)|Chagas disease (American trypanosomiasi…	17:35871491-35880793	DOWN
ENSG00000106546	AHR	aryl hydrocarbon receptor [Source:HGNC Symbol;Acc:HGNC:348]	protein_coding	GO:0023052|GO:0008152|GO:0005623|GO:0032991|GO:0002376|GO:0032502|GO:0009987|GO:0004871|GO:0048511|GO:0050896|GO:0007623|GO:0071704|GO:0044237|GO:0007165|GO:0043227|GO:0048856|GO:0043234|GO:0097159|GO:0002682|GO:0008283|GO:0009892|GO:0004879|GO:0019222|GO:0005515|GO:0004872|GO:0007154|GO:0009893|GO:0005622|GO:0038023|GO:0045321|GO:0009058|GO:0043229|GO:0006807|GO:0043235|GO:0051716|GO:0003700|GO:…	signaling|metabolic process|cell|macromolecular complex|immune system process|developmental process|cellular process|signal transducer activity|rhythmic process|response to stimulus|circadian rhythm|organic substance metabolic process|cellular metabolic process|signal transduction|membrane-bounded organelle|anatomical structure development|protein complex|organic cyclic compound binding|regulatio…	K09093	aryl hydrocarbon receptor[-]	hsa04659	Th17 cell differentiation - Homo sapiens (human)	7:17298622-17346152	DOWN
ENSG00000182585	EPGN	epithelial mitogen [Source:HGNC Symbol;Acc:HGNC:17470]	protein_coding	GO:0005576|GO:0023052|GO:0008152|GO:0005623|GO:0016020|GO:0032502|GO:0009987|GO:0050896|GO:0071704|GO:0044237|GO:0007165|GO:0048856|GO:0071944|GO:0008283|GO:0016043|GO:0031224|GO:0019222|GO:0005886|GO:0005515|GO:0007154|GO:0009893|GO:0005622|GO:0065009|GO:0023051|GO:0009653|GO:0005615|GO:0006807|GO:0048646|GO:0051716|GO:0050794|GO:0090068|GO:0035556|GO:0001568|GO:0048514|GO:0050673|GO:0051130|GO:…	extracellular region|signaling|metabolic process|cell|membrane|developmental process|cellular process|response to stimulus|organic substance metabolic process|cellular metabolic process|signal transduction|anatomical structure development|cell periphery|cell proliferation|cellular component organization|intrinsic component of membrane|regulation of metabolic process|plasma membrane|protein bindin…	-	-	-	-	4:74308473-74315307	DOWN
ENSG00000137801	THBS1	thrombospondin 1 [Source:HGNC Symbol;Acc:HGNC:11785]	protein_coding	GO:0040011|GO:0005576|GO:0023052|GO:0008152|GO:0005623|GO:0032991|GO:0016020|GO:0002376|GO:0032502|GO:0009987|GO:0051179|GO:0007610|GO:0050896|GO:0097367|GO:0071704|GO:0044237|GO:0002683|GO:0040017|GO:0002684|GO:0007165|GO:0006955|GO:0048870|GO:0043227|GO:0043167|GO:0048856|GO:0033036|GO:0043234|GO:0023057|GO:0050900|GO:0071944|GO:0050793|GO:0009628|GO:0002682|GO:0008283|GO:0005577|GO:0002520|GO:…	locomotion|extracellular region|signaling|metabolic process|cell|macromolecular complex|membrane|immune system process|developmental process|cellular process|localization|behavior|response to stimulus|carbohydrate derivative binding|organic substance metabolic process|cellular metabolic process|negative regulation of immune system process|positive regulation of locomotion|positive regulation of i…	K16857	thrombospondin 1[-]	hsa04151|hsa05165|hsa05206|hsa04015|hsa05205|hsa04510|hsa04145|hsa04350|hsa04512|hsa04115|hsa05144|hsa05219	PI3K-Akt signaling pathway - Homo sapiens (human)|Human papillomavirus infection - Homo sapiens (human)|MicroRNAs in cancer - Homo sapiens (human)|Rap1 signaling pathway - Homo sapiens (human)|Proteoglycans in cancer - Homo sapiens (human)|Focal adhesion - Homo sapiens (human)|Phagosome - Homo sapiens (human)|TGF-beta signaling pathway - Homo sapiens (human)|ECM-receptor interaction - Homo sapien…	15:39581079-39599466	DOWN
ENSG00000136158	SPRY2	sprouty RTK signaling antagonist 2 [Source:HGNC Symbol;Acc:HGNC:11270]	protein_coding	GO:0040011|GO:0040007|GO:0023052|GO:0008152|GO:0005623|GO:0098772|GO:0016020|GO:0032502|GO:0009987|GO:0051179|GO:0050896|GO:0030234|GO:0071704|GO:0044237|GO:0040017|GO:0007017|GO:0007165|GO:0048870|GO:0043227|GO:0048856|GO:0023057|GO:0051641|GO:0071944|GO:0050793|GO:0008283|GO:0016043|GO:0009892|GO:0034260|GO:0040012|GO:0019222|GO:0005886|GO:0048589|GO:0042995|GO:0005515|GO:0007154|GO:0009893|GO:…	locomotion|growth|signaling|metabolic process|cell|molecular function regulator|membrane|developmental process|cellular process|localization|response to stimulus|enzyme regulator activity|organic substance metabolic process|cellular metabolic process|positive regulation of locomotion|microtubule-based process|signal transduction|cell motility|membrane-bounded organelle|anatomical structure develo…	K17383	protein sprouty homolog 2[-]	hsa05206	MicroRNAs in cancer - Homo sapiens (human)	13:80335976-80340951	DOWN
ENSG00000135048	CEMIP2	cell migration inducing hyaluronidase 2 [Source:HGNC Symbol;Acc:HGNC:11869]	protein_coding	GO:0005576|GO:0008152|GO:0005623|GO:0016020|GO:0032502|GO:0003824|GO:0009987|GO:0071704|GO:0044237|GO:0043227|GO:0043167|GO:0048856|GO:0071944|GO:0050793|GO:0031224|GO:0005886|GO:0005515|GO:0016787|GO:0009653|GO:0005615|GO:0006807|GO:0009056|GO:0048646|GO:0031982|GO:0001568|GO:0050839|GO:0048514|GO:0031226|GO:0044281|GO:1901135|GO:0016021|GO:0006082|GO:0001525|GO:0016798|GO:0048731|GO:0007275|GO:…	extracellular region|metabolic process|cell|membrane|developmental process|catalytic activity|cellular process|organic substance metabolic process|cellular metabolic process|membrane-bounded organelle|ion binding|anatomical structure development|cell periphery|regulation of developmental process|intrinsic component of membrane|plasma membrane|protein binding|hydrolase activity|anatomical structur…	-	-	-	-	9:71683366-71816690	DOWN
ENSG00000116016	EPAS1	endothelial PAS domain protein 1 [Source:HGNC Symbol;Acc:HGNC:3374]	protein_coding	GO:0023052|GO:0008152|GO:0000003|GO:0005623|GO:0022414|GO:0032991|GO:0002376|GO:0032502|GO:0009987|GO:0050896|GO:0071704|GO:0044237|GO:0007165|GO:0043227|GO:0003006|GO:0048856|GO:0043234|GO:0097159|GO:0009628|GO:0002520|GO:0016043|GO:0002262|GO:0019222|GO:0005515|GO:0007154|GO:0009893|GO:0006950|GO:0005622|GO:0009653|GO:0009058|GO:0043229|GO:0006807|GO:0048646|GO:0051716|GO:0003700|GO:0050794|GO:…	signaling|metabolic process|reproduction|cell|reproductive process|macromolecular complex|immune system process|developmental process|cellular process|response to stimulus|organic substance metabolic process|cellular metabolic process|signal transduction|membrane-bounded organelle|developmental process involved in reproduction|anatomical structure development|protein complex|organic cyclic compou…	K09095	hypoxia-inducible factor 2 alpha[-]	hsa05200|hsa05211	Pathways in cancer - Homo sapiens (human)|Renal cell carcinoma - Homo sapiens (human)	2:46293667-46386703	DOWN
ENSG00000179776	CDH5	cadherin 5 [Source:HGNC Symbol;Acc:HGNC:1764]	protein_coding	GO:0023052|GO:0005623|GO:0016020|GO:0032502|GO:0009987|GO:0030054|GO:0050896|GO:0007165|GO:0043167|GO:0048856|GO:0071944|GO:0050793|GO:0008283|GO:0016043|GO:0031224|GO:0007155|GO:0009986|GO:0005886|GO:0005515|GO:0007154|GO:0005911|GO:0051716|GO:0048523|GO:0050794|GO:0009888|GO:0045597|GO:0032878|GO:0001568|GO:0009897|GO:0005102|GO:0070160|GO:0044325|GO:0022607|GO:0071559|GO:0016021|GO:0008285|GO:…	signaling|cell|membrane|developmental process|cellular process|cell junction|response to stimulus|signal transduction|ion binding|anatomical structure development|cell periphery|regulation of developmental process|cell proliferation|cellular component organization|intrinsic component of membrane|cell adhesion|cell surface|plasma membrane|protein binding|cell communication|cell-cell junction|cellu…	K06533	cadherin 5, type 2, VE-cadherin[-]	hsa04514|hsa05418|hsa04670	Cell adhesion molecules (CAMs) - Homo sapiens (human)|Fluid shear stress and atherosclerosis - Homo sapiens (human)|Leukocyte transendothelial migration - Homo sapiens (human)	16:66366622-66404786	DOWN
ENSG00000078098	FAP	fibroblast activation protein alpha [Source:HGNC Symbol;Acc:HGNC:3590]	protein_coding	GO:0040011|GO:0005576|GO:0008152|GO:0005623|GO:0016020|GO:0032502|GO:0003824|GO:0009987|GO:0030054|GO:0051179|GO:0050896|GO:0071704|GO:0044237|GO:0030055|GO:0048870|GO:0048856|GO:0071944|GO:0008283|GO:0016043|GO:0031224|GO:0007155|GO:0009986|GO:0019222|GO:0005886|GO:0044877|GO:0042995|GO:0005515|GO:0045178|GO:0006950|GO:0005622|GO:0016787|GO:0009653|GO:0009605|GO:0005615|GO:0006807|GO:0009056|GO:…	locomotion|extracellular region|metabolic process|cell|membrane|developmental process|catalytic activity|cellular process|cell junction|localization|response to stimulus|organic substance metabolic process|cellular metabolic process|cell-substrate junction|cell motility|anatomical structure development|cell periphery|cell proliferation|cellular component organization|intrinsic component of membra…	-	-	-	-	2:162170684-162245151	DOWN
