# Supplementary material for: ANGPTL4-ETV5-CDH5 Signaling Axis: A Novel Pathway Driving Metastasis in Ovarian Cancer
Source: Research Square preprint supplement (doi:10.21203/rs.3.rs-8747059/v1), 2026-02-17
Supplement: Supplementary file 3 [file a719dc03463a2fe1c95adf59.docx]

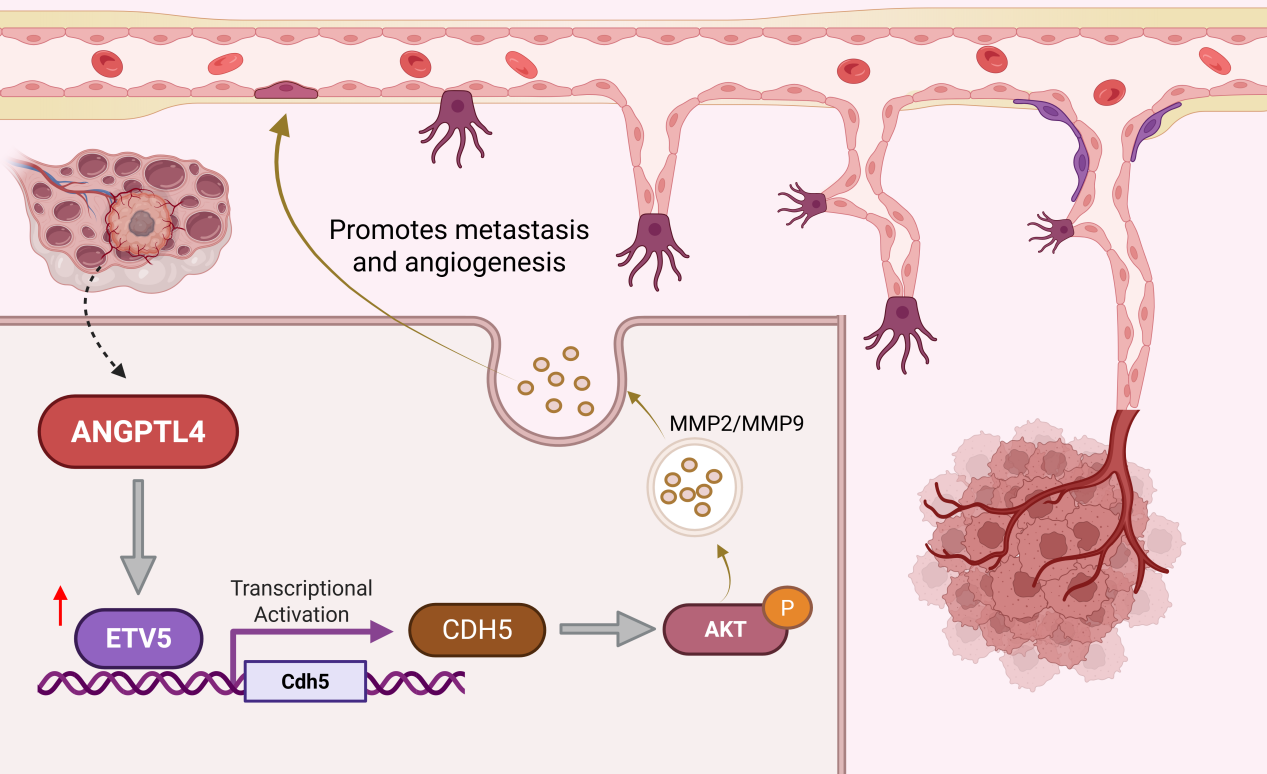


**Supplementary Figure 1.**

An elevated ANGPTL4 in ovarian cancer increases the expression of CDH5 by up-regulating ETV5 which could binding to CDH5 promoter region, would activate AKT followed by induction of MMP9. At the same time, high expression of ANGPTL4 can promote angiogenesis of ovarian cancer.
